# Supplementary material
Source: PubMed Central journal article supplement (PMC2634583)

# xxxxmotif-xxxxx

v1.2 10.05.06

## Supplementary Table 1 Yeast Serine and Threonine Phosphorylation Motifs

### Serine Phosphorylation Motifs

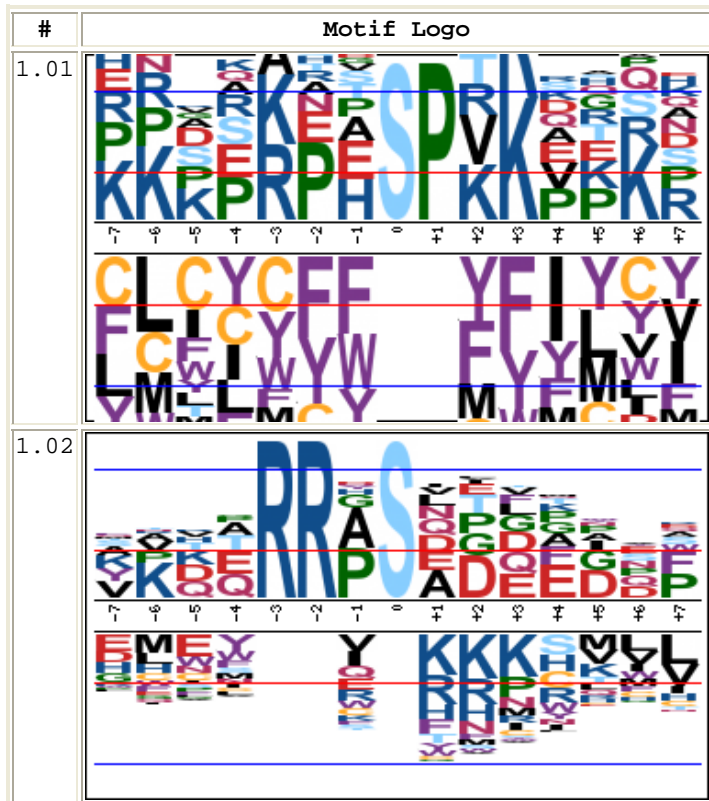

| #    | Motif                | Motif Score | Foreground Matches | Foreground Size | Background Matches | Background Size | Fold Increase | -Log(P) Value |
|------|----------------------|-------------|--------------------|-----------------|--------------------|-----------------|---------------|---------------|
| 1.01 | <u>.....SP.....</u>  | 324.00      | 849                | 3882            | 9581               | 234335          | 5.35          | 324.0000      |
| 1.02 | <u>....RR.S.....</u> | 297.71      | 154                | 3033            | 661                | 224754          | 17.26         | 130.5078      |
| 1.03 | <u>....RS.S.....</u> | 179.98      | 119                | 2879            | 1093               | 224093          | 8.47          | 67.0843       |
| 1.04 | <u>....RK.S.....</u> | 123.46      | 79                 | 2760            | 761                | 223000          | 8.39          | 44.4233       |
| 1.05 | <u>....R..S.....</u> | 79.18       | 316                | 2681            | 7529               | 222239          | 3.48          | 79.1839       |
| 1.06 | <u>.....SD.E....</u> | 114.46      | 132                | 2365            | 1034               | 214710          | 11.59         | 90.8534       |
| 1.07 | <u>.....SD.D....</u> | 86.91       | 101                | 2233            | 887                | 213676          | 10.90         | 67.1109       |
| 1.08 | <u>.....R.S.....</u> | 31.04       | 210                | 2132            | 8511               | 212789          | 2.46          | 31.0430       |
| 1.09 | <u>.....SE.E....</u> | 51.68       | 75                 | 1922            | 943                | 204278          | 8.45          | 42.5863       |
| 1.10 | <u>.R..S..S.....</u> | 48.59       | 83                 | 1847            | 1174               | 203335          | 7.78          | 44.4705       |
| 1.11 | <u>.....S..D....</u> | 20.12       | 202                | 1764            | 11438              | 202161          | 2.02          | 20.1196       |
| 1.12 | <u>....K..S.....</u> | 16.35       | 205                | 1562            | 13558              | 190723          | 1.85          | 16.3537       |
| 1.13 | <u>.....S..E....</u> | 10.73       | 145                | 1357            | 10572              | 177165          | 1.79          | 10.7252       |
| 1.14 | <u>...R...S.....</u> | 10.83       | 99                 | 1212            | 6530               | 166593          | 2.08          | 10.8266       |
| 1.15 | <u>.....S.....</u>   | 0.00        | 1113               | 1113            | 160063             | 160063          | 1.00          | 0.0000        |

Motif search time: 28 seconds

1.03

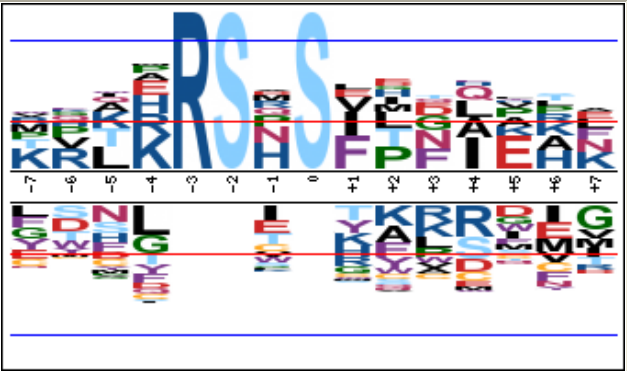

1.04

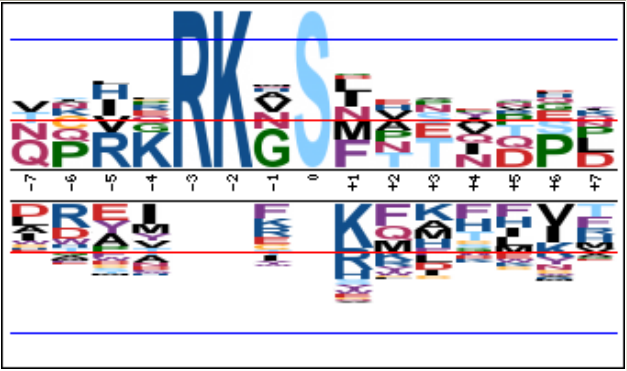

1.05

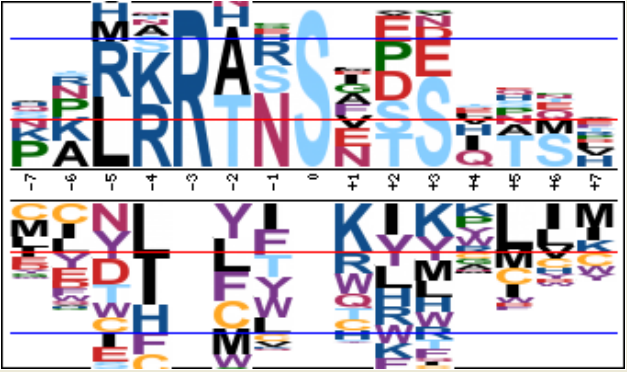

1.06

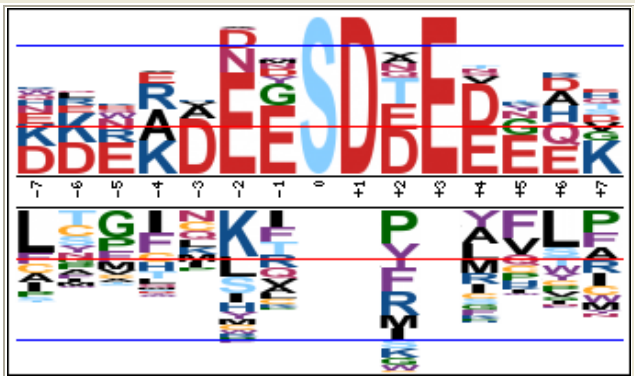

1.07

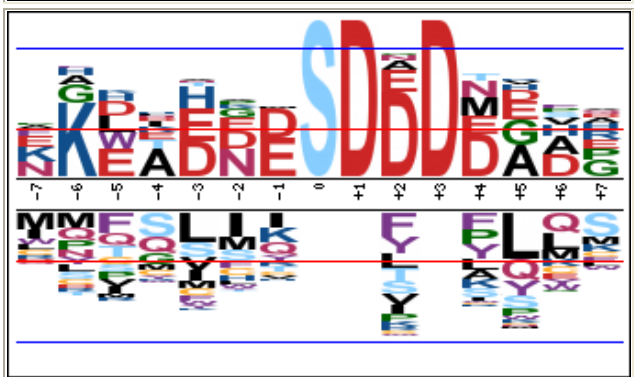

1.08

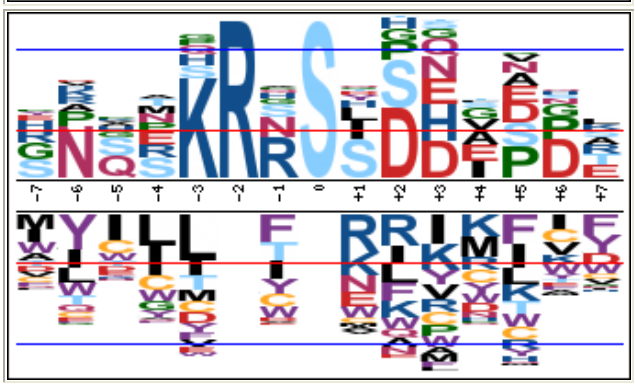

1.09

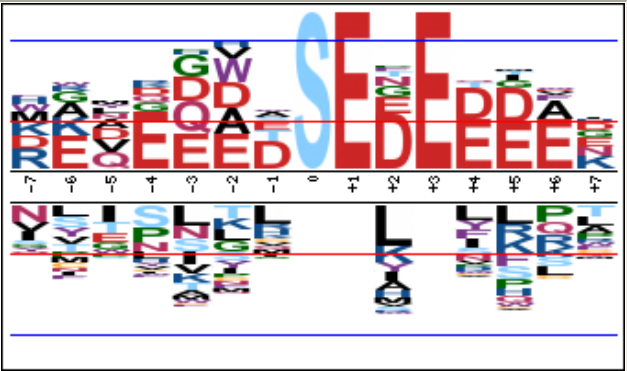

1.10

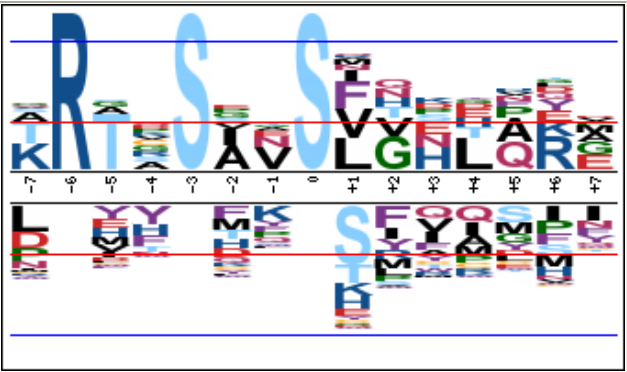

1.11

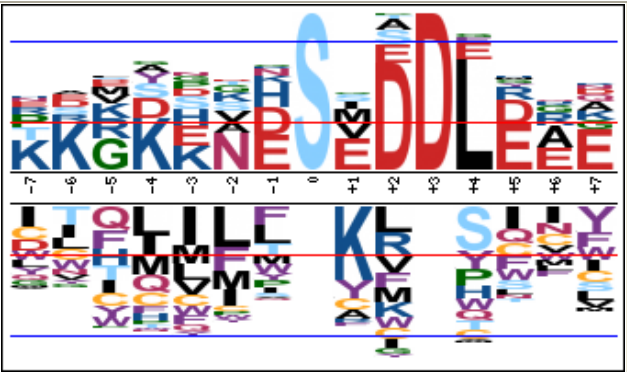

1.12

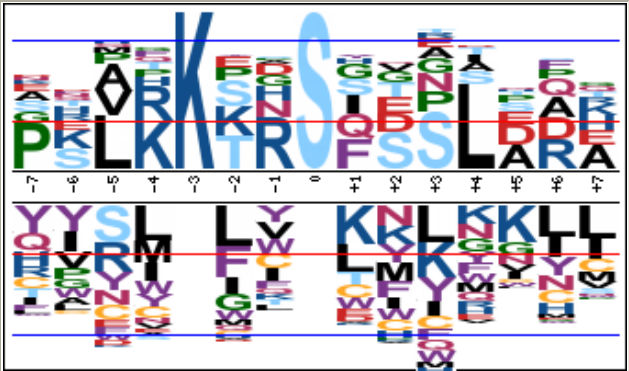

1.13

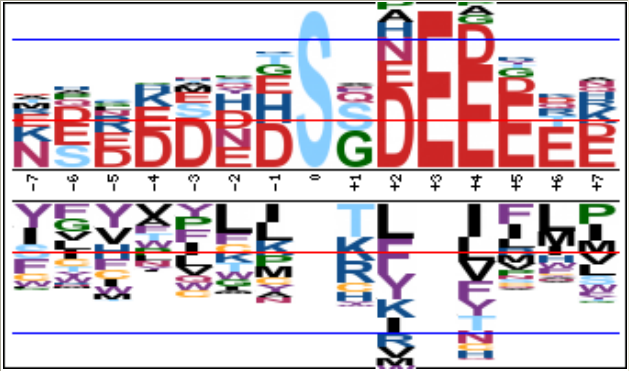

1.14

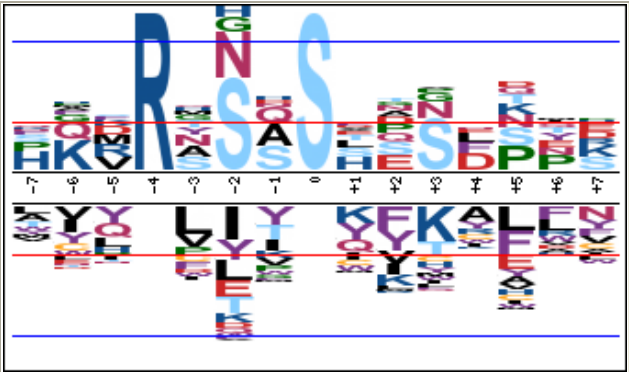

1.15

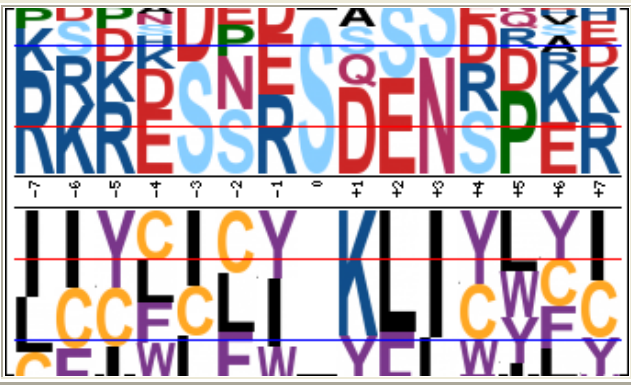

## Threonine Phosphorylation Motifs

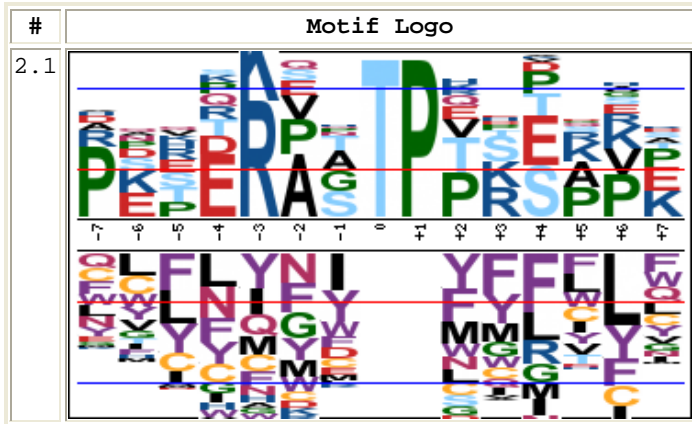

| #   | Motif                | Motif Score | Foreground Matches | Foreground Size | Background Matches | Background Size | Fold Increase | -Log(P) Value |
|-----|----------------------|-------------|--------------------|-----------------|--------------------|-----------------|---------------|---------------|
| 2.1 | <u>.....TP.....</u>  | 155.08      | 287                | 833             | 7630               | 153975          | 6.95          | 155.0784      |
| 2.2 | <u>....RR.T.....</u> | 53.52       | 32                 | 546             | 309                | 146345          | 27.76         | 34.3031       |
| 2.3 | <u>....R..T.....</u> | 19.22       | 71                 | 514             | 5696               | 146036          | 3.54          | 19.2156       |
| 2.4 | <u>....K..T.....</u> | 10.17       | 72                 | 443             | 10013              | 140340          | 2.28          | 10.1693       |
| 2.5 | <u>.....T.....</u>   | 0.00        | 371                | 371             | 130327             | 130327          | 1.00          | 0.0000        |

Motif search time: 11 seconds

2.2

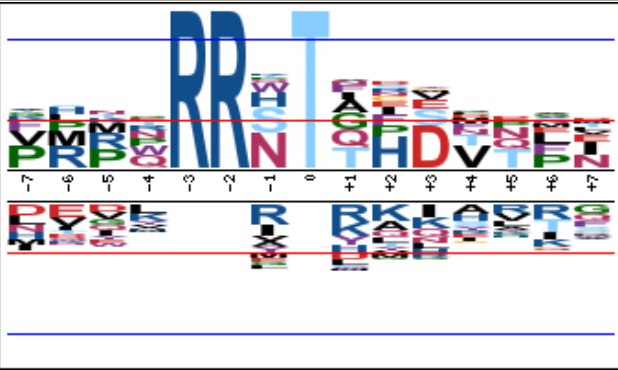

2.3

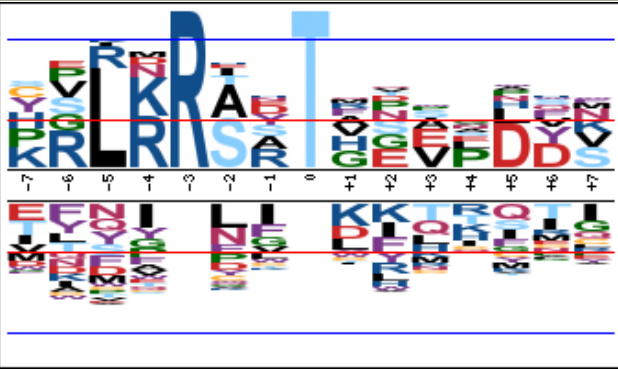

2.4

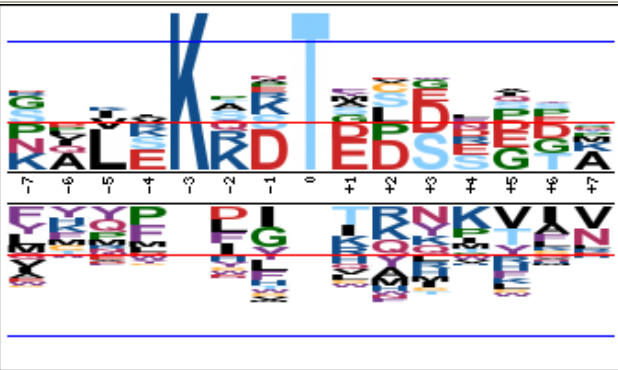

2.5

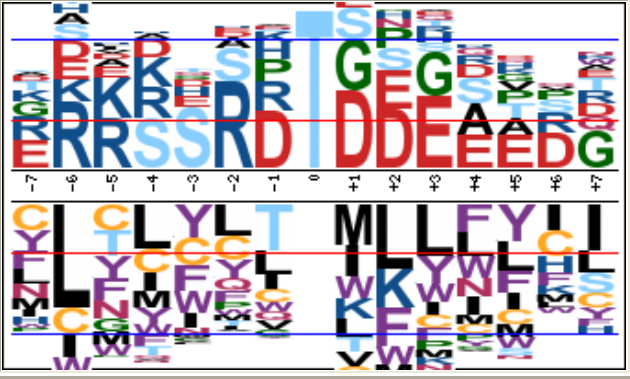

Supplement: M800332-MCP200_1.pdf [file M800332-MCP200_1.pdf]
