# Supplementary material
Source: PubMed Central journal article supplement (PMC2634583)

# xxxxmotif-xxxxx

v1.2 10.05.06

## Supplementary Table 3 Mouse Serine and Threonine Phosphorylation Motifs

### Serine Phosphorylation Motifs

| #    | Motif Logo | #    | Motif                 | Motif Score | Foreground Matches | Foreground Size | Background Matches | Background Size | Fold Increase | -Log(P) Value |
|------|------------|------|-----------------------|-------------|--------------------|-----------------|--------------------|-----------------|---------------|---------------|
| 1.01 |            | 1.01 | <u>....R..SP.....</u> | 346.57      | 253                | 6887            | 4666               | 1078019         | 8.49          | 141.1840      |
|      |            | 1.02 | <u>.....P.SP.....</u> | 346.36      | 347                | 6634            | 7745               | 1073353         | 7.25          | 173.1970      |
|      |            | 1.03 | <u>...SP..SP.....</u> | 348.47      | 89                 | 6287            | 1110               | 1065608         | 13.59         | 66.6235       |
|      |            | 1.04 | <u>.....SP.R....</u>  | 334.20      | 132                | 6198            | 3165               | 1064498         | 7.16          | 65.3963       |
|      |            | 1.05 | <u>.....SP.....</u>   | 324.00      | 1289               | 6066            | 58838              | 1061333         | 3.83          | 324.0000      |
|      |            | 1.06 | <u>...RR.S.....</u>   | 342.36      | 215                | 4777            | 4651               | 1002495         | 9.70          | 131.6500      |
|      |            | 1.07 | <u>...RS.S.....</u>   | 234.82      | 214                | 4562            | 6672               | 997844          | 7.02          | 104.4926      |
|      |            | 1.08 | <u>.....SD.E.E..</u>  | 325.94      | 83                 | 4348            | 518                | 991172          | 36.53         | 96.3077       |
|      |            | 1.09 | <u>.....SD.E....</u>  | 229.74      | 184                | 4265            | 3788               | 990654          | 11.28         | 123.7562      |
| 1.02 |            | 1.10 | <u>...RT.S.....</u>   | 147.85      | 92                 | 4081            | 3271               | 986866          | 6.80          | 44.1591       |
|      |            | 1.11 | <u>.....SEE.E...</u>  | 145.62      | 50                 | 3989            | 682                | 983595          | 18.08         | 43.6881       |
|      |            | 1.12 | <u>...R..S.D.....</u> | 118.50      | 68                 | 3939            | 1917               | 982913          | 8.85          | 39.6652       |
|      |            | 1.13 | <u>.....DSE.E...</u>  | 151.96      | 50                 | 3871            | 501                | 980996          | 25.29         | 50.6522       |
|      |            | 1.14 | <u>.....SDED....</u>  | 125.54      | 40                 | 3821            | 345                | 980495          | 29.75         | 43.4221       |
|      |            | 1.15 | <u>...R..S.....</u>   | 80.12       | 443                | 3781            | 41272              | 980150          | 2.78          | 80.1171       |
|      |            | 1.16 | <u>.....S.DE....</u>  | 100.29      | 93                 | 3338            | 2742               | 938878          | 9.54          | 56.7288       |
|      |            | 1.17 | <u>.....S.E..E..</u>  | 87.08       | 91                 | 3245            | 4610               | 936136          | 5.69          | 37.8402       |
|      |            | 1.18 | <u>.....SD.D....</u>  | 79.32       | 87                 | 3154            | 2827               | 931526          | 9.09          | 51.4972       |
|      |            | 1.19 | <u>.....S.E.....</u>  | 52.01       | 397                | 3067            | 51998              | 928699          | 2.31          | 52.0148       |
|      |            | 1.20 | <u>.R..S..S.....</u>  | 58.26       | 85                 | 2670            | 6061               | 876701          | 4.60          | 29.0961       |
|      |            | 1.21 | <u>.....S.DD....</u>  | 49.27       | 48                 | 2585            | 2193               | 870640          | 7.37          | 24.9470       |
|      |            | 1.22 | <u>.....S.DS....</u>  | 42.94       | 65                 | 2537            | 5010               | 868447          | 4.44          | 21.6289       |

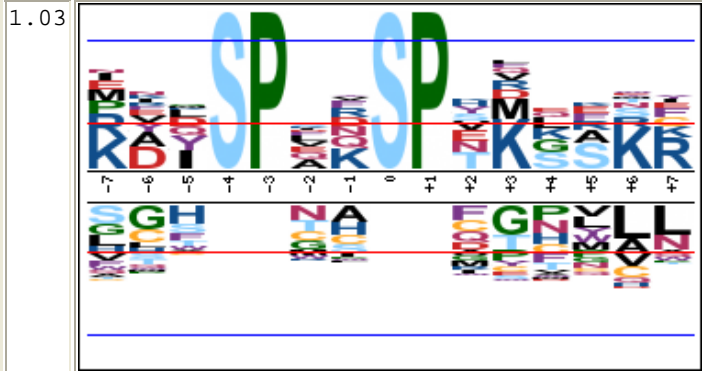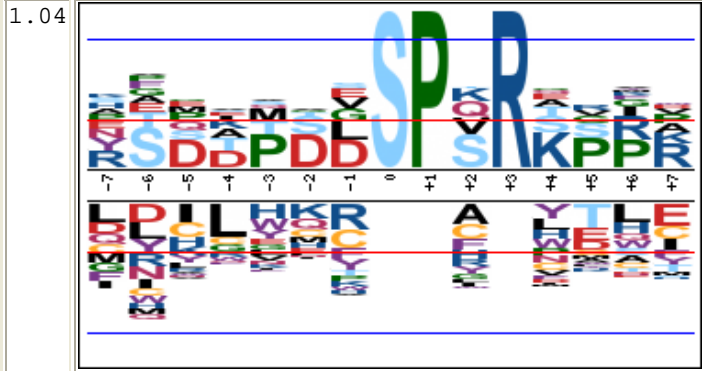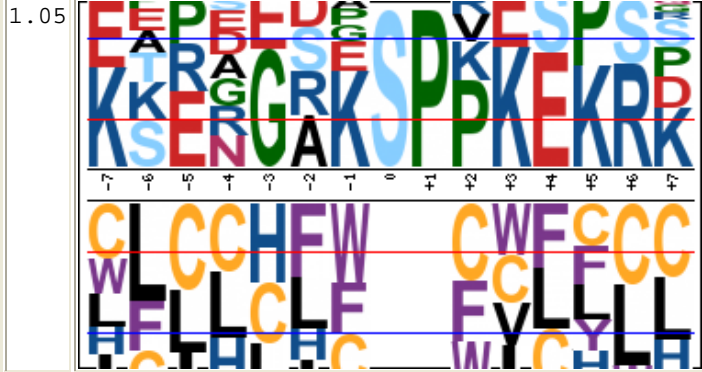

|      |                      |       |     |      |        |        |      |         |
|------|----------------------|-------|-----|------|--------|--------|------|---------|
| 1.23 | <u>.....SE.E....</u> | 42.96 | 63  | 2472 | 3896   | 863437 | 5.65 | 26.3052 |
| 1.24 | <u>....S..S.....</u> | 29.48 | 447 | 2409 | 92260  | 859541 | 1.73 | 29.4811 |
| 1.25 | <u>.....R.S.....</u> | 22.37 | 211 | 1962 | 39567  | 767281 | 2.09 | 22.3716 |
| 1.26 | <u>....S.S.....</u>  | 26.03 | 337 | 1751 | 77263  | 727714 | 1.81 | 26.0338 |
| 1.27 | <u>.....S.S..E..</u> | 29.72 | 49  | 1414 | 4476   | 650451 | 5.04 | 18.7343 |
| 1.28 | <u>.....DS.....</u>  | 14.57 | 135 | 1365 | 30661  | 645975 | 2.08 | 14.5725 |
| 1.29 | <u>.....GS.....</u>  | 11.51 | 159 | 1230 | 44875  | 615314 | 1.77 | 11.5125 |
| 1.30 | <u>.....RS.....</u>  | 11.14 | 115 | 1071 | 31043  | 570439 | 1.97 | 11.1430 |
| 1.31 | <u>.....S..E....</u> | 10.24 | 112 | 956  | 32915  | 539396 | 1.92 | 10.2441 |
| 1.32 | <u>.....S.....</u>   | 0.00  | 844 | 844  | 506481 | 506481 | 1.00 | 0.0000  |

Motif search time: 3 minutes, 40 seconds

1.06

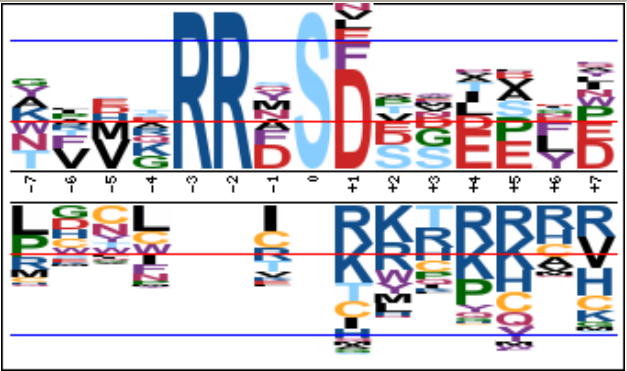

1.07

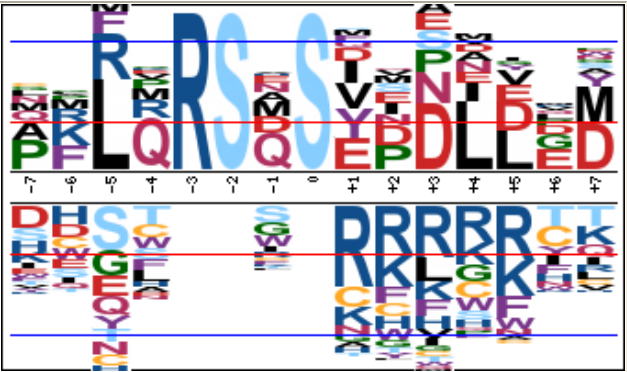

1.08

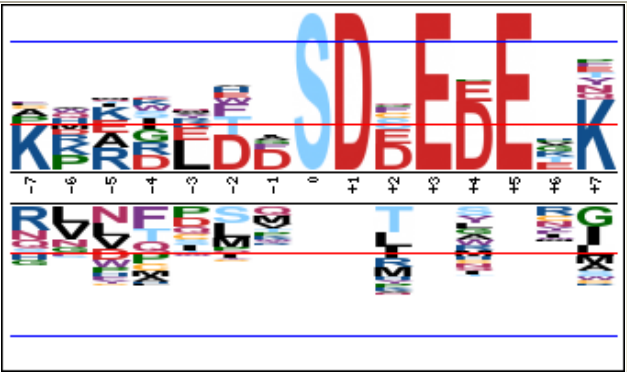

1.09

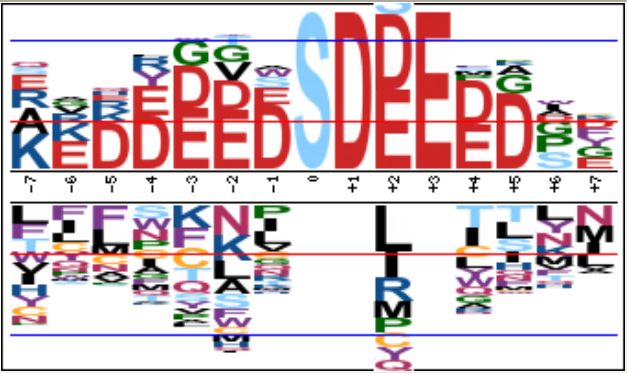

1.10

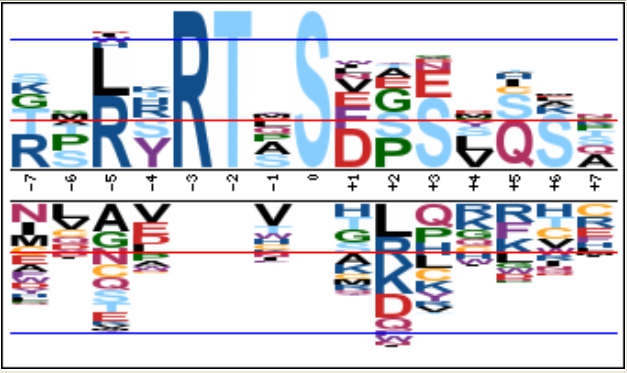

1.11

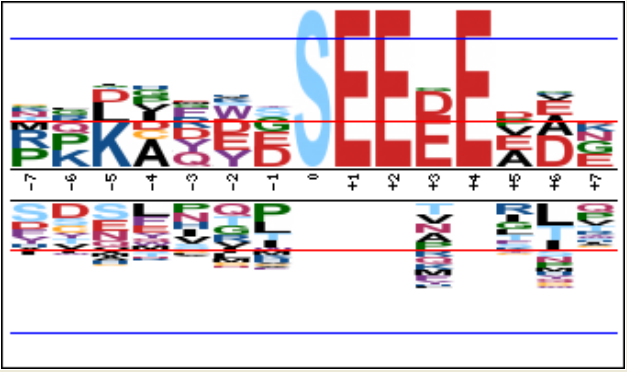





1.18

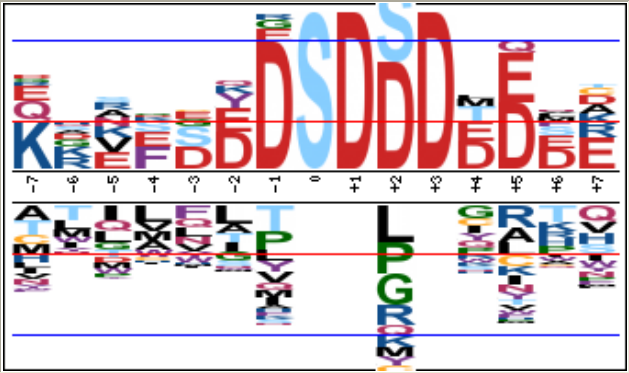

1.19

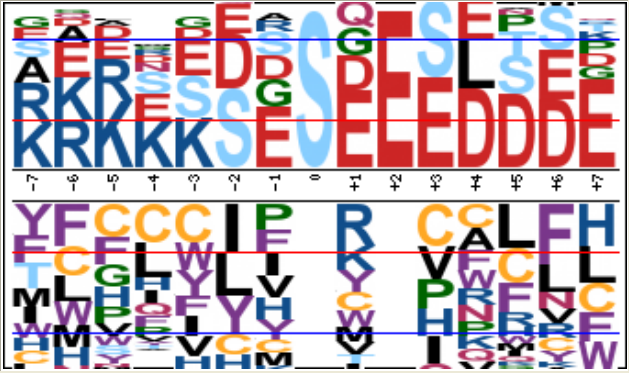

1.20

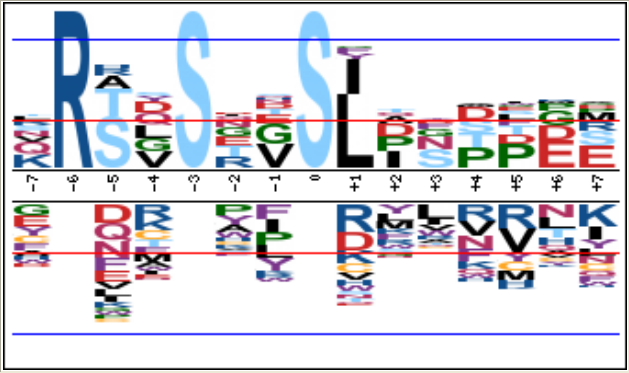

1.21

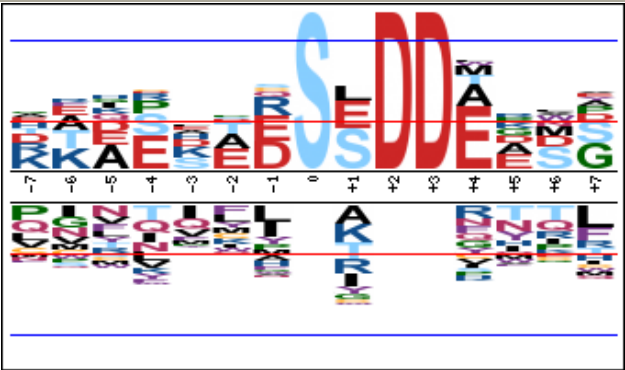

1.22

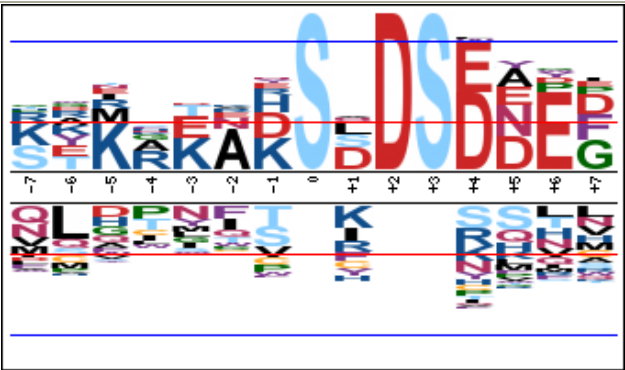

1.23

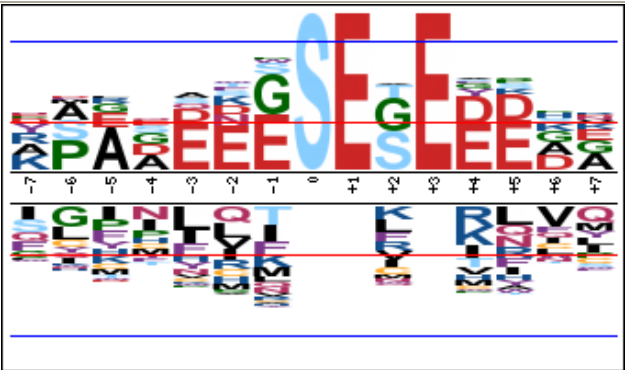



1.24

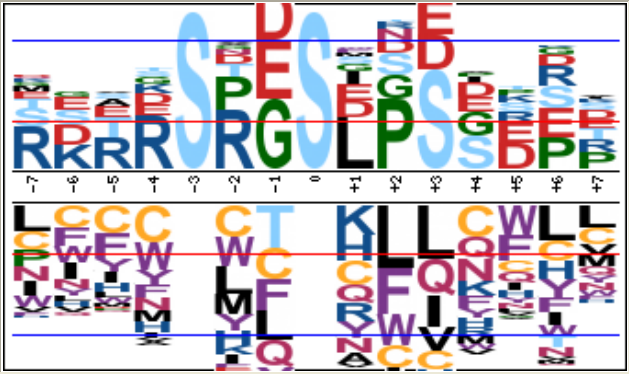

1.25

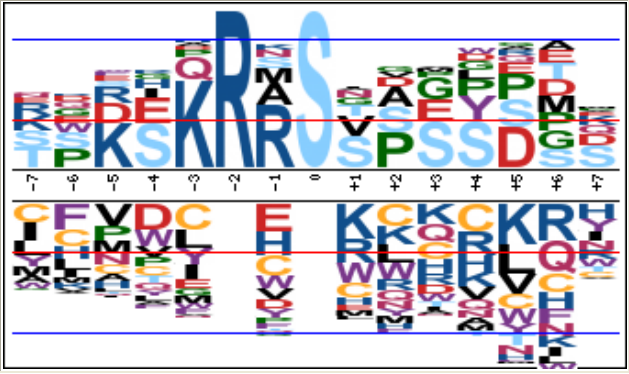

1.26

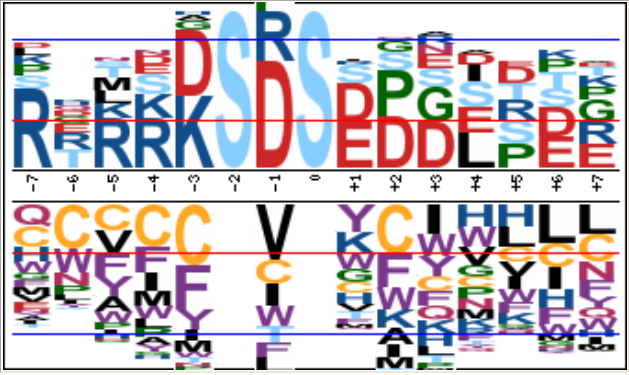

1.27

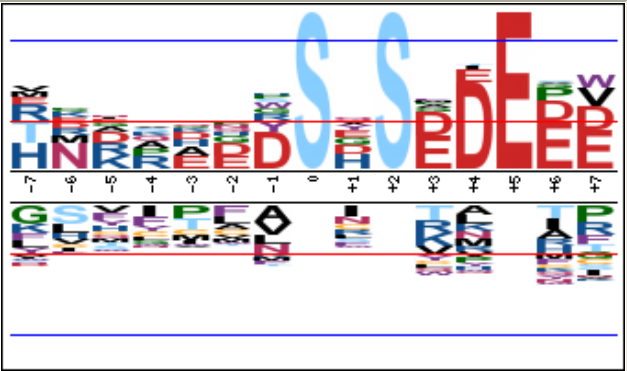

1.28

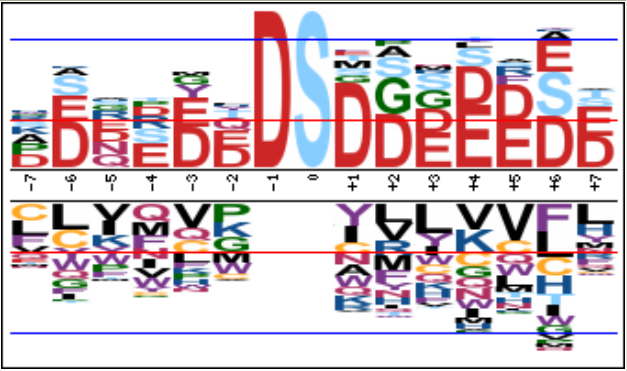

1.29

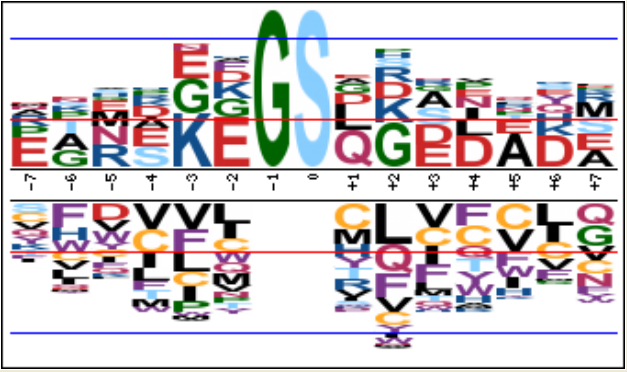



# Threonine Phosphorylation Motifs

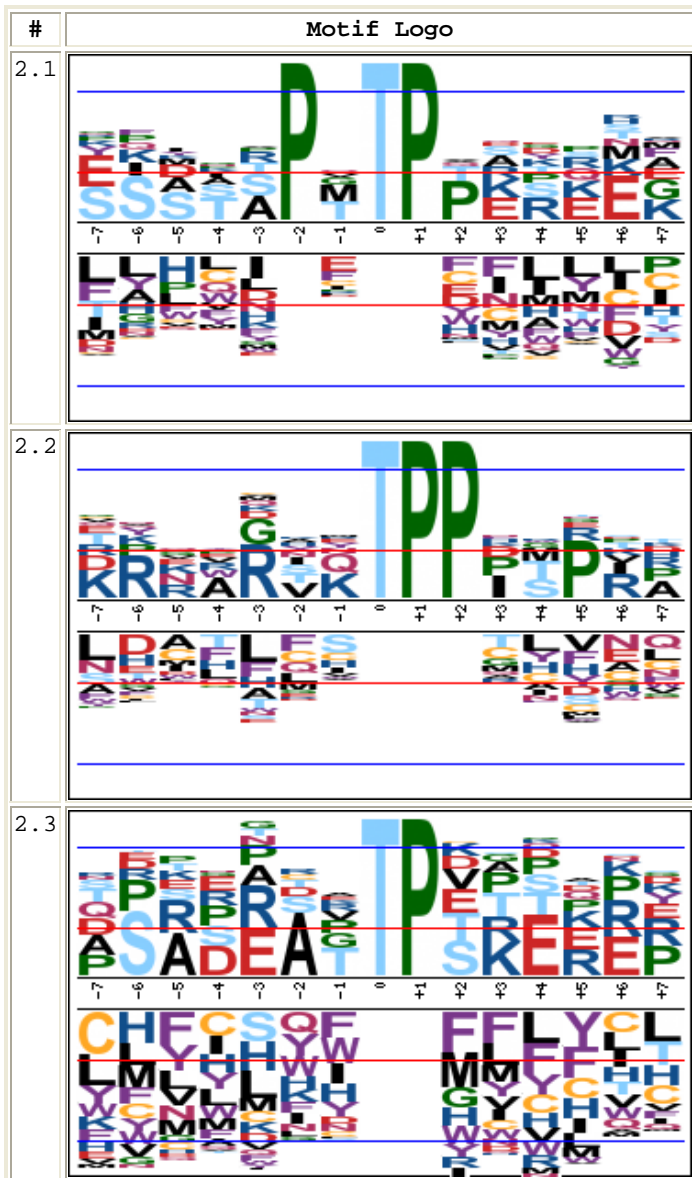

| #   | Motif          | Motif Score | Foreground Matches | Foreground Size | Background Matches | Background Size | Fold Increase | -Log(P) Value |
|-----|----------------|-------------|--------------------|-----------------|--------------------|-----------------|---------------|---------------|
| 2.1 | .....P.TP..... | 257.41      | 146                | 1617            | 4670               | 686955          | 13.28         | 109.3289      |
| 2.2 | .....TPP.....  | 166.05      | 87                 | 1471            | 3099               | 682285          | 13.02         | 64.3911       |
| 2.3 | .....TP.....   | 101.77      | 313                | 1384            | 37009              | 679186          | 4.15          | 101.7679      |
| 2.4 | ....R..T.....  | 22.93       | 146                | 1071            | 35078              | 642177          | 2.50          | 22.9347       |
| 2.5 | .....TSP.....  | 53.85       | 72                 | 925             | 4118               | 607099          | 11.48         | 50.0796       |
| 2.6 | .....TD.E....  | 27.65       | 34                 | 853             | 2217               | 602981          | 10.84         | 23.1527       |
| 2.7 | .....T.S.....  | 12.85       | 141                | 819             | 54345              | 600764          | 1.90          | 12.8487       |
| 2.8 | .....T.....    | 0.00        | 678                | 678             | 546419             | 546419          | 1.00          | 0.0000        |

Motif search time: 1 minute, 3 seconds

2.4

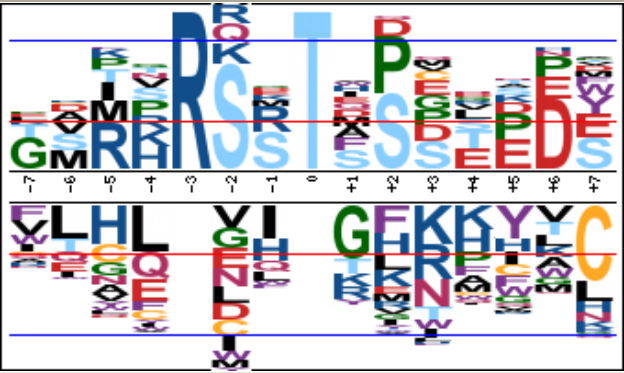

2.5

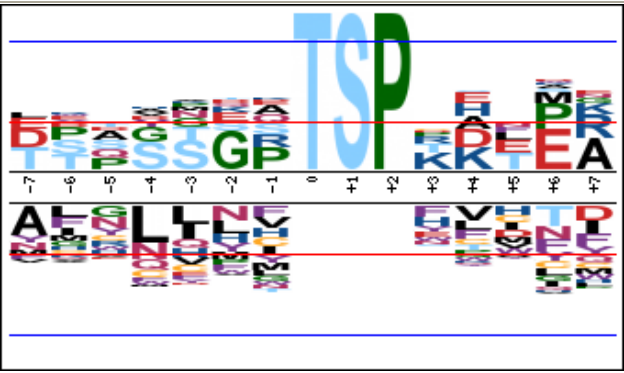

2.6

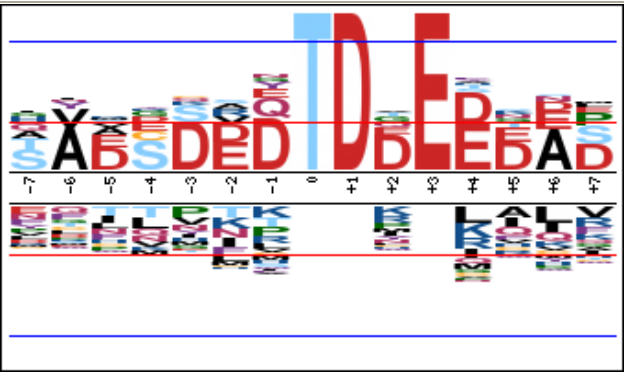

2.7

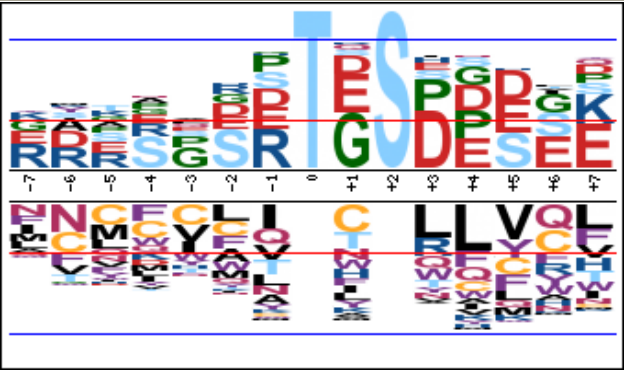

2.8

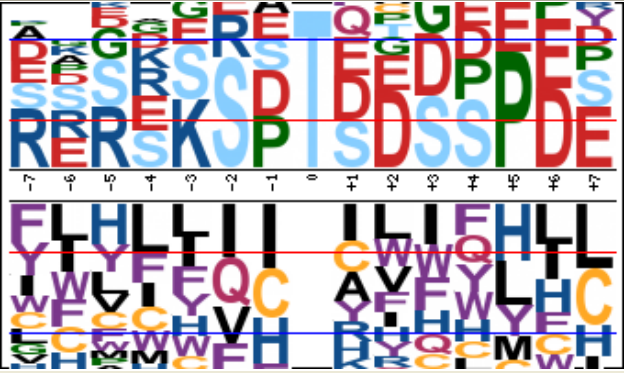

Supplement: M800332-MCP200_3.pdf [file M800332-MCP200_3.pdf]
