# Supplementary material
Source: PubMed Central journal article supplement (PMC2634583)

# xxxxmotif-xxxxx

v1.2 10.05.06

## Supplementary Table 4 Human Serine and Threonine Phosphorylation Motifs

### Serine Phosphorylation Motifs

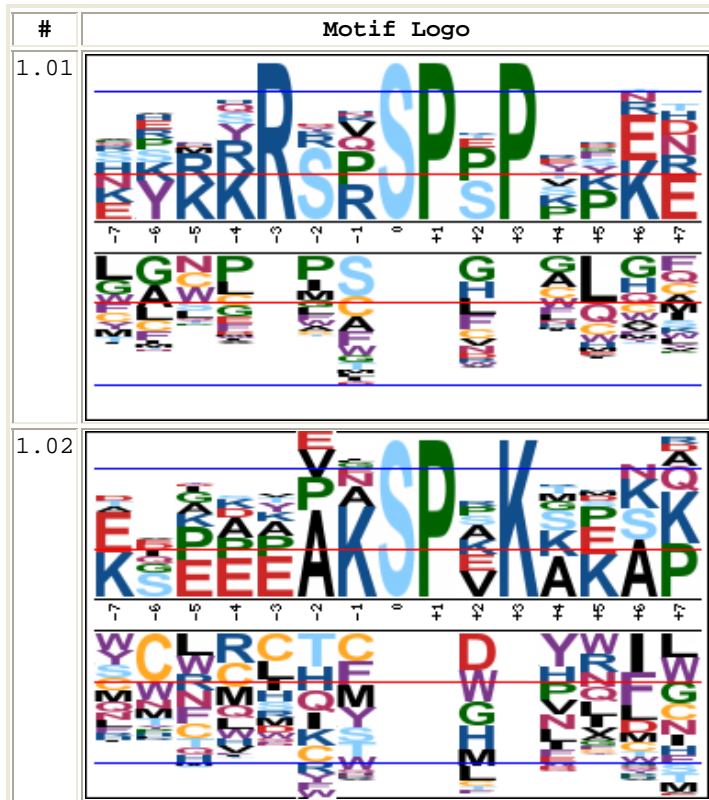

| #    | Motif                           | Motif Score | Foreground Matches | Foreground Size | Background Matches | Background Size | Fold Increase | -Log(P) Value |
|------|---------------------------------|-------------|--------------------|-----------------|--------------------|-----------------|---------------|---------------|
| 1.01 | <a href="#">....R..SP.P....</a> | 386.42      | 117                | 11741           | 626                | 1088700         | 17.33         | 98.6924       |
| 1.02 | <a href="#">.....SP.K....</a>   | 366.86      | 326                | 11624           | 3161               | 1088074         | 9.65          | 197.3139      |
| 1.03 | <a href="#">.....P.SP.....</a>  | 360.67      | 623                | 11298           | 8933               | 1084913         | 6.70          | 291.6096      |
| 1.04 | <a href="#">....R..SP.....</a>  | 358.34      | 304                | 10675           | 3710               | 1075980         | 8.26          | 165.7580      |
| 1.05 | <a href="#">.....SP.R....</a>   | 350.38      | 272                | 10371           | 3808               | 1072270         | 7.39          | 136.7805      |
| 1.06 | <a href="#">.....SP.....K</a>   | 341.06      | 167                | 10099           | 2443               | 1068462         | 7.23          | 82.8922       |
| 1.07 | <a href="#">.....SP....K.</a>   | 337.56      | 148                | 9932            | 2377               | 1066019         | 6.68          | 69.1975       |
| 1.08 | <a href="#">.....SP...RR.</a>   | 347.60      | 50                 | 9784            | 333                | 1063642         | 16.32         | 41.5263       |
| 1.09 | <a href="#">.R.R..S..E....</a>  | 473.12      | 71                 | 9734            | 302                | 1063309         | 25.68         | 71.8597       |
| 1.10 | <a href="#">.....SP.....</a>    | 324.00      | 1657               | 9663            | 55618              | 1063007         | 3.28          | 324.0000      |
| 1.11 | <a href="#">.R.R..S.....</a>    | 433.55      | 438                | 8006            | 4870               | 1007389         | 11.32         | 294.2096      |
| 1.12 | <a href="#">.....SD.E.E..</a>   | 466.07      | 127                | 7568            | 503                | 1002519         | 33.45         | 141.9587      |
| 1.13 | <a href="#">.....SQE.....</a>   | 294.63      | 222                | 7441            | 3782               | 1002016         | 7.90          | 117.7324      |
| 1.14 | <a href="#">.....SD.E.D..</a>   | 337.21      | 64                 | 7219            | 311                | 998234          | 28.46         | 67.6498       |
| 1.15 | <a href="#">...RR.S.....</a>    | 295.05      | 269                | 7155            | 4189               | 997923          | 8.96          | 155.6580      |
| 1.16 | <a href="#">.....DSE.E....</a>  | 326.11      | 94                 | 6886            | 480                | 993734          | 28.26         | 98.6610       |
| 1.17 | <a href="#">.....SQD.....</a>   | 201.18      | 119                | 6792            | 2503               | 993254          | 6.95          | 57.6700       |
| 1.18 | <a href="#">.....SDDE....</a>   | 253.27      | 43                 | 6673            | 225                | 990751          | 28.37         | 45.7157       |
| 1.19 | <a href="#">.....SE.E.E..</a>   | 234.22      | 88                 | 6630            | 687                | 990526          | 19.14         | 78.1595       |
| 1.20 | <a href="#">.....SQG.....</a>   | 162.01      | 131                | 6542            | 3506               | 989839          | 5.65          | 53.4847       |
| 1.21 | <a href="#">....RS.S.....</a>   | 175.73      | 211                | 6411            | 5520               | 986333          | 5.88          | 88.8284       |
| 1.22 | <a href="#">.....SD.E....</a>   | 185.85      | 174                | 6200            | 3161               | 980813          | 8.71          | 98.9593       |

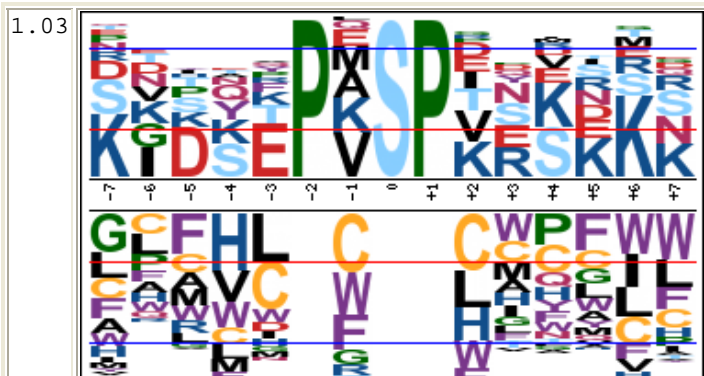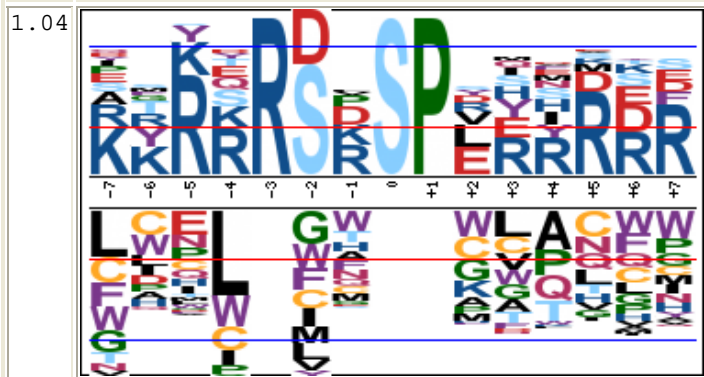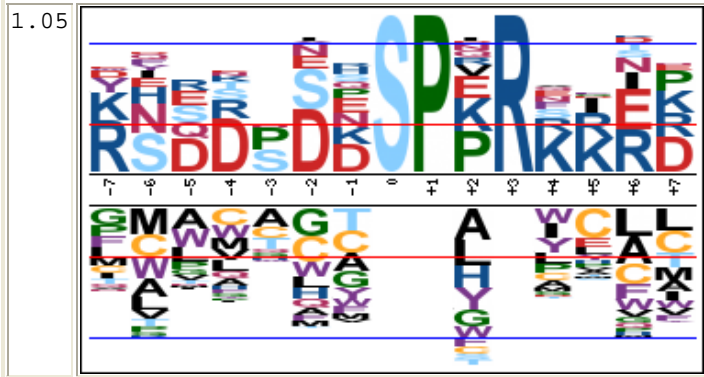

|      |                        |        |      |      |        |        |       |          |
|------|------------------------|--------|------|------|--------|--------|-------|----------|
| 1.23 | <u>.....DSD.D.....</u> | 207.21 | 66   | 6026 | 348    | 977652 | 30.77 | 71.9246  |
| 1.24 | <u>.....SQ.....</u>    | 118.31 | 673  | 5960 | 40155  | 977304 | 2.75  | 118.3113 |
| 1.25 | <u>..K.R.S.....</u>    | 114.08 | 85   | 5287 | 2193   | 937149 | 6.87  | 41.1139  |
| 1.26 | <u>.....SD.D....</u>   | 136.96 | 140  | 5202 | 2583   | 934956 | 9.74  | 85.9347  |
| 1.27 | <u>.....SE.E.D...</u>  | 132.12 | 39   | 5062 | 283    | 932373 | 25.38 | 39.7445  |
| 1.28 | <u>.....S.E.E...</u>   | 101.68 | 135  | 5023 | 4326   | 932090 | 5.79  | 56.3899  |
| 1.29 | <u>...R.S.....</u>     | 76.23  | 516  | 4888 | 39378  | 927764 | 2.49  | 76.2322  |
| 1.30 | <u>.....S.DE....</u>   | 95.52  | 104  | 4372 | 2554   | 888386 | 8.27  | 57.5043  |
| 1.31 | <u>...KR.S.....</u>    | 82.14  | 93   | 4268 | 2845   | 885832 | 6.78  | 44.5307  |
| 1.32 | <u>.....SE.D....</u>   | 75.78  | 105  | 4175 | 2925   | 882987 | 7.59  | 54.6256  |
| 1.33 | <u>.....S..S..E.</u>   | 61.70  | 129  | 4070 | 6100   | 880062 | 4.57  | 43.2858  |
| 1.34 | <u>.....R.S.S....</u>  | 53.99  | 102  | 3941 | 4908   | 873962 | 4.61  | 34.6506  |
| 1.35 | <u>.....S.EE....</u>   | 56.63  | 104  | 3839 | 4900   | 869054 | 4.80  | 36.8202  |
| 1.36 | <u>.....DS.D....</u>   | 47.44  | 61   | 3735 | 2143   | 864154 | 6.59  | 28.8422  |
| 1.37 | <u>.....S...D.D.</u>   | 41.13  | 59   | 3674 | 2216   | 862011 | 6.25  | 26.7769  |
| 1.38 | <u>.R..S..S.....</u>   | 37.86  | 87   | 3615 | 5970   | 859795 | 3.47  | 21.5378  |
| 1.39 | <u>.....S...S...</u>   | 26.13  | 592  | 3528 | 92235  | 853825 | 1.55  | 26.1328  |
| 1.40 | <u>...K..S.....</u>    | 23.75  | 292  | 2936 | 40122  | 761590 | 1.89  | 23.7474  |
| 1.41 | <u>.....R.S.....</u>   | 22.79  | 250  | 2644 | 34623  | 721468 | 1.97  | 22.7874  |
| 1.42 | <u>.....S..EE...</u>   | 32.39  | 62   | 2394 | 3860   | 686845 | 4.61  | 21.4613  |
| 1.43 | <u>.....SD.....</u>    | 17.87  | 190  | 2332 | 27948  | 682985 | 1.99  | 17.8738  |
| 1.44 | <u>...S..S.....</u>    | 14.76  | 358  | 2142 | 72178  | 655037 | 1.52  | 14.7554  |
| 1.45 | <u>.....S.S.....</u>   | 15.99  | 292  | 1784 | 58475  | 582859 | 1.63  | 15.9912  |
| 1.46 | <u>.....S.E.....</u>   | 11.11  | 149  | 1492 | 29093  | 524384 | 1.80  | 11.1053  |
| 1.47 | <u>.....S.D.....</u>   | 11.46  | 125  | 1343 | 23748  | 495291 | 1.94  | 11.4614  |
| 1.48 | <u>.....S..E....</u>   | 10.21  | 128  | 1218 | 27022  | 471543 | 1.83  | 10.2057  |
| 1.49 | <u>.....S.....</u>     | 0.00   | 1090 | 1090 | 444521 | 444521 | 1.00  | 0.0000   |

Motif search time: 5 minutes, 20 seconds

1.06

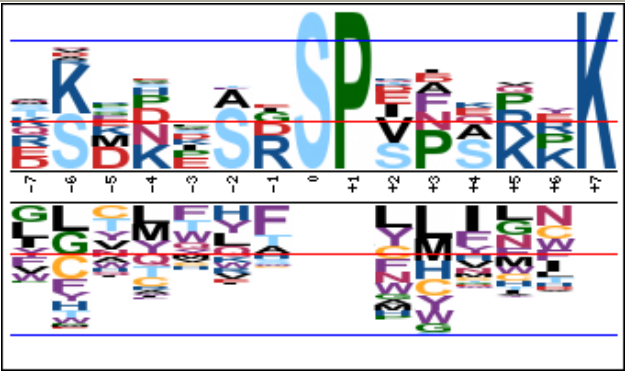

1.07

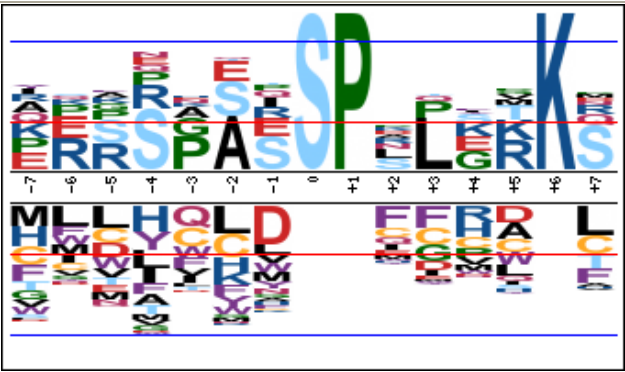

1.08

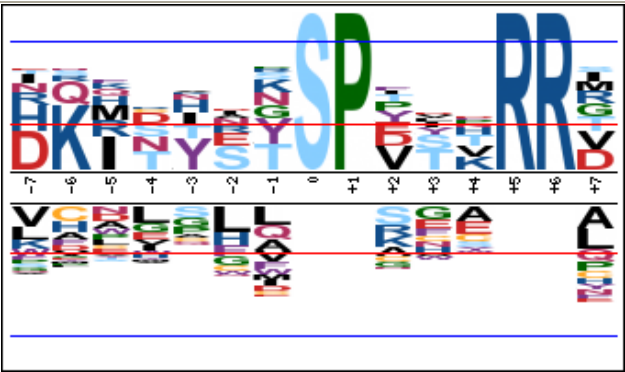

1.09

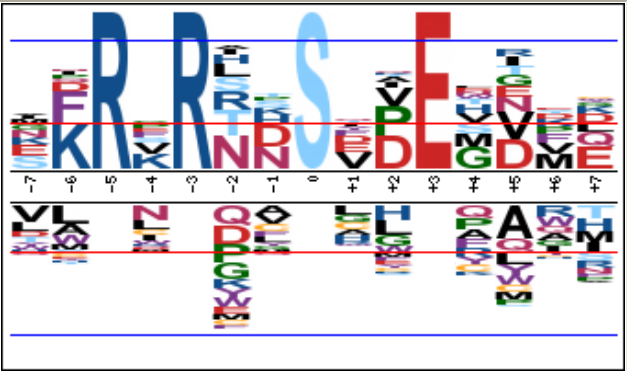

1.10

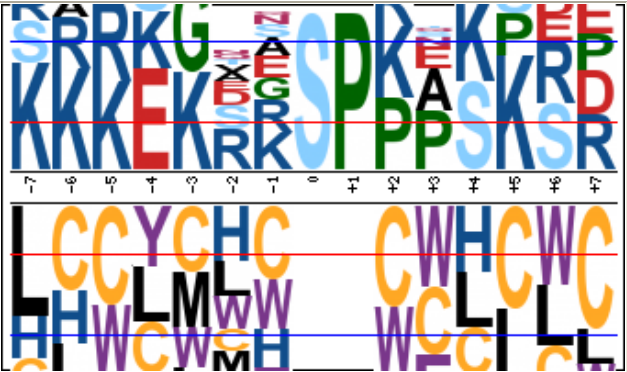

1.11

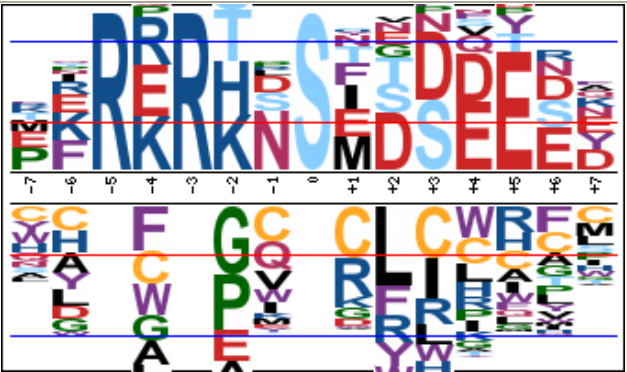

1.12

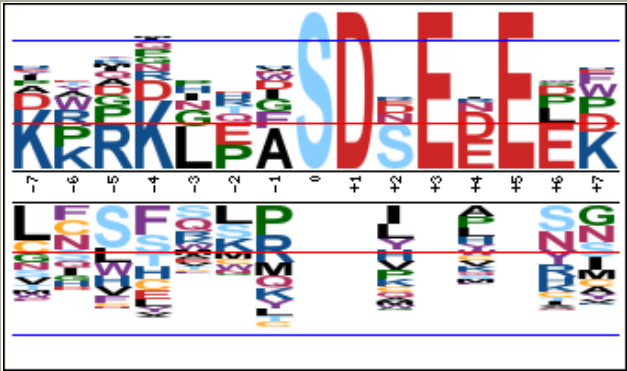

1.13

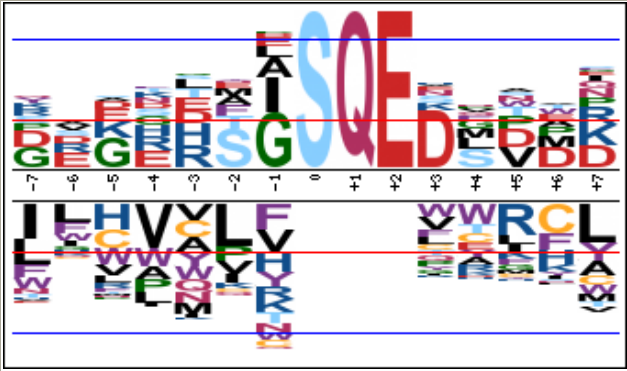

1.14

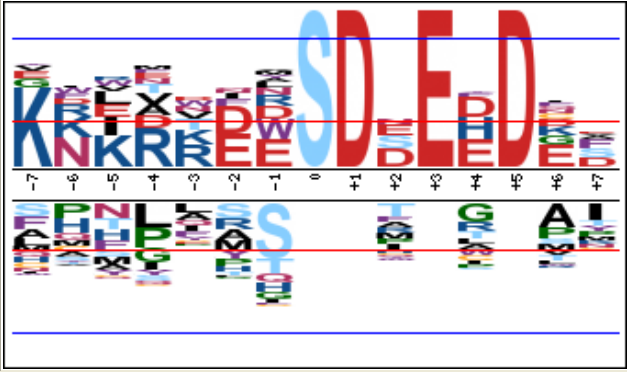

1.15

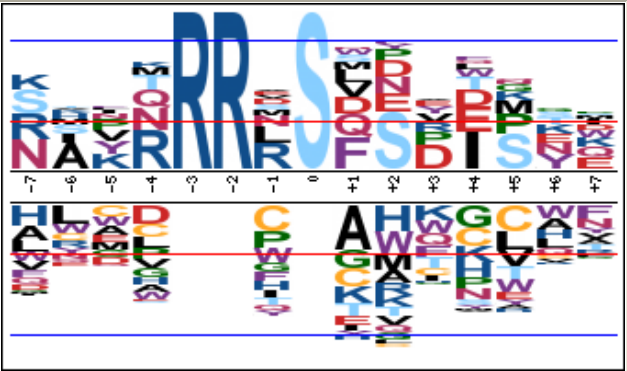

1.16

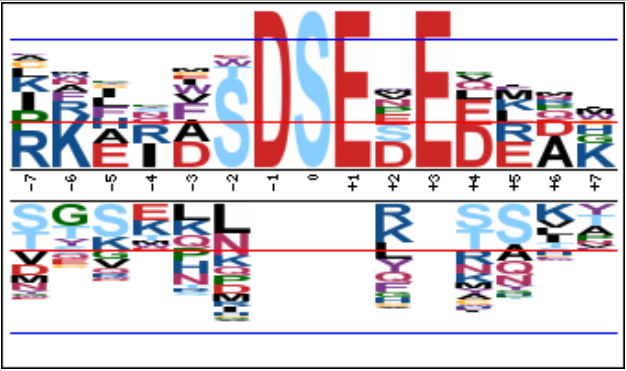

1.17

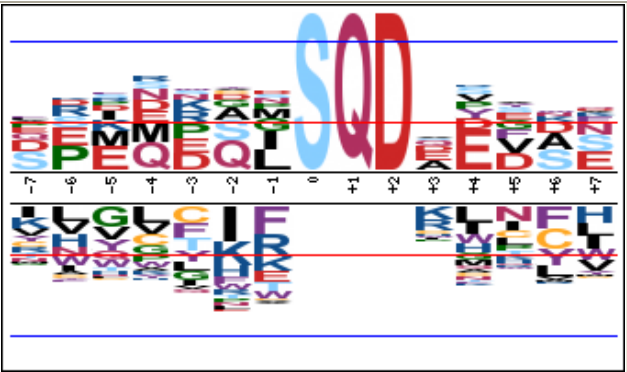



1.21

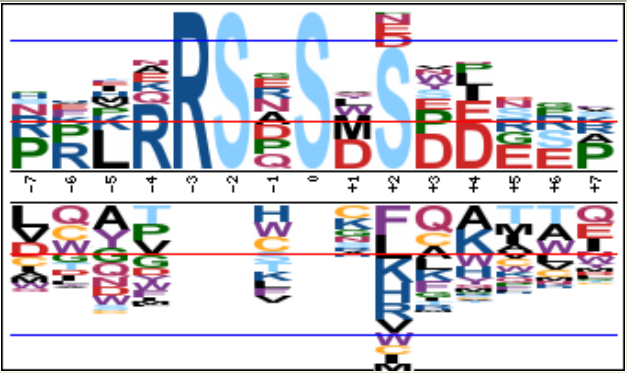

1.22

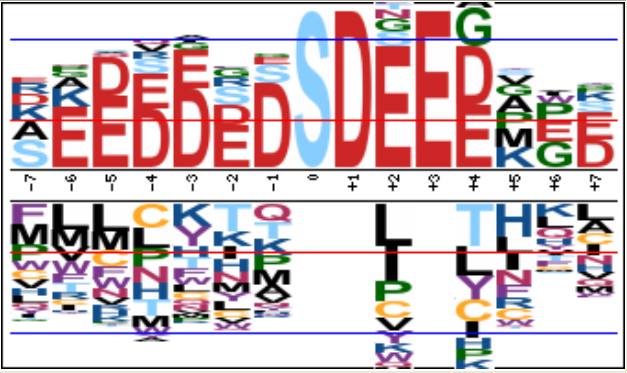

1.23

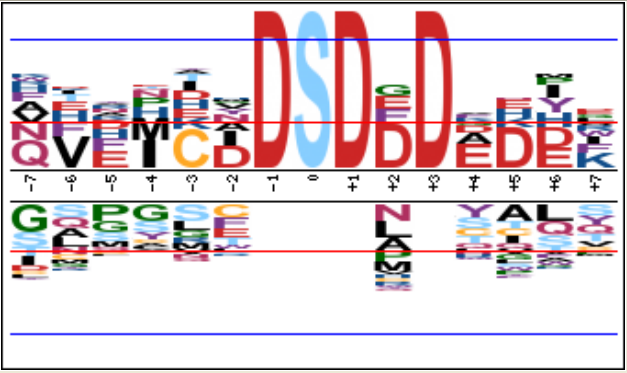



1.24

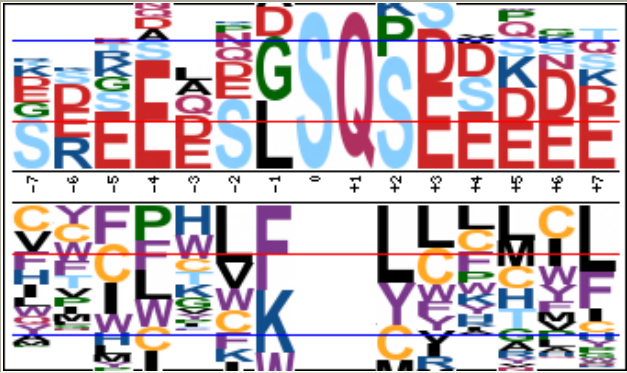

1.25

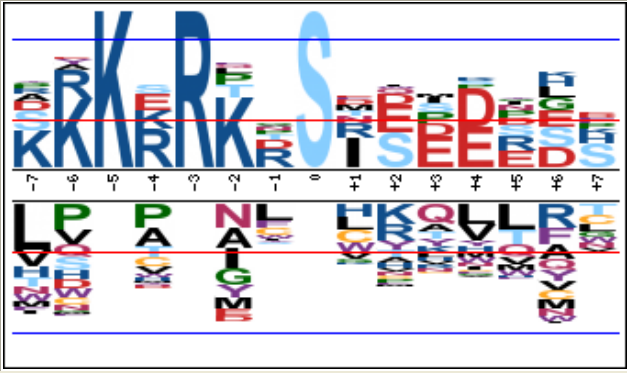

1.26

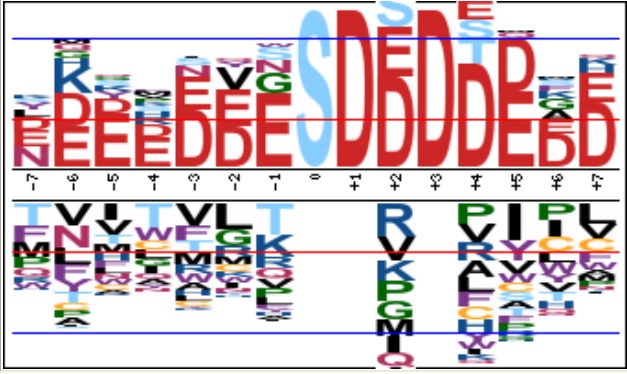



1.30

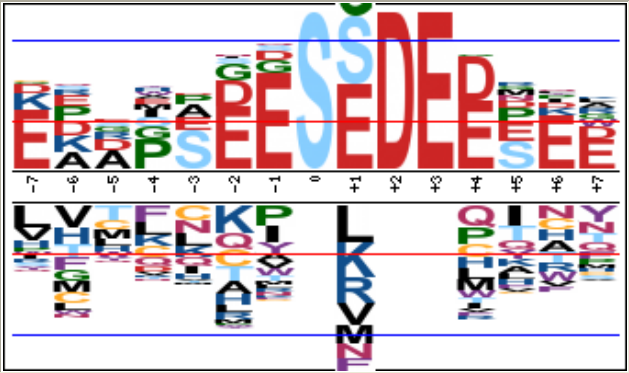

1.31

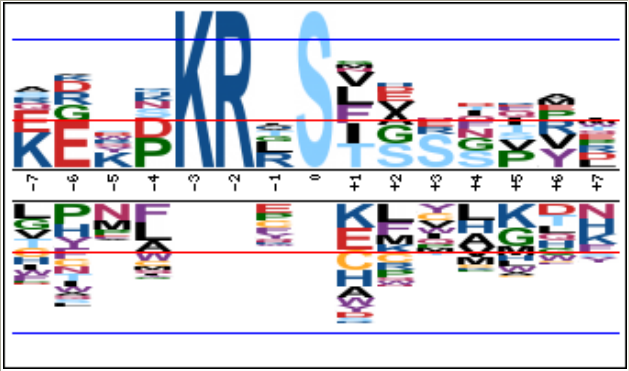

1.32

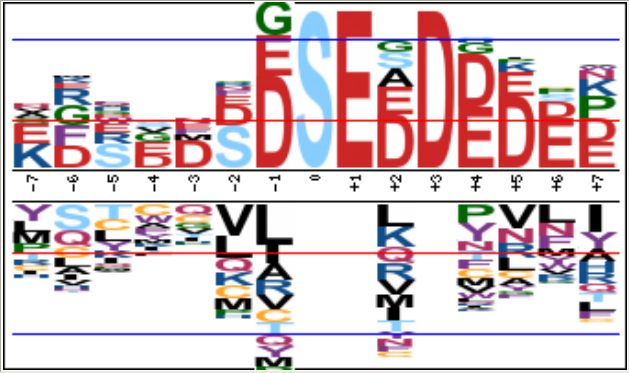

1.33

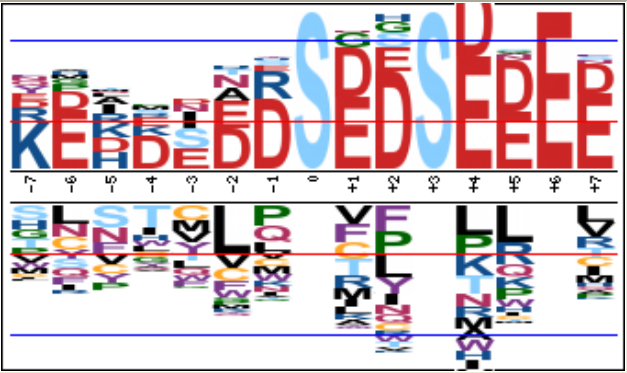

1.34

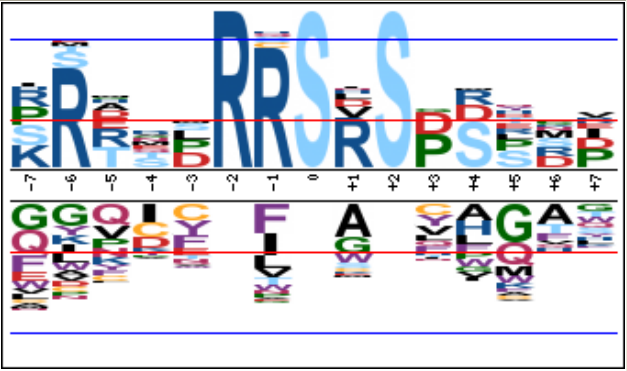

1.35

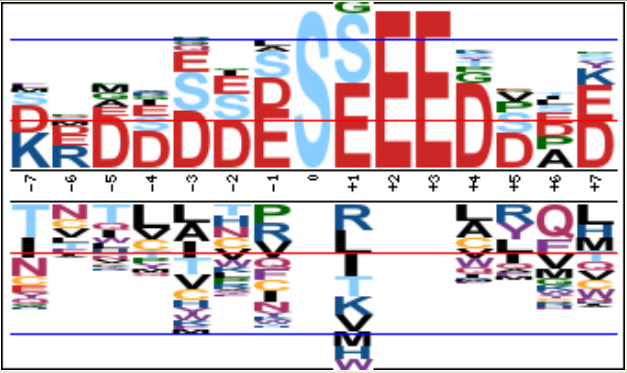

1.36

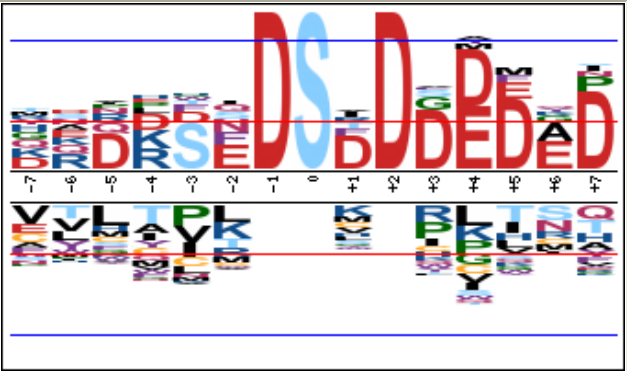

1.37

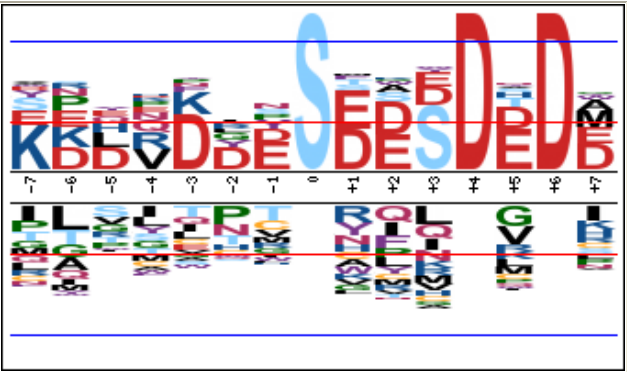

1.38

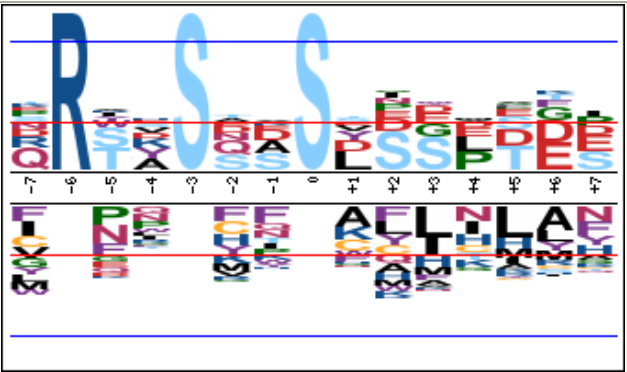



1.42

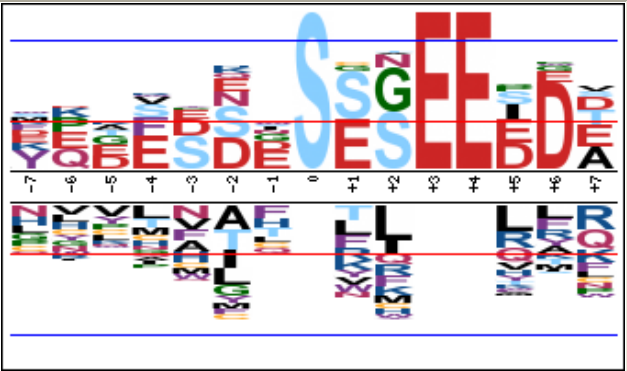

1.43

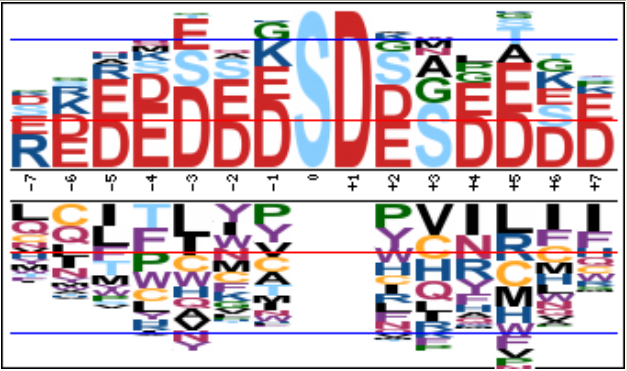

1.44

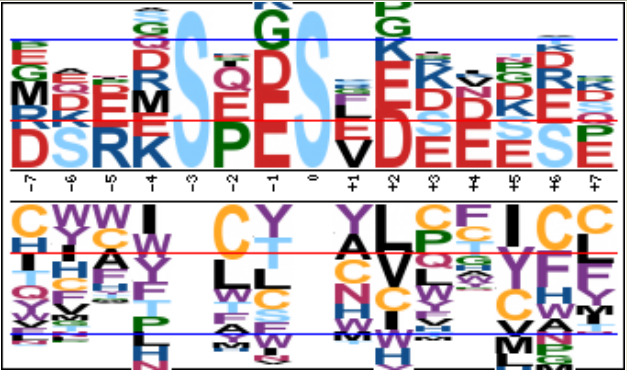

1.45

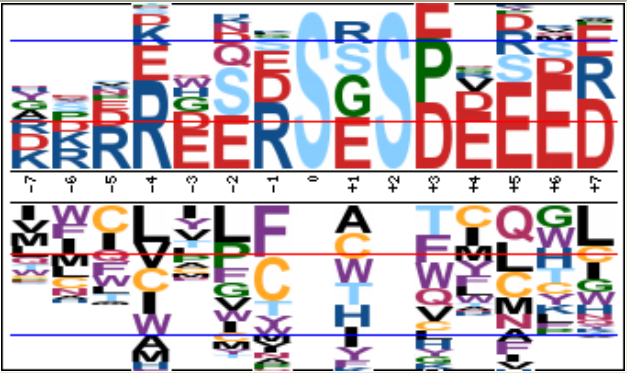

1.46

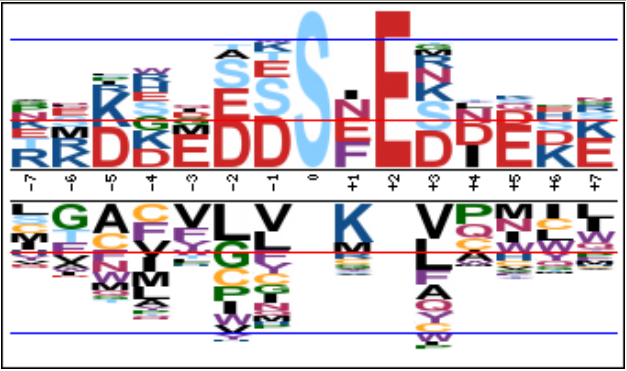

1.47

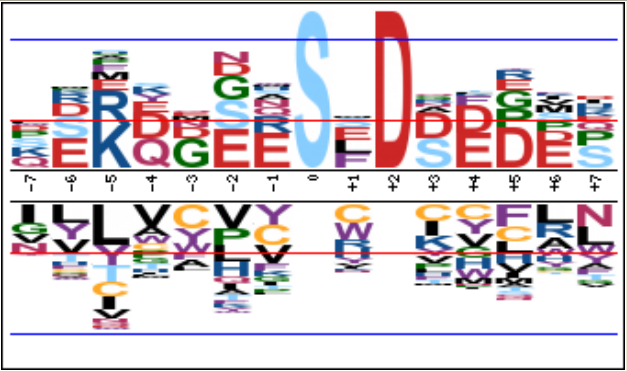





# Threonine Phosphorylation Motifs

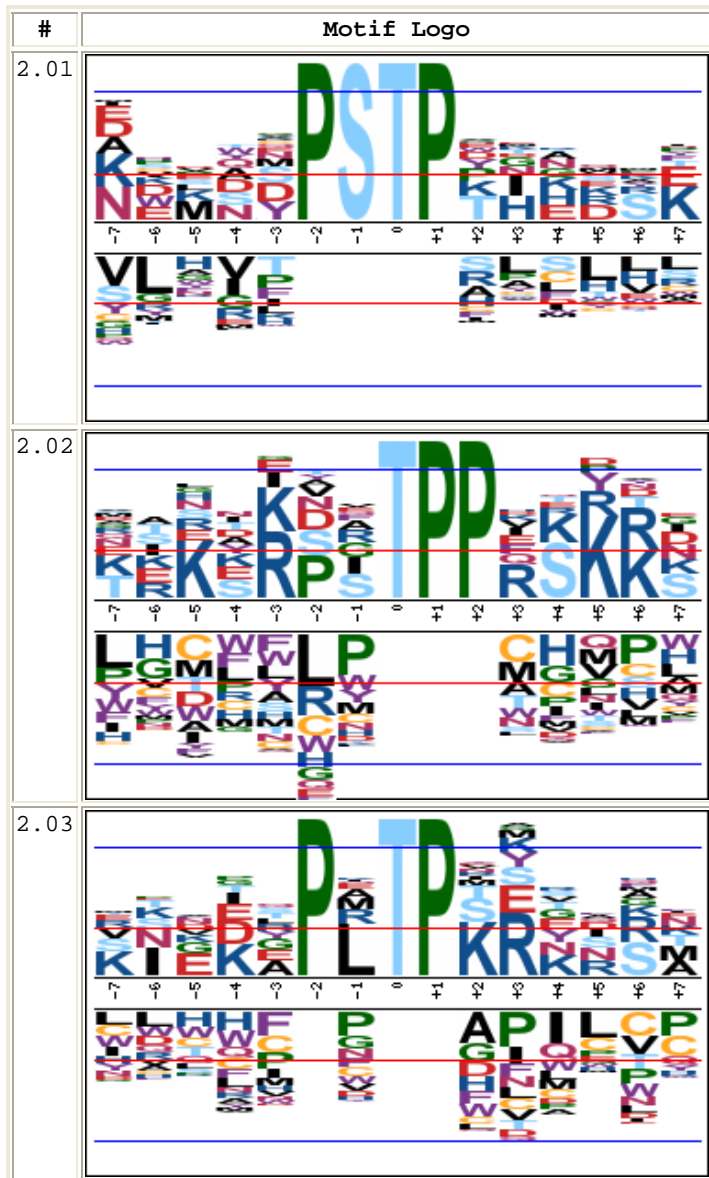

| #    | Motif                 | Motif Score | Foreground Matches | Foreground Size | Background Matches | Background Size | Fold Increase | -Log(P) Value |
|------|-----------------------|-------------|--------------------|-----------------|--------------------|-----------------|---------------|---------------|
| 2.01 | <u>.....PSTP.....</u> | 377.77      | 71                 | 3028            | 516                | 689058          | 31.31         | 77.9933       |
| 2.02 | <u>.....TPP.....</u>  | 354.34      | 229                | 2957            | 3948               | 688542          | 13.51         | 171.7378      |
| 2.03 | <u>.....P.TP.....</u> | 346.60      | 203                | 2728            | 4328               | 684594          | 11.77         | 141.0301      |
| 2.04 | <u>.....STP.....</u>  | 353.51      | 182                | 2525            | 3689               | 680266          | 13.29         | 135.3844      |
| 2.05 | <u>.....TP.K....</u>  | 247.07      | 80                 | 2343            | 1565               | 676577          | 14.76         | 62.9766       |
| 2.06 | <u>.....TP.....</u>   | 184.20      | 515                | 2263            | 33617              | 675012          | 4.57          | 184.2047      |
| 2.07 | <u>..R.R..T.....</u>  | 88.83       | 76                 | 1748            | 2537               | 641395          | 10.99         | 51.0128       |
| 2.08 | <u>.....TQ.....</u>   | 52.88       | 243                | 1672            | 30058              | 638858          | 3.09          | 52.8799       |
| 2.09 | <u>....R..T.....</u>  | 32.73       | 193                | 1429            | 31299              | 608800          | 2.63          | 32.7313       |
| 2.10 | <u>.....TD.E....</u>  | 64.52       | 73                 | 1236            | 2155               | 577501          | 15.83         | 59.9886       |
| 2.11 | <u>.....T..D....</u>  | 12.61       | 114                | 1163            | 26911              | 575346          | 2.10          | 12.6050       |
| 2.12 | <u>.....T.....</u>    | 0.00        | 1049               | 1049            | 548435             | 548435          | 1.00          | 0.0000        |

Motif search time: 1 minute, 14 seconds

2.04

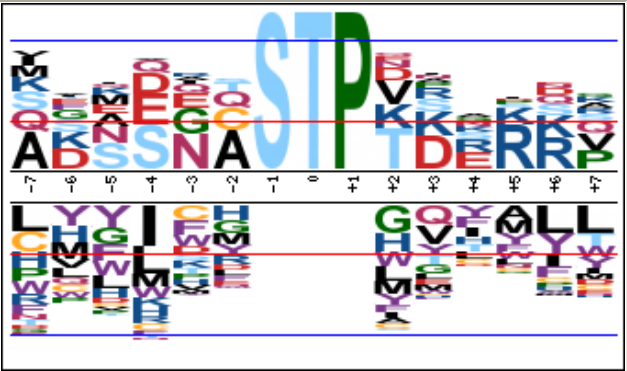

2.05

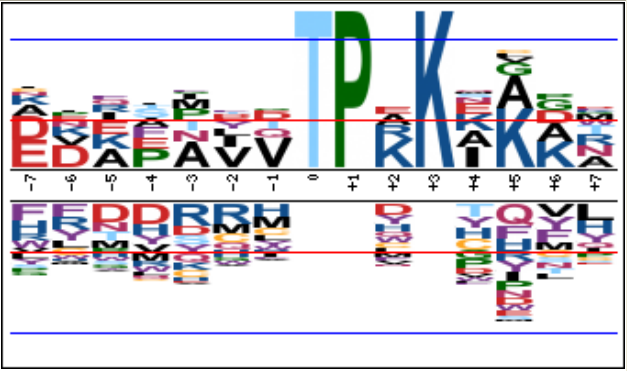

2.06

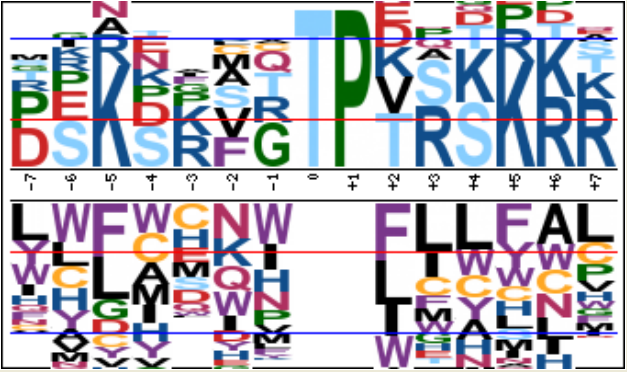

2.07

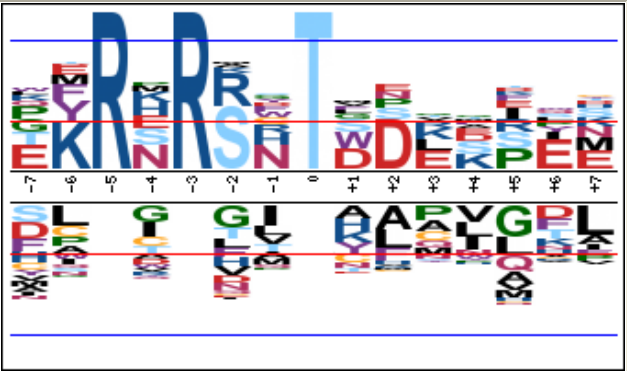

2.08

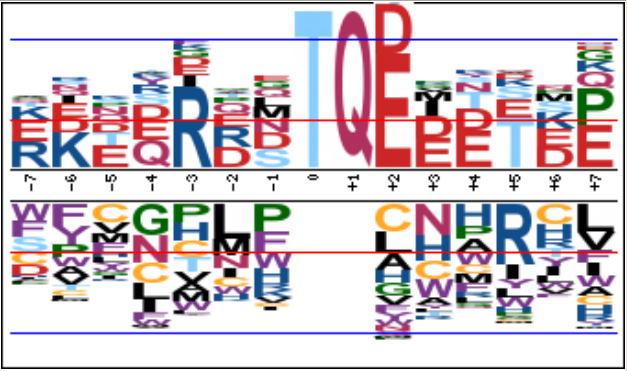

2.09

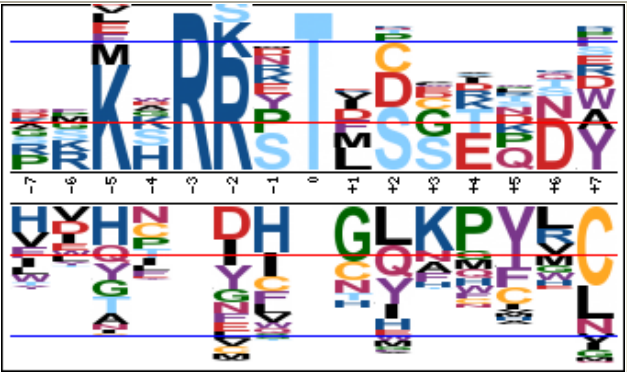

2.10

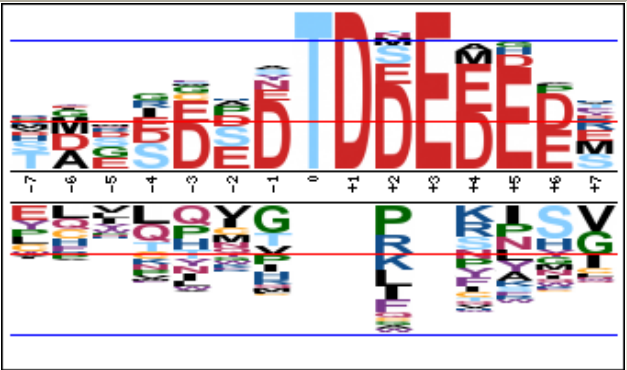

2.11

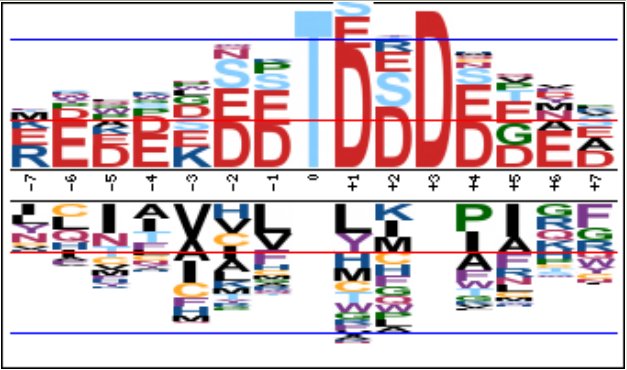

2.12

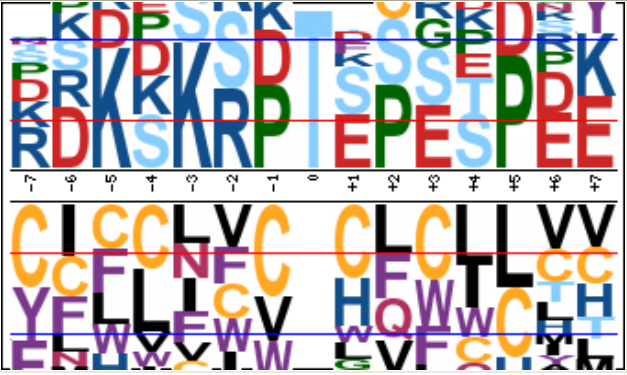

Supplement: M800332-MCP200_4.pdf [file M800332-MCP200_4.pdf]
