# Supplementary material
Source: PubMed Central journal article supplement (PMC2634583)

# xxxxmotif-xxxxx

v1.2 10.05.06

## Supplementary Table 5 Human Tyrosine Phosphorylation Motifs

### Tyrosine Phosphorylation Motifs

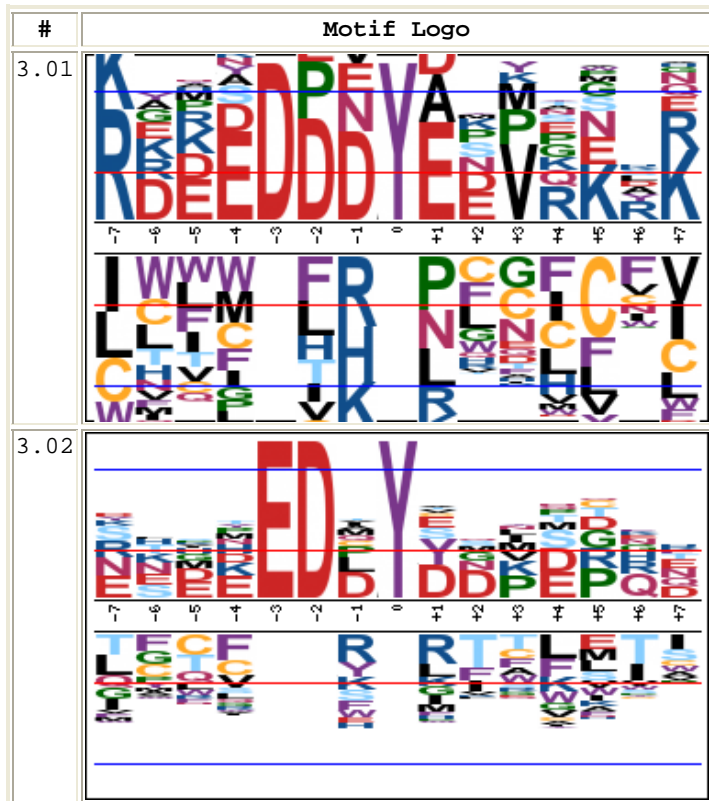

| #    | Motif                | Motif Score | Foreground Matches | Foreground Size | Background Matches | Background Size | Fold Increase | -Log(P) Value |
|------|----------------------|-------------|--------------------|-----------------|--------------------|-----------------|---------------|---------------|
| 3.01 | <u>...D..Y.....</u>  | 62.89       | 838                | 9524            | 14949              | 316251          | 1.86          | 62.8874       |
| 3.02 | <u>...ED.Y.....</u>  | 67.07       | 116                | 8686            | 1188               | 301302          | 3.39          | 27.4040       |
| 3.03 | <u>...E..Y.....</u>  | 39.75       | 890                | 8570            | 19668              | 300114          | 1.58          | 39.7484       |
| 3.04 | <u>.....YD.P....</u> | 47.29       | 70                 | 7680            | 543                | 280446          | 4.71          | 24.4580       |
| 3.05 | <u>.....YE.....</u>  | 32.59       | 694                | 7610            | 15890              | 279903          | 1.61          | 32.5939       |
| 3.06 | <u>.....DY.....</u>  | 31.25       | 576                | 6916            | 13148              | 264013          | 1.67          | 31.2490       |
| 3.07 | <u>...NP.Y.....</u>  | 31.32       | 67                 | 6340            | 695                | 250865          | 3.81          | 18.7536       |
| 3.08 | <u>...D..Y.....</u>  | 19.35       | 493                | 6273            | 12835              | 250170          | 1.53          | 19.3488       |
| 3.09 | <u>.....Y..P....</u> | 15.92       | 483                | 5780            | 13500              | 237335          | 1.47          | 15.9188       |
| 3.10 | <u>.....YD.....</u>  | 14.90       | 383                | 5297            | 10616              | 223835          | 1.52          | 14.9036       |
| 3.11 | <u>...E..Y.....</u>  | 13.85       | 436                | 4914            | 13014              | 213219          | 1.45          | 13.8475       |
| 3.12 | <u>.....EY.....</u>  | 13.26       | 373                | 4478            | 11205              | 200205          | 1.49          | 13.2553       |
| 3.13 | <u>...K..Y.....</u>  | 13.32       | 362                | 4105            | 11124              | 189000          | 1.50          | 13.3168       |
| 3.14 | <u>...D..Y.....</u>  | 12.56       | 290                | 3743            | 8852               | 177876          | 1.56          | 12.5631       |
| 3.15 | <u>...N..Y.....</u>  | 10.30       | 235                | 3453            | 7388               | 169024          | 1.56          | 10.2970       |
| 3.16 | <u>...G..Y.....</u>  | 10.98       | 324                | 3218            | 11116              | 161636          | 1.46          | 10.9832       |
| 3.17 | <u>.....Y.....</u>   | 0.00        | 2894               | 2894            | 150520             | 150520          | 1.00          | 0.0000        |

Motif search time: 43 seconds

3.03

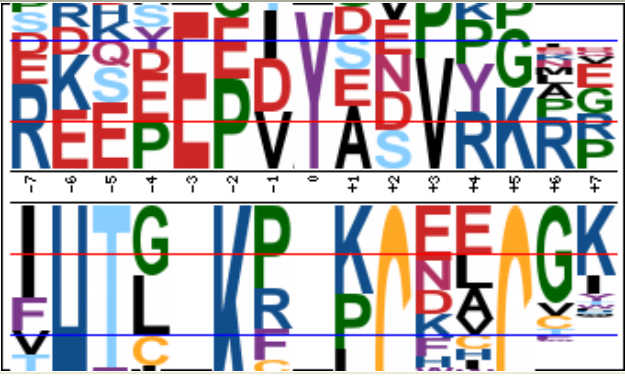

3.04

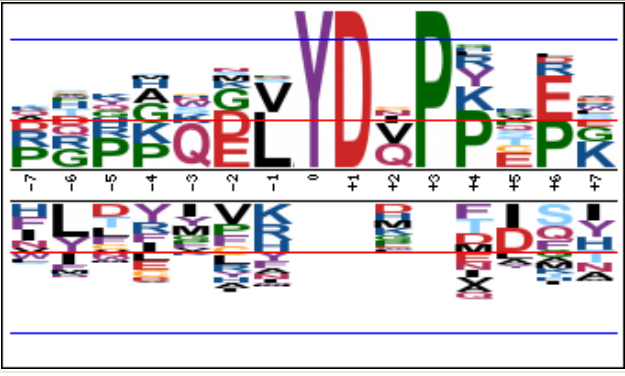

3.05

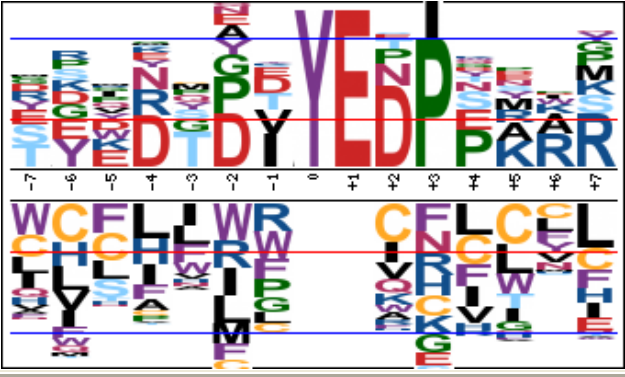

3.06

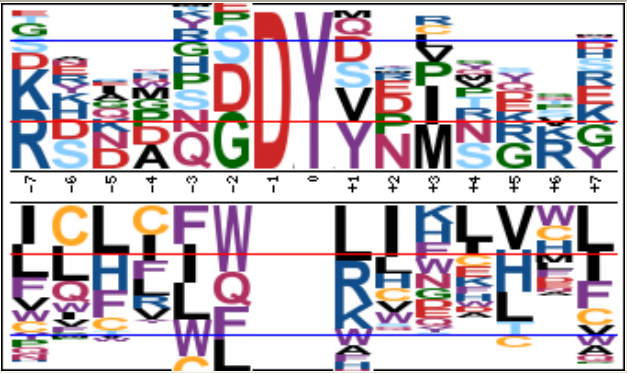

3.07

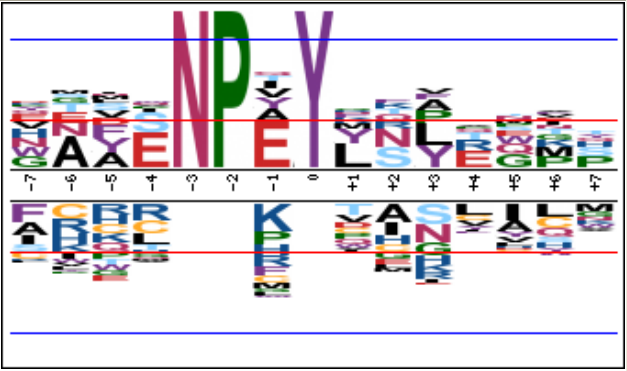

3.08

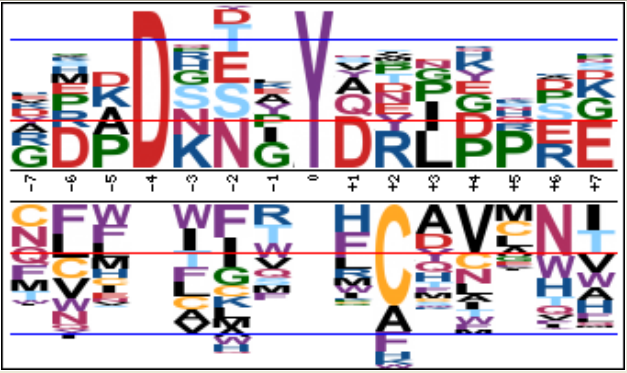

3.09

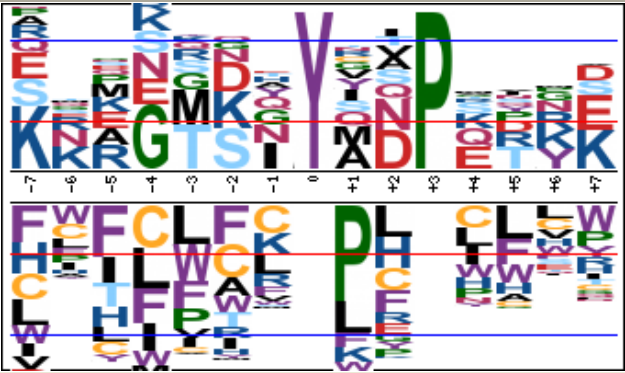

3.10

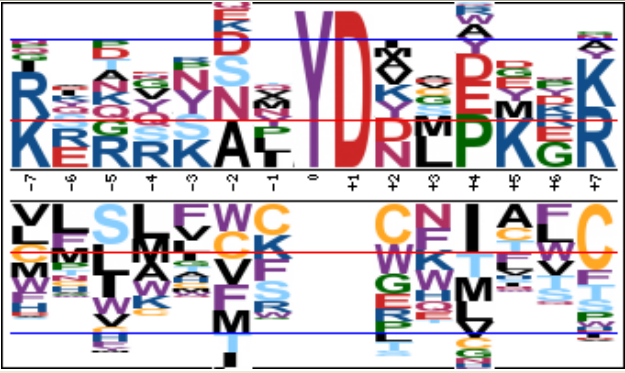

3.11

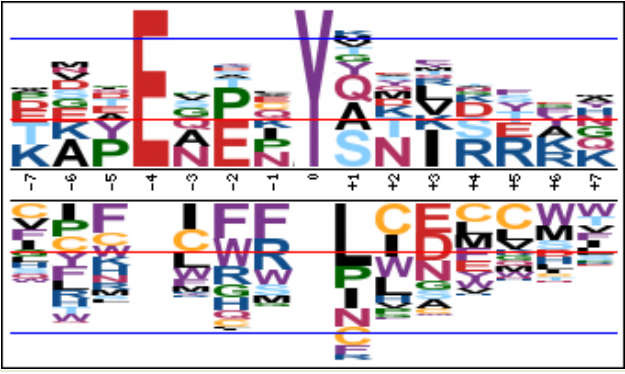

3.12

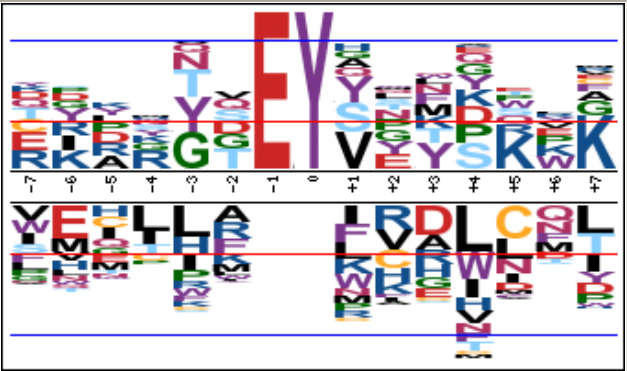

3.13

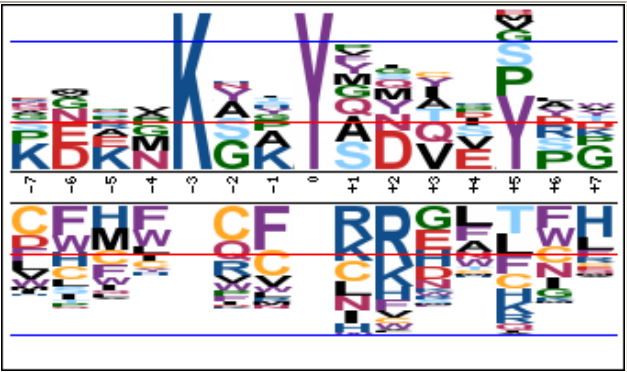

3.14

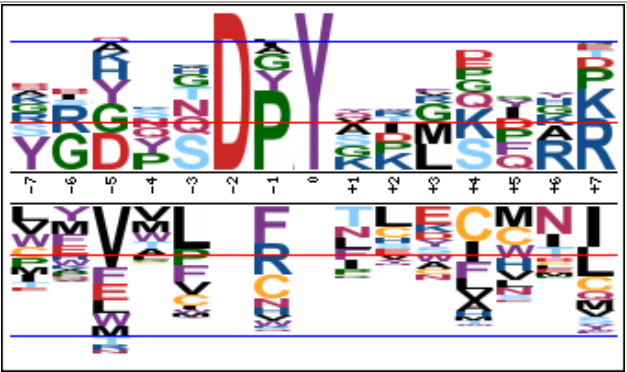

3.15

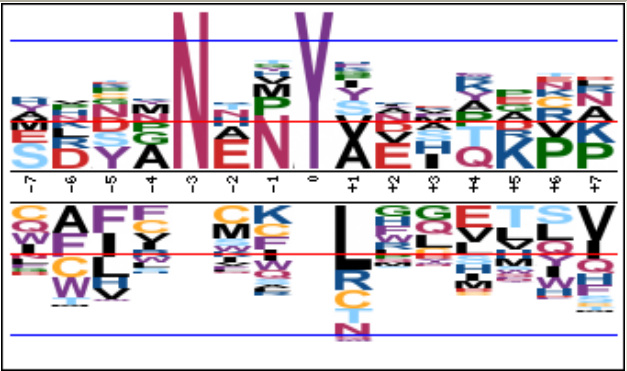

3.16

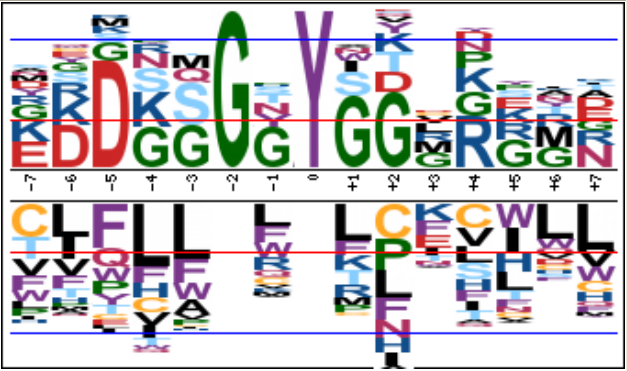

3.17

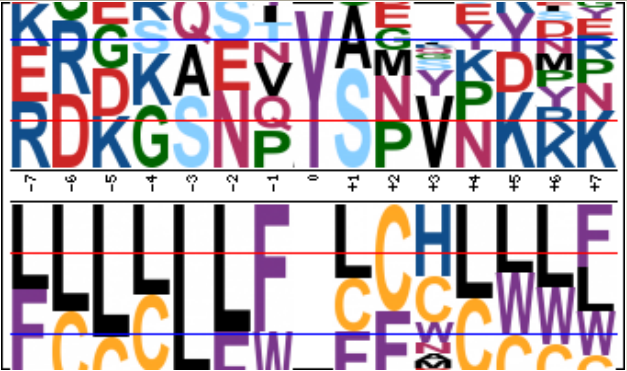

Supplement: M800332-MCP200_5.pdf [file M800332-MCP200_5.pdf]
