# Supplementary material
Source: PubMed Central journal article supplement (PMC2634583)

# xxxxmotif-xxxxx

v1.2 10.05.06

## Supplementary Table 6 Yeast Serine and Threonine Phosphorylation Motifs from Albuquerque et al.

### Serine Motifs

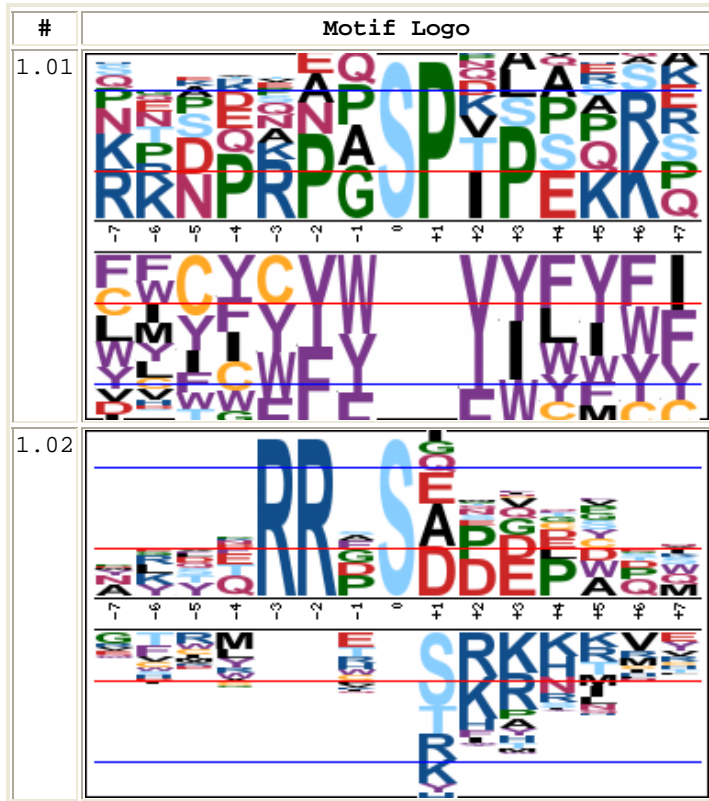

| #    | Motif                         | Motif Score | Foreground Matches | Foreground Size | Background Matches | Background Size | Fold Increase | -Log(P) Value |
|------|-------------------------------|-------------|--------------------|-----------------|--------------------|-----------------|---------------|---------------|
| 1.01 | <a href="#">.....sP.....</a>  | 324.00      | 1150               | 4893            | 9280               | 233322          | 5.91          | 324.0000      |
| 1.02 | <a href="#">....RR.s.....</a> | 196.23      | 115                | 3743            | 699                | 224042          | 9.85          | 71.3662       |
| 1.03 | <a href="#">....R.s.....</a>  | 124.97      | 515                | 3628            | 9382               | 223343          | 3.38          | 124.9708      |
| 1.04 | <a href="#">.....sD.E....</a> | 179.68      | 184                | 3113            | 982                | 213961          | 12.88         | 134.0512      |
| 1.05 | <a href="#">.....sD.D....</a> | 82.28       | 102                | 2929            | 886                | 212979          | 8.37          | 57.0677       |
| 1.06 | <a href="#">.....sE.E....</a> | 71.92       | 93                 | 2827            | 961                | 212093          | 7.26          | 47.0587       |
| 1.07 | <a href="#">.....s.E.....</a> | 36.62       | 336                | 2734            | 12246              | 211132          | 2.12          | 36.6174       |
| 1.08 | <a href="#">.....s.D.....</a> | 33.56       | 299                | 2398            | 11575              | 198886          | 2.14          | 33.5644       |
| 1.09 | <a href="#">.R.S.s.....</a>   | 43.42       | 69                 | 2099            | 1145               | 187311          | 5.38          | 27.5752       |
| 1.10 | <a href="#">.....s.P.....</a> | 24.45       | 219                | 2030            | 9404               | 186166          | 2.14          | 24.4474       |
| 1.11 | <a href="#">.....sF.....</a>  | 21.65       | 178                | 1811            | 7827               | 176762          | 2.22          | 21.6509       |
| 1.12 | <a href="#">.....s.D....</a>  | 14.17       | 167                | 1633            | 9120               | 168935          | 1.89          | 14.1740       |
| 1.13 | <a href="#">.....s.E....</a>  | 14.05       | 158                | 1466            | 8953               | 159815          | 1.92          | 14.0538       |
| 1.14 | <a href="#">.....s.N....</a>  | 12.13       | 176                | 1308            | 11629              | 150862          | 1.75          | 12.1348       |
| 1.15 | <a href="#">.....s.S....</a>  | 13.82       | 258                | 1132            | 19907              | 139233          | 1.59          | 13.8238       |
| 1.16 | <a href="#">.....s.....</a>   | 0.00        | 874                | 874             | 119326             | 119326          | 1.00          | 0.0000        |

Motif search time: 34 seconds

1.03

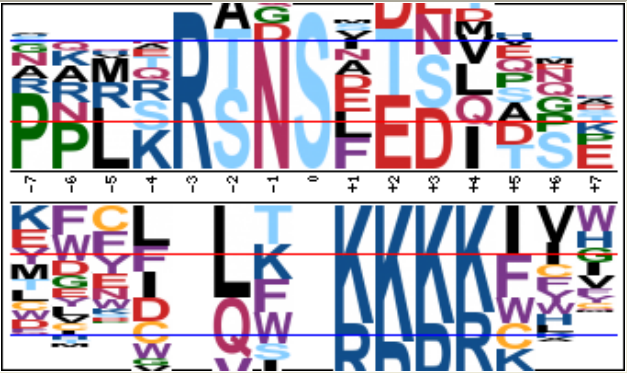

1.04

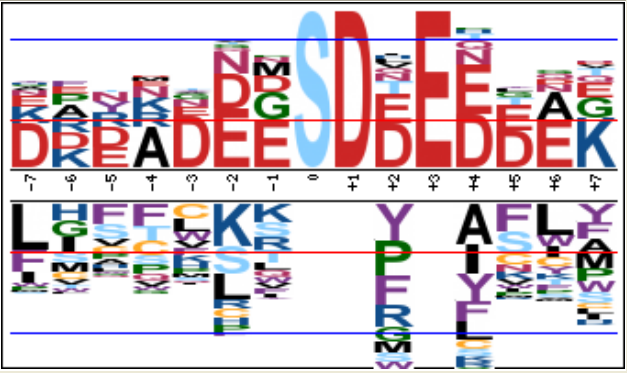

1.05

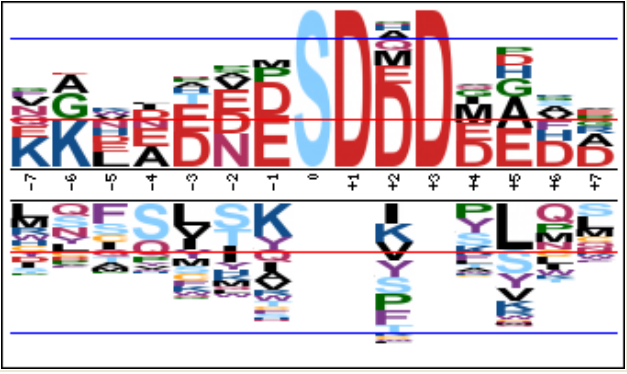

1.06

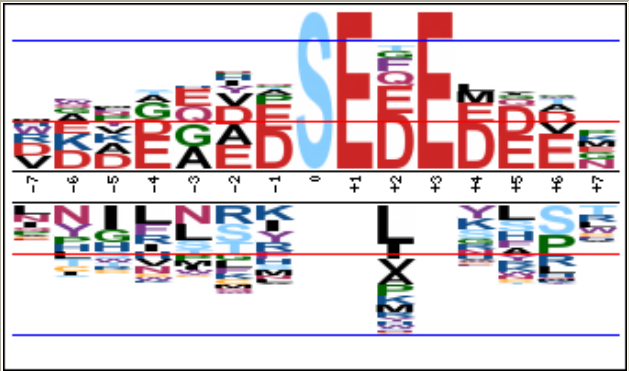

1.07

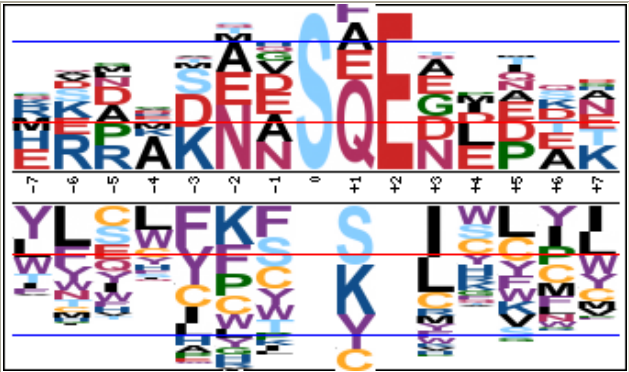

1.08

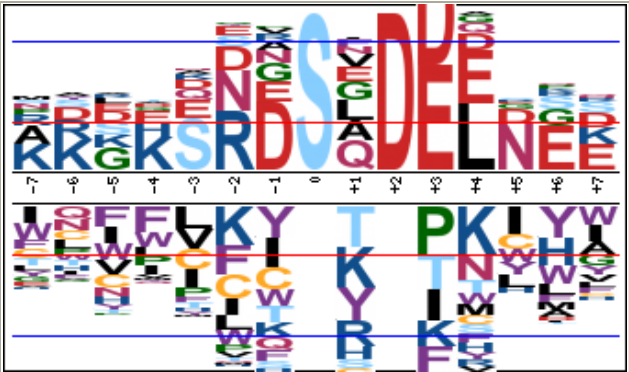

1.09

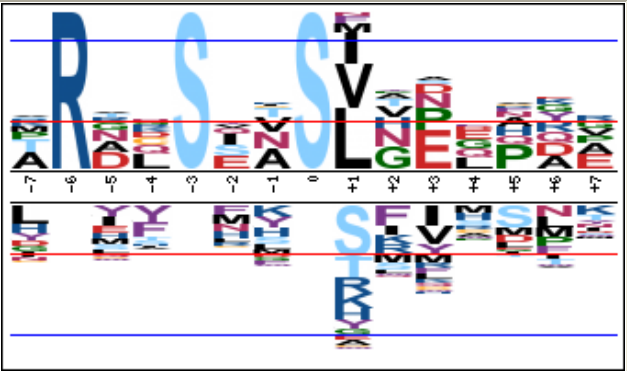

1.10

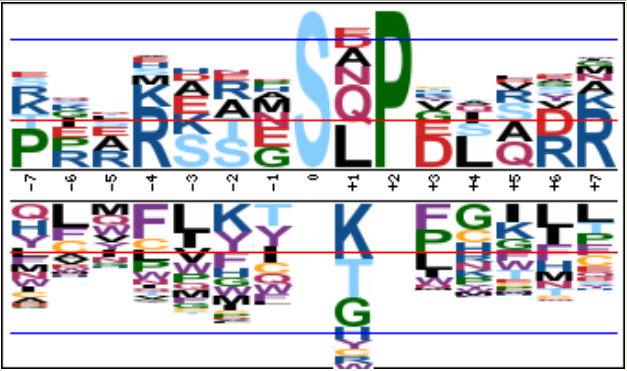

1.11

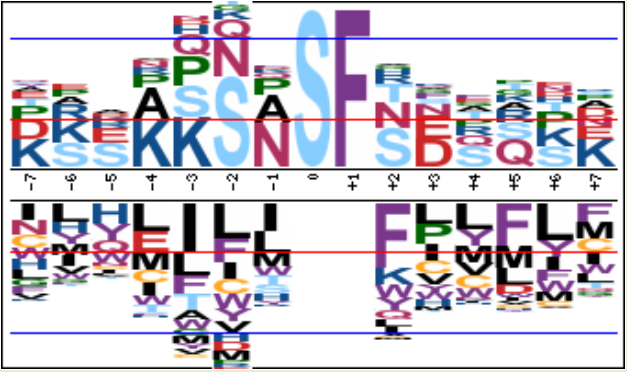

1.12

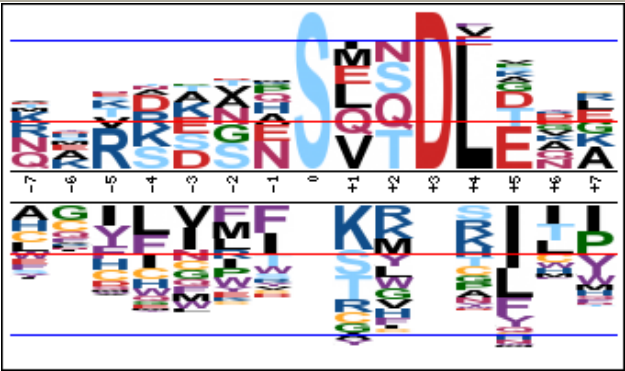

1.13

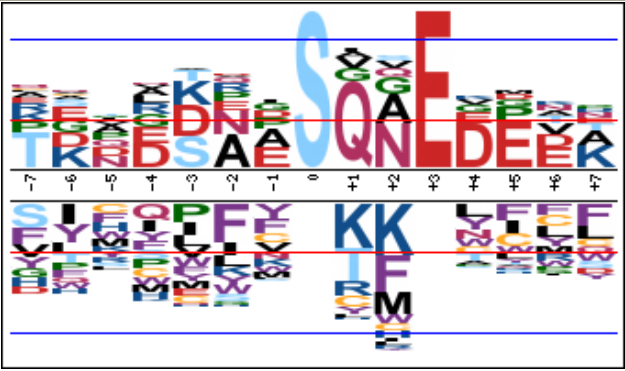

1.14

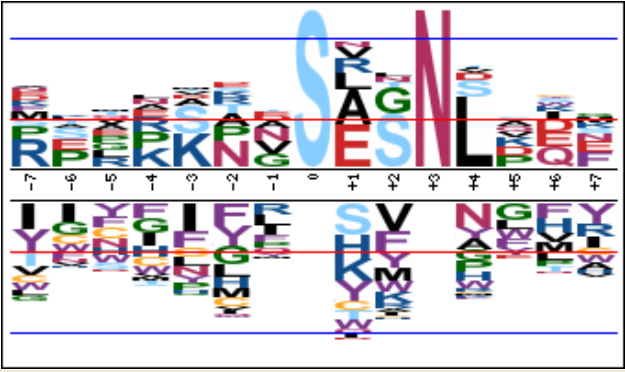



# Threonine Motifs

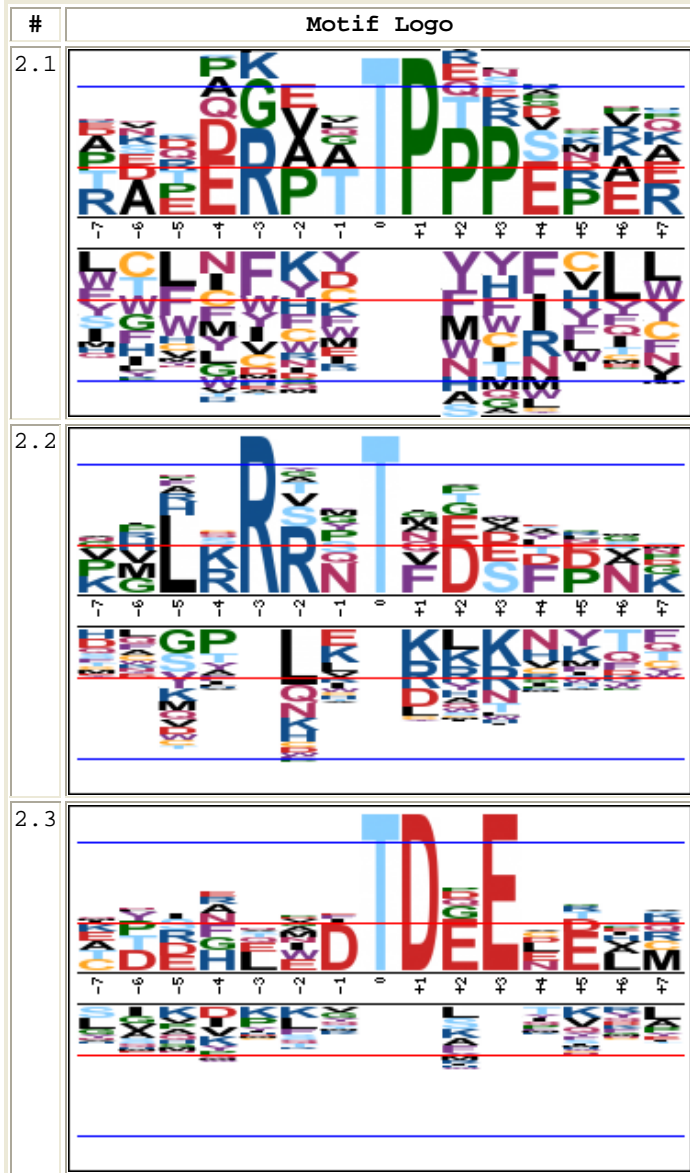

| #   | Motif         | Motif Score | Foreground Matches | Foreground Size | Background Matches | Background Size | Fold Increase | -Log(P) Value |
|-----|---------------|-------------|--------------------|-----------------|--------------------|-----------------|---------------|---------------|
| 2.1 | .....tP.....  | 256.30      | 385                | 874             | 7532               | 153934          | 9.00          | 256.2975      |
| 2.2 | ....R..t..... | 32.60       | 91                 | 489             | 6017               | 146402          | 4.53          | 32.5950       |
| 2.3 | .....tD.E.... | 25.71       | 25                 | 398             | 593                | 140385          | 14.87         | 20.5430       |
| 2.4 | .....t.....   | 0.00        | 373                | 373             | 139792             | 139792          | 1.00          | 0.0000        |

Motif search time: 10 seconds

2.4

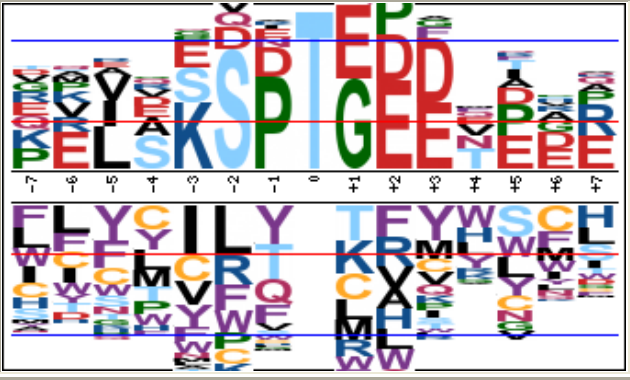

Supplement: M800332-MCP200_6.pdf [file M800332-MCP200_6.pdf]
