# Supplementary material
Source: PubMed Central journal article supplement (PMC2634583)

# xxxxmotif-xxxxx

v1.2 10.05.06

## Supplementary Table 7 Fly Serine and Threonine Phosphorylation Motifs from Zhai et al.

### Serine Motifs

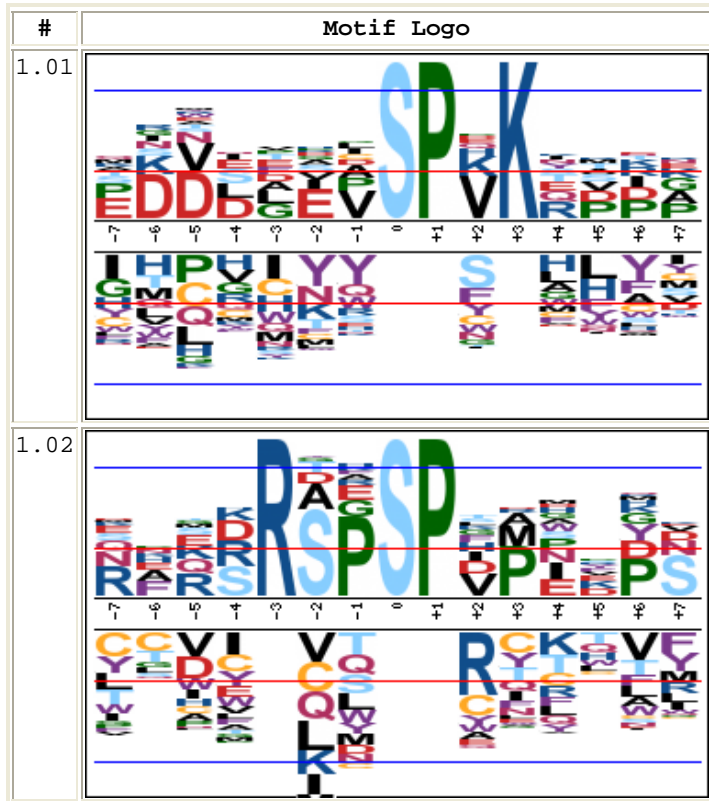

| #    | Motif                          | Motif Score | Foreground Matches | Foreground Size | Background Matches | Background Size | Fold Increase | -Log(P) Value |
|------|--------------------------------|-------------|--------------------|-----------------|--------------------|-----------------|---------------|---------------|
| 1.01 | <a href="#">.....sP.K....</a>  | 356.66      | 227                | 8081            | 1593               | 589119          | 10.39         | 144.3337      |
| 1.02 | <a href="#">....R.sP.....</a>  | 359.69      | 243                | 7854            | 1835               | 587526          | 9.91          | 150.0018      |
| 1.03 | <a href="#">.....KsP.....</a>  | 336.09      | 128                | 7611            | 1310               | 585691          | 7.52          | 65.6954       |
| 1.04 | <a href="#">.....sP.R....</a>  | 335.89      | 128                | 7483            | 1387               | 584381          | 7.21          | 63.6574       |
| 1.05 | <a href="#">....K.sP.....</a>  | 314.00      | 113                | 7355            | 1182               | 582994          | 7.58          | 58.4378       |
| 1.06 | <a href="#">.....RsP.....</a>  | 266.06      | 104                | 7242            | 1230               | 581812          | 6.79          | 49.5907       |
| 1.07 | <a href="#">.....sD.ED...</a>  | 376.81      | 84                 | 7138            | 263                | 580582          | 25.98         | 85.2926       |
| 1.08 | <a href="#">.....sP.....</a>   | 220.23      | 941                | 7054            | 23368              | 580319          | 3.31          | 220.2275      |
| 1.09 | <a href="#">.....sD.E....</a>  | 321.04      | 284                | 6113            | 2476               | 556951          | 10.45         | 181.8571      |
| 1.10 | <a href="#">.....sDDD....</a>  | 308.83      | 72                 | 5829            | 251                | 554475          | 27.29         | 74.7547       |
| 1.11 | <a href="#">...RR.s.....</a>   | 243.27      | 232                | 5757            | 2830               | 554224          | 7.89          | 123.2503      |
| 1.12 | <a href="#">.....sD.D....</a>  | 232.81      | 205                | 5525            | 2056               | 551394          | 9.95          | 127.3375      |
| 1.13 | <a href="#">.....sEDE....</a>  | 221.28      | 62                 | 5320            | 253                | 549338          | 25.30         | 62.5578       |
| 1.14 | <a href="#">.....s.DD....</a>  | 166.37      | 145                | 5258            | 1795               | 549085          | 8.44          | 80.8835       |
| 1.15 | <a href="#">.....Ds..E....</a> | 158.88      | 129                | 5113            | 1733               | 547290          | 7.97          | 69.2184       |
| 1.16 | <a href="#">...RK.s.....</a>   | 152.70      | 130                | 4984            | 1822               | 545557          | 7.81          | 68.7751       |
| 1.17 | <a href="#">.....s.E..D...</a> | 142.54      | 114                | 4854            | 1853               | 543735          | 6.89          | 55.0287       |
| 1.18 | <a href="#">.....D.s.E....</a> | 101.55      | 90                 | 4740            | 1750               | 541882          | 5.88          | 38.3532       |
| 1.19 | <a href="#">..R.R.s.....</a>   | 100.52      | 109                | 4650            | 2352               | 540132          | 5.38          | 42.8371       |
| 1.20 | <a href="#">.....s.DE....</a>  | 105.37      | 107                | 4541            | 1718               | 537780          | 7.38          | 54.4478       |
| 1.21 | <a href="#">.....s.ED....</a>  | 76.94       | 77                 | 4434            | 1767               | 536062          | 5.27          | 29.9184       |

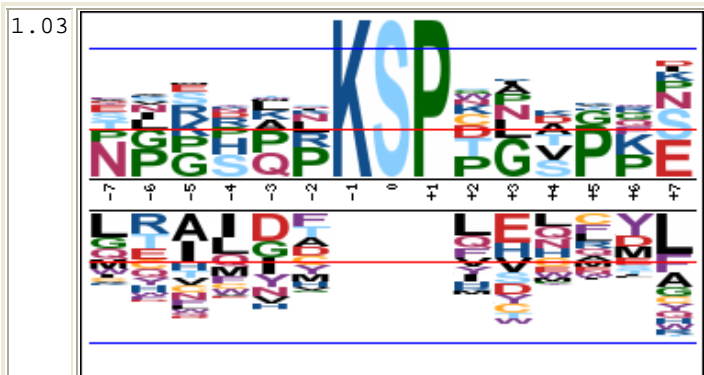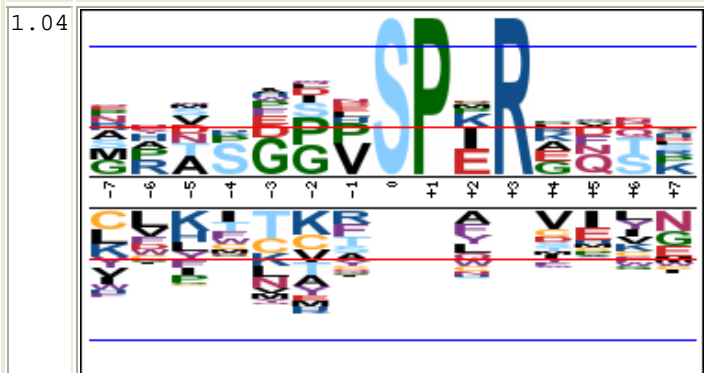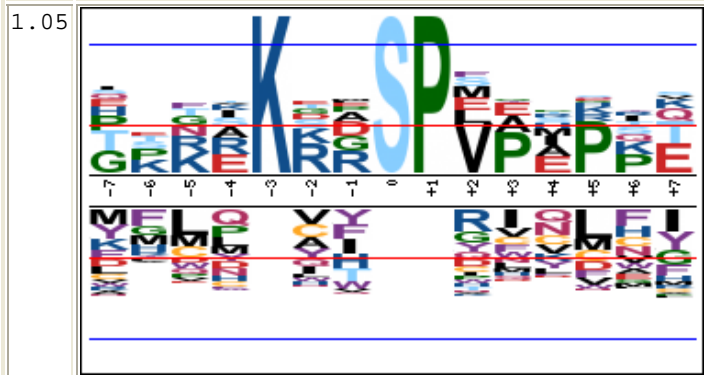

|      |                      |       |     |      |        |        |      |         |
|------|----------------------|-------|-----|------|--------|--------|------|---------|
| 1.22 | <u>.R..R..s.....</u> | 69.75 | 74  | 4357 | 1676   | 534295 | 5.41 | 29.5082 |
| 1.23 | <u>.....DsD.....</u> | 81.86 | 91  | 4283 | 1405   | 532619 | 8.05 | 49.4786 |
| 1.24 | <u>.....sE.E....</u> | 72.15 | 110 | 4192 | 2462   | 531214 | 5.66 | 45.2531 |
| 1.25 | <u>.....s.DS....</u> | 79.45 | 119 | 4082 | 3013   | 528752 | 5.12 | 44.6173 |
| 1.26 | <u>.R..S..s.....</u> | 74.16 | 130 | 3963 | 3611   | 525739 | 4.78 | 45.5802 |
| 1.27 | <u>.....s..D.D..</u> | 57.08 | 67  | 3833 | 1529   | 522128 | 5.97 | 29.1723 |
| 1.28 | <u>.....s...DE..</u> | 56.81 | 73  | 3766 | 1921   | 520599 | 5.25 | 28.3640 |
| 1.29 | <u>...R..s.....</u>  | 43.85 | 349 | 3693 | 21450  | 518678 | 2.29 | 43.8474 |
| 1.30 | <u>...KR.s.....</u>  | 57.37 | 75  | 3344 | 1844   | 497228 | 6.05 | 32.9466 |
| 1.31 | <u>...S..sL.....</u> | 56.36 | 119 | 3269 | 4511   | 495384 | 4.00 | 34.7096 |
| 1.32 | <u>.....s.E.....</u> | 38.46 | 329 | 3150 | 23314  | 490873 | 2.20 | 38.4580 |
| 1.33 | <u>.....D.s.....</u> | 41.06 | 309 | 2821 | 21931  | 467559 | 2.34 | 41.0607 |
| 1.34 | <u>.....N.s.....</u> | 30.38 | 280 | 2512 | 23478  | 445628 | 2.12 | 30.3772 |
| 1.35 | <u>.....RRs.....</u> | 44.51 | 68  | 2232 | 2010   | 422150 | 6.40 | 31.4605 |
| 1.36 | <u>.....s....D..</u> | 26.16 | 213 | 2164 | 18473  | 420140 | 2.24 | 26.1555 |
| 1.37 | <u>.....s..D....</u> | 23.42 | 190 | 1951 | 17477  | 401667 | 2.24 | 23.4236 |
| 1.38 | <u>.....s..S....</u> | 21.41 | 356 | 1761 | 46565  | 384190 | 1.67 | 21.4131 |
| 1.39 | <u>...S..s.....</u>  | 21.26 | 266 | 1405 | 34944  | 337625 | 1.83 | 21.2586 |
| 1.40 | <u>.....s.SP....</u> | 39.58 | 64  | 1139 | 2279   | 302681 | 7.46 | 33.6271 |
| 1.41 | <u>.....SS.E....</u> | 28.35 | 47  | 1075 | 2037   | 300402 | 6.45 | 22.2784 |
| 1.42 | <u>.....s.D.....</u> | 17.17 | 119 | 1028 | 14493  | 298365 | 2.38 | 17.1700 |
| 1.43 | <u>.....s...SP..</u> | 23.08 | 40  | 909  | 1874   | 283872 | 6.67 | 19.5954 |
| 1.44 | <u>.....s.....</u>   | 0.00  | 869 | 869  | 281998 | 281998 | 1.00 | 0.0000  |

Motif search time: 2 minutes, 42 seconds

1.06

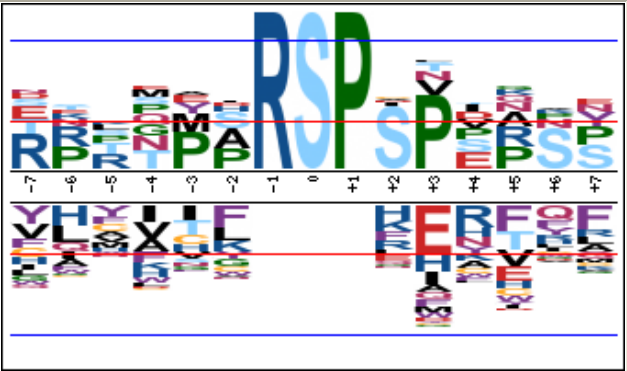

1.07

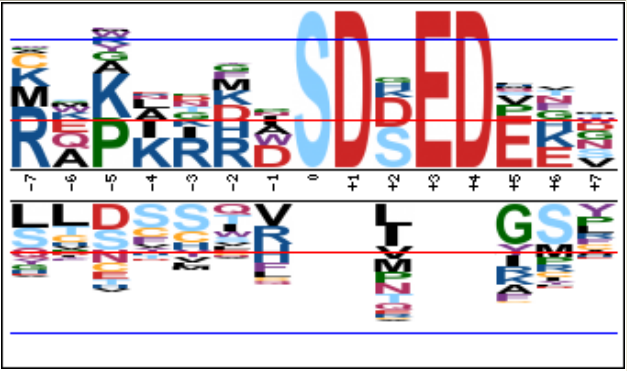

1.08

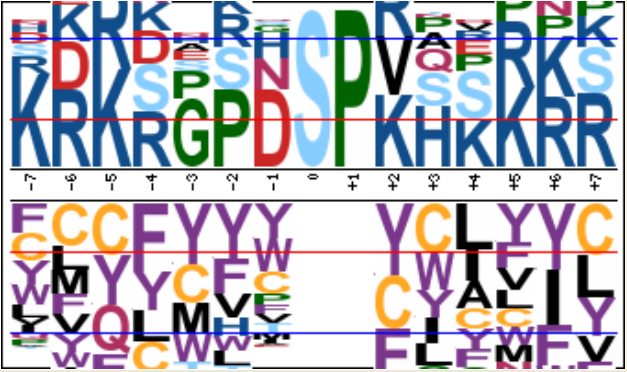

1.09

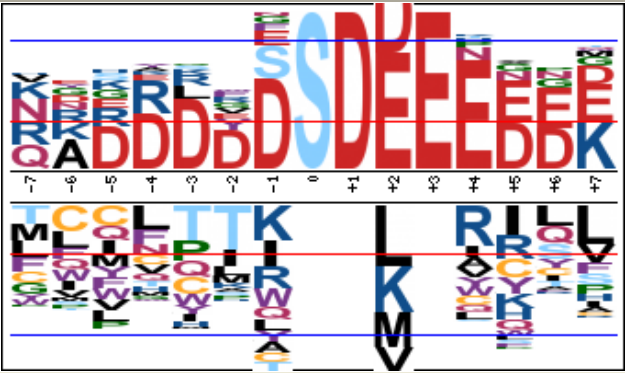

1.10

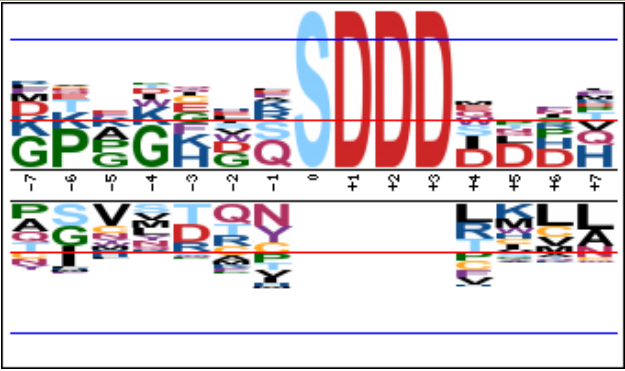

1.11

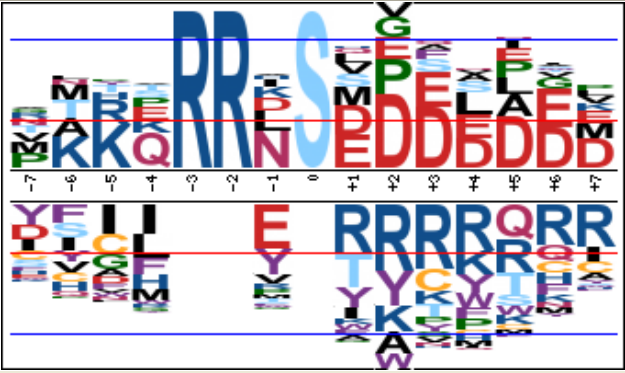

1.12

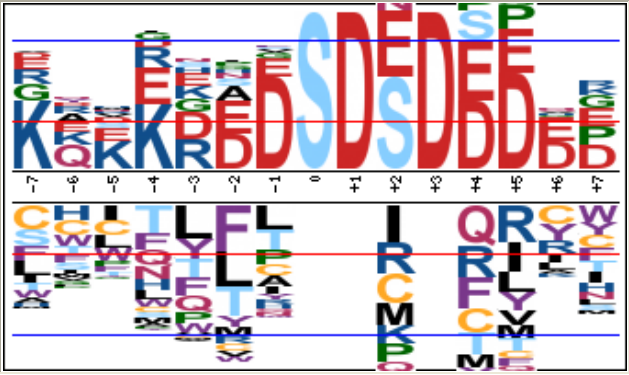

1.13

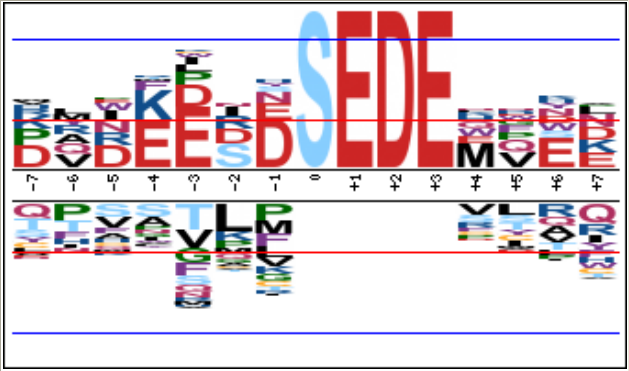

1.14

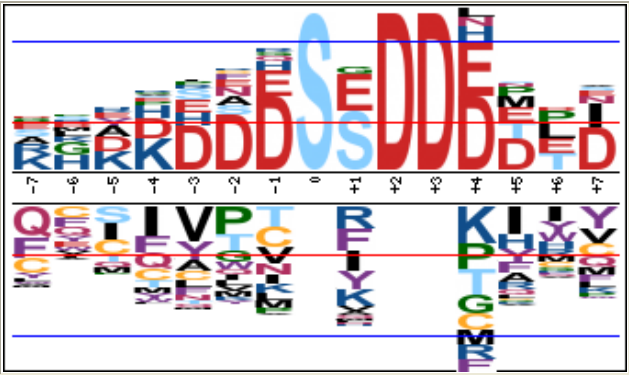

1.15

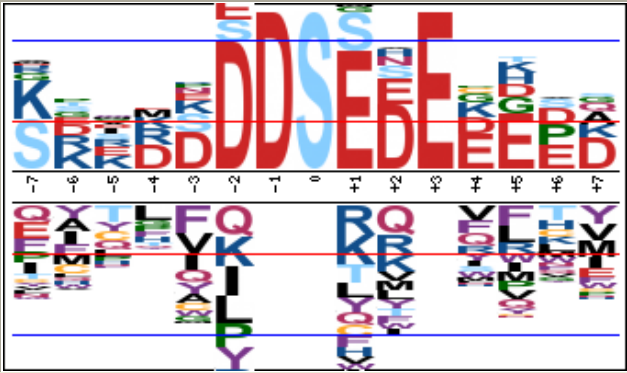

1.16

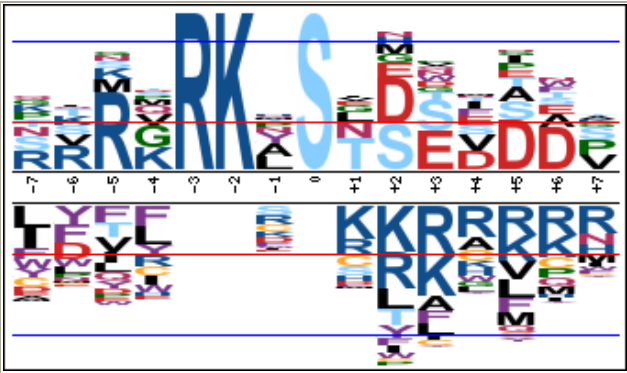

1.17

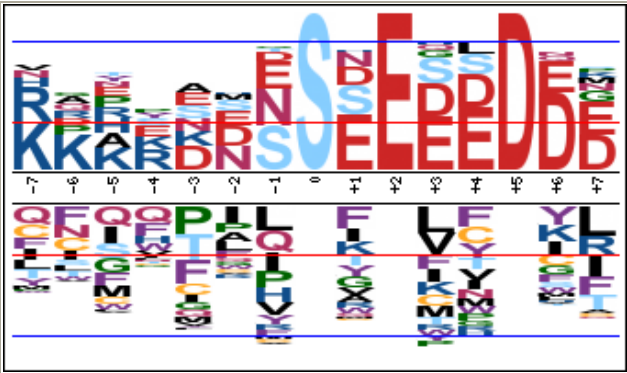

1.18

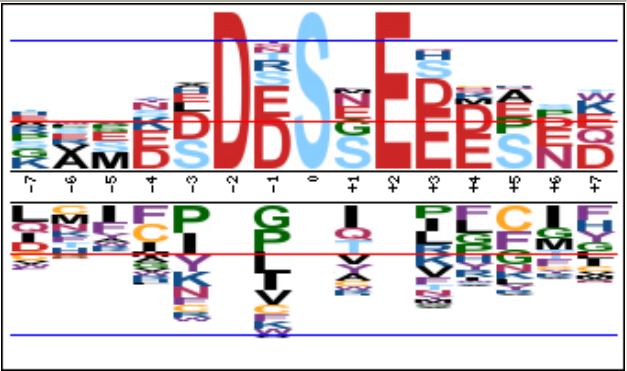

1.19

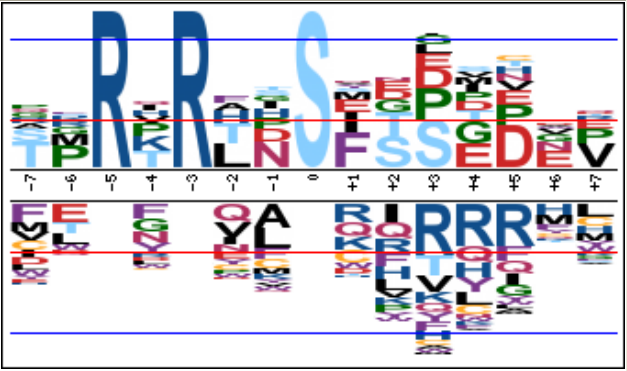

1.20

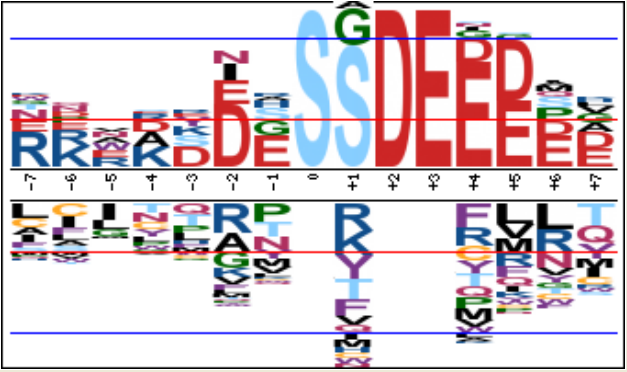

1.21

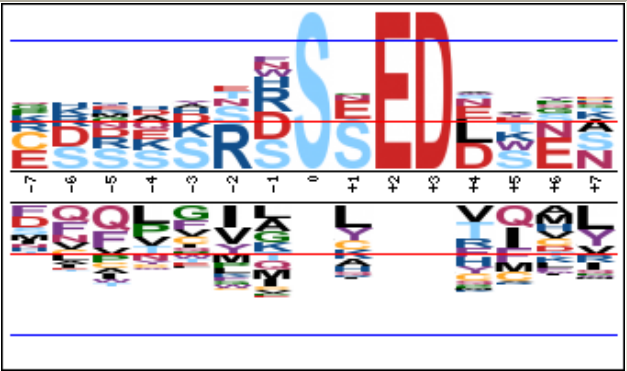

1.22

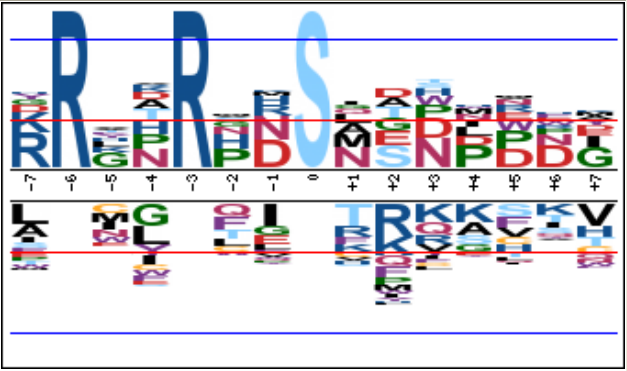

1.23

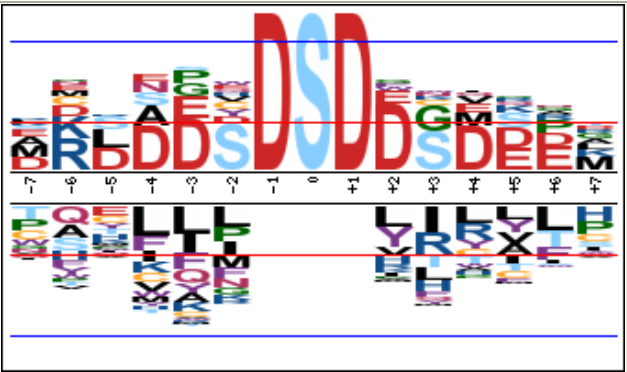



1.24

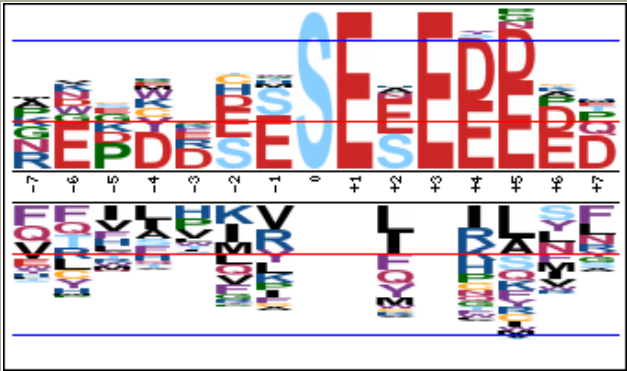

1.25

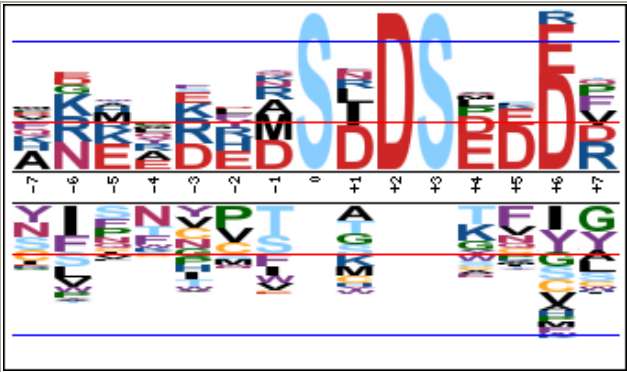

1.26

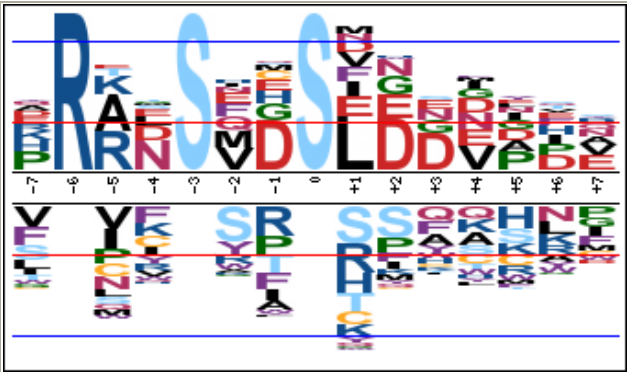

1.27

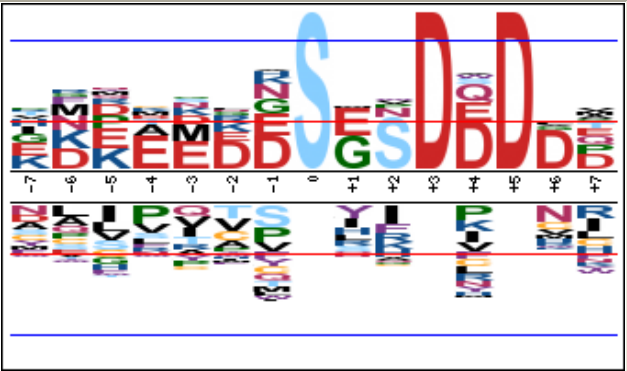

1.28

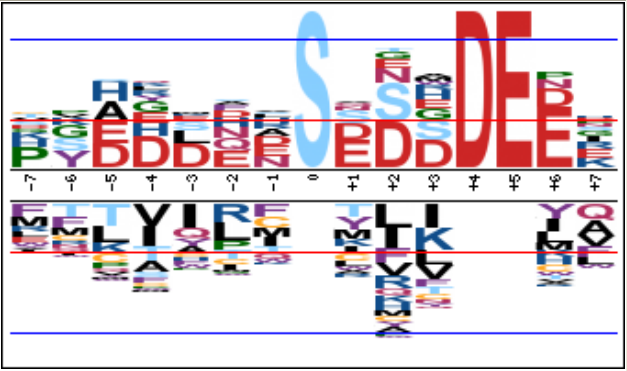

1.29

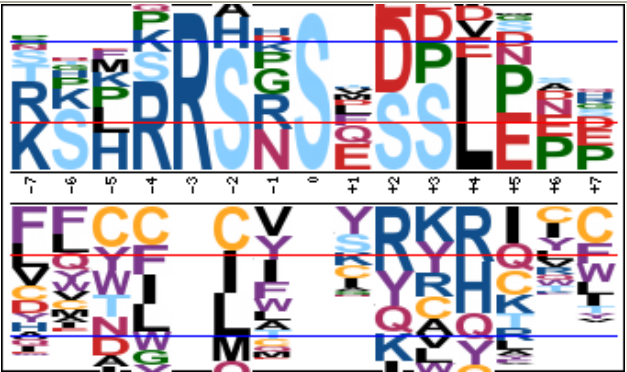

1.30

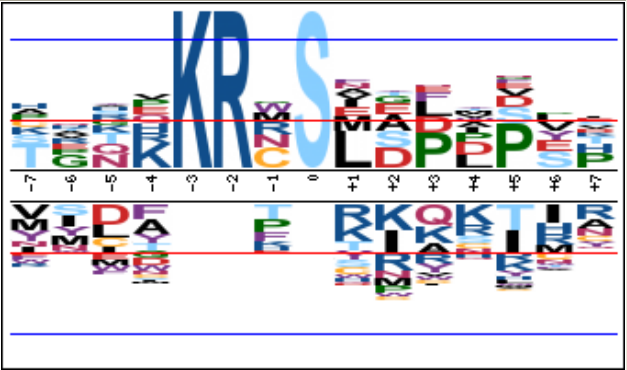

1.31

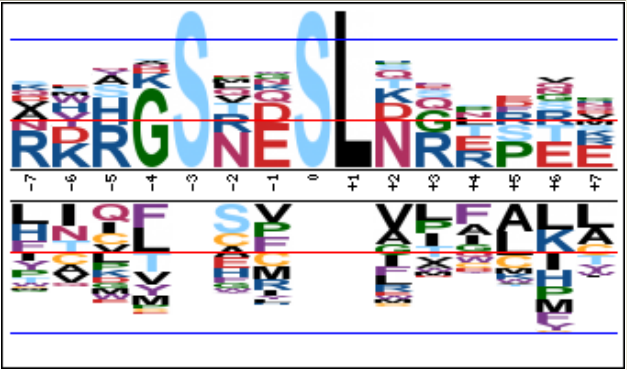

1.32

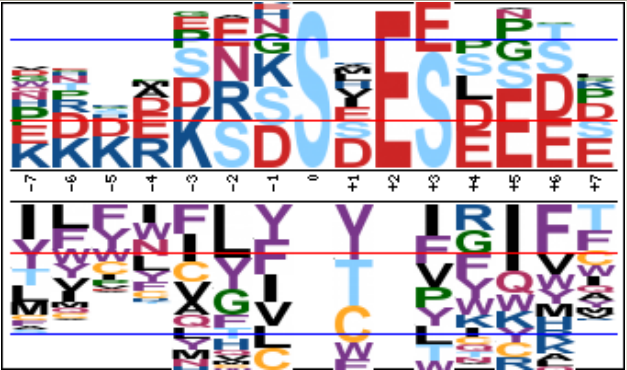

1.33

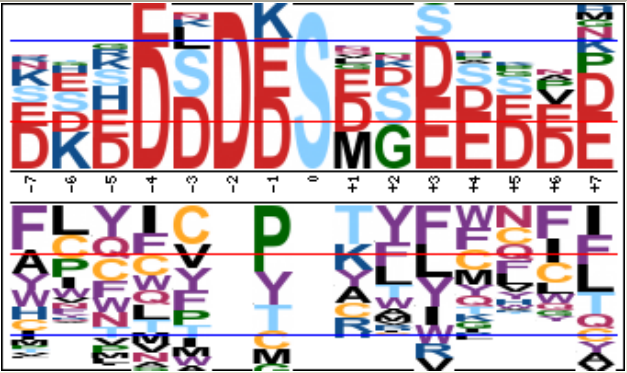

1.34

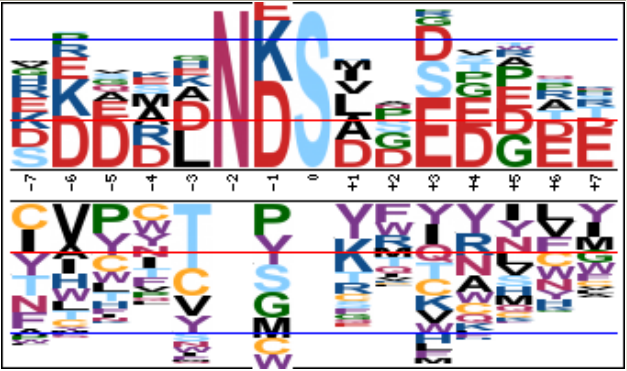

1.35

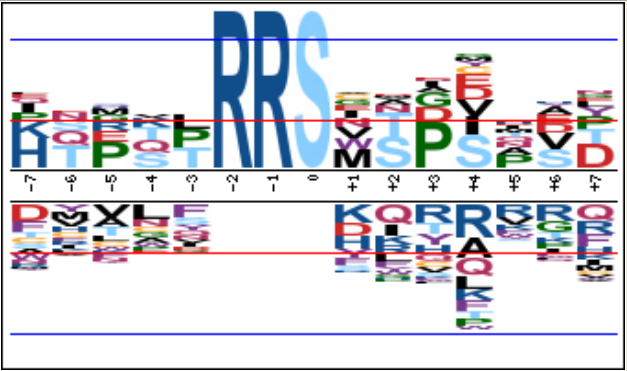

1.36

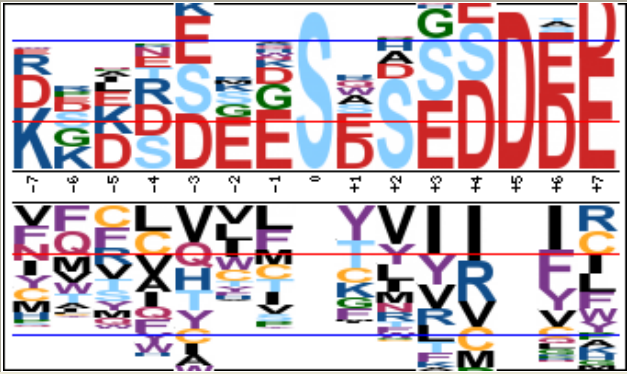

1.37

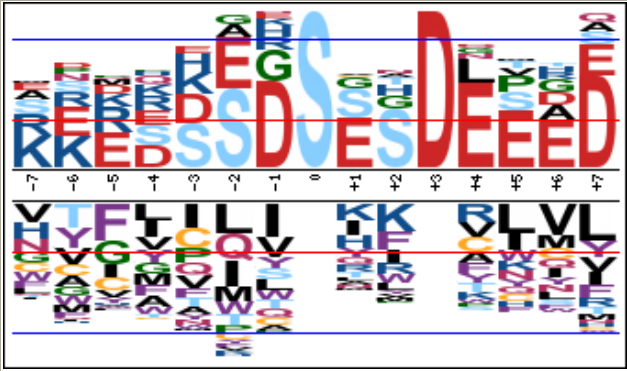

1.38

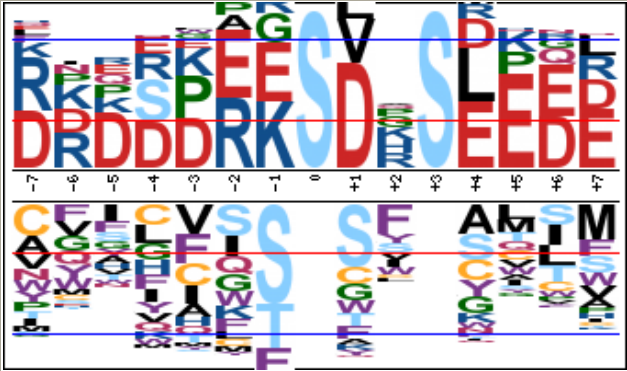

1.39

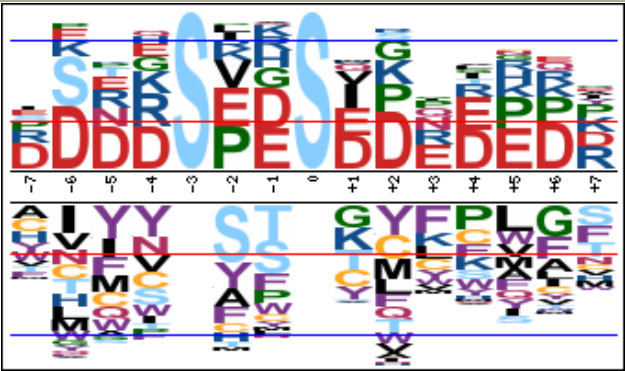

1.40

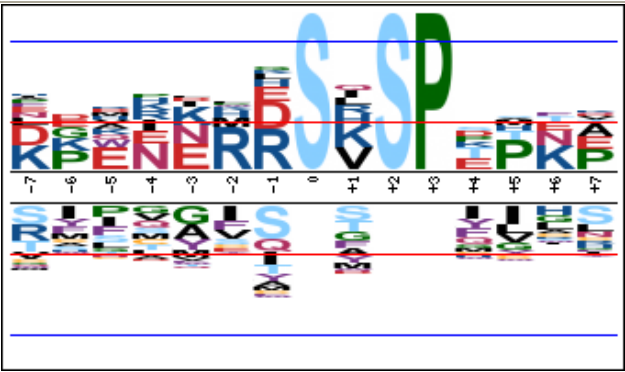

1.41

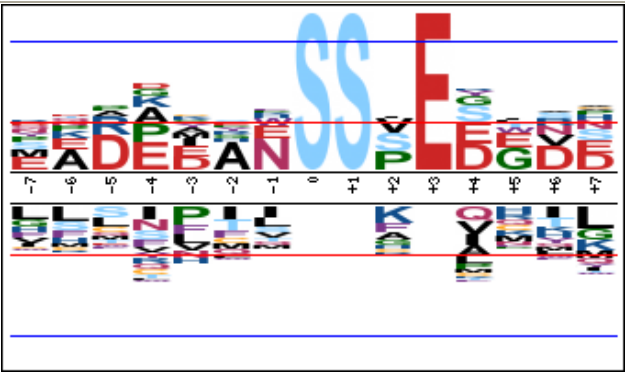

1.42

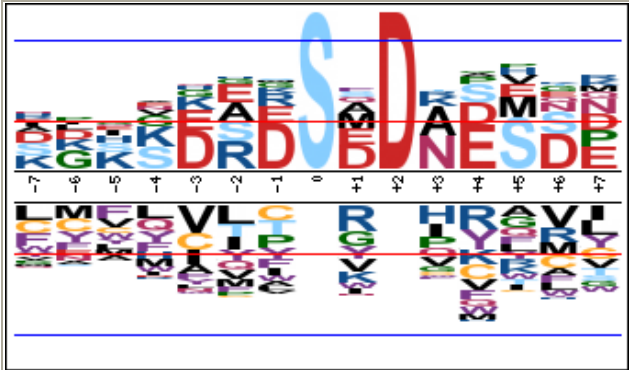

1.43

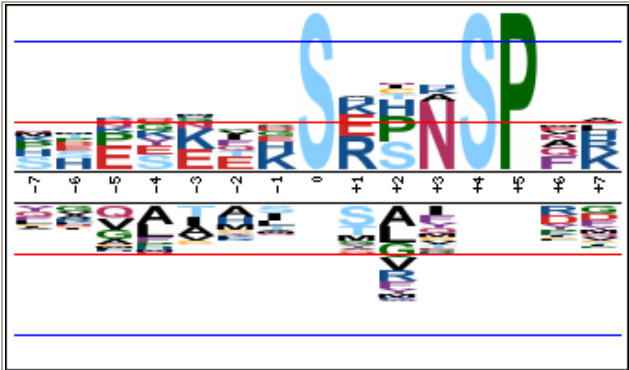

1.44

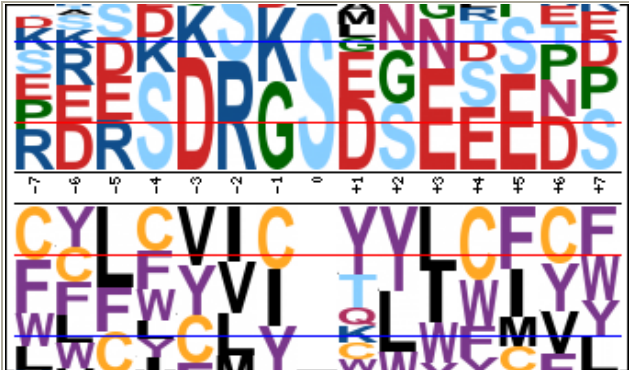

# Threonine Motifs

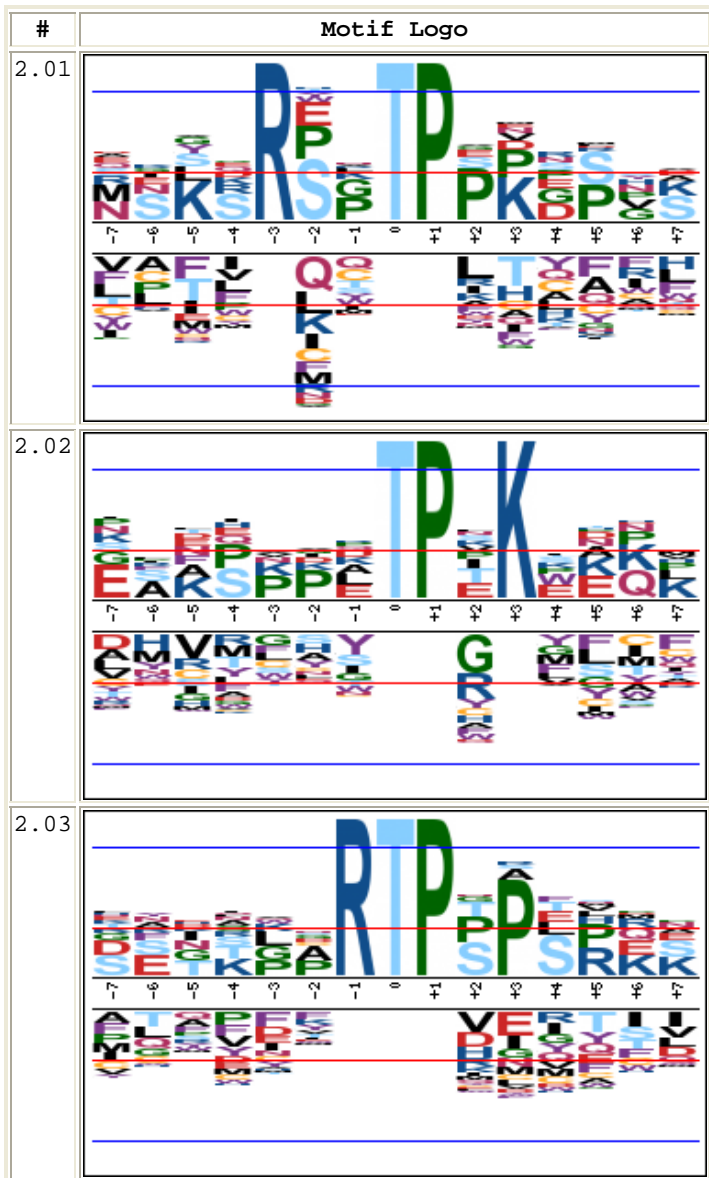

| #    | Motif                 | Motif Score | Foreground Matches | Foreground Size | Background Matches | Background Size | Fold Increase | -Log(P) Value |
|------|-----------------------|-------------|--------------------|-----------------|--------------------|-----------------|---------------|---------------|
| 2.01 | <u>....R..tP.....</u> | 355.78      | 123                | 1591            | 1344               | 403741          | 23.22         | 120.2477      |
| 2.02 | <u>.....tP.K....</u>  | 343.24      | 108                | 1468            | 1318               | 402397          | 22.46         | 104.1398      |
| 2.03 | <u>.....RtP.....</u>  | 253.25      | 66                 | 1360            | 1111               | 401079          | 17.52         | 56.9495       |
| 2.04 | <u>.....KtP.....</u>  | 208.87      | 58                 | 1294            | 1077               | 399968          | 16.65         | 48.9132       |
| 2.05 | <u>.....tP.....</u>   | 160.08      | 372                | 1236            | 22405              | 398891          | 5.36          | 160.0779      |
| 2.06 | <u>.....tD.E....</u>  | 65.92       | 56                 | 864             | 1565               | 376486          | 15.59         | 45.9827       |
| 2.07 | <u>.....DtD.....</u>  | 35.56       | 29                 | 808             | 943                | 374921          | 14.27         | 23.0585       |
| 2.08 | <u>.....tS.E....</u>  | 32.29       | 37                 | 779             | 1935               | 373978          | 9.18          | 22.7425       |
| 2.09 | <u>.....t..D....</u>  | 15.44       | 95                 | 742             | 18910              | 372043          | 2.52          | 15.4432       |
| 2.10 | <u>.....t..E....</u>  | 11.44       | 84                 | 647             | 20174              | 353133          | 2.27          | 11.4393       |
| 2.11 | <u>.....t.....</u>    | 0.00        | 563                | 563             | 332959             | 332959          | 1.00          | 0.0000        |

Motif search time: 41 seconds



2.04

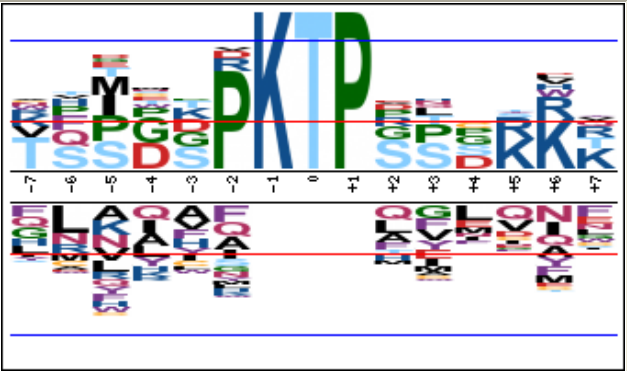

2.05

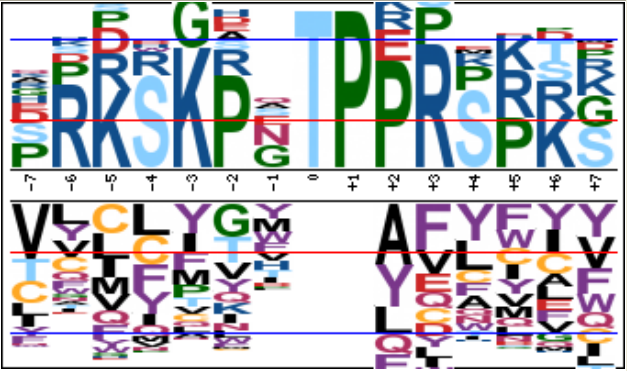

2.06

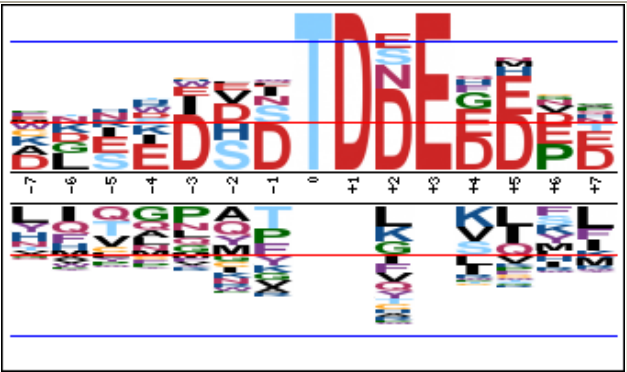

2.07

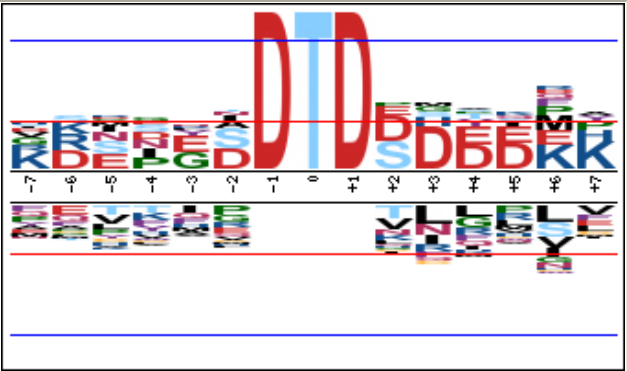

2.08

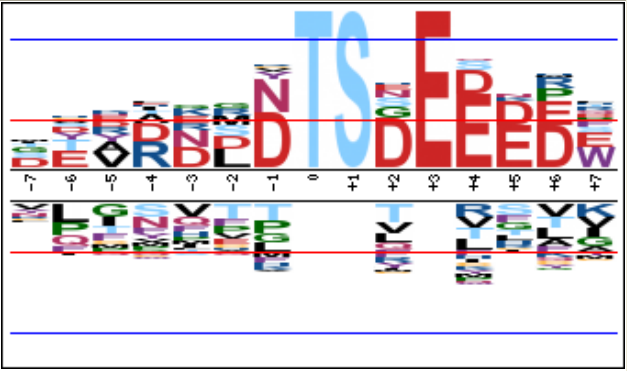

2.09

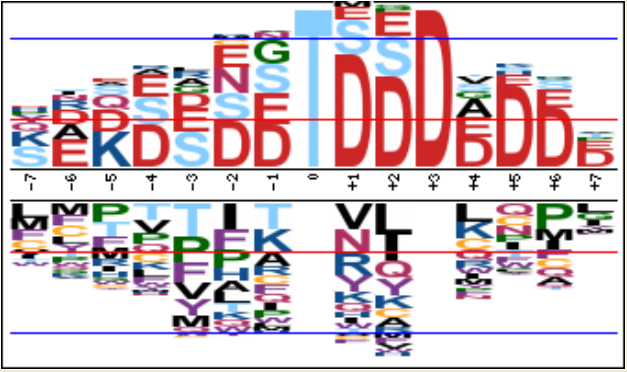

2.10

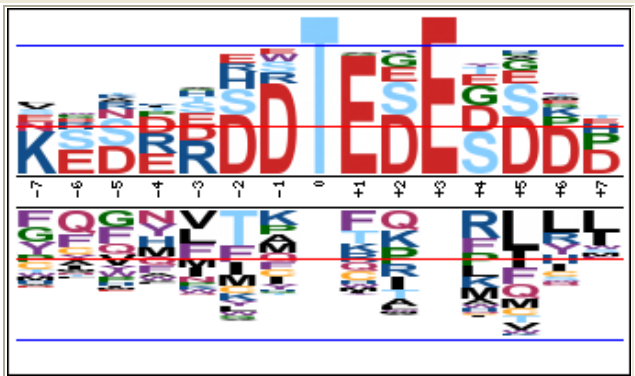

2.11

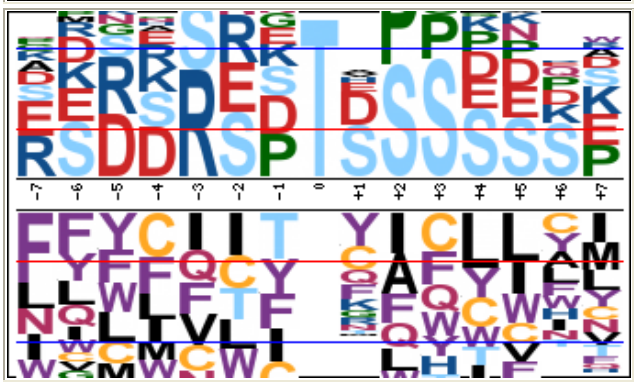

Supplement: M800332-MCP200_7.pdf [file M800332-MCP200_7.pdf]
