# Supplementary material
Source: PubMed Central journal article supplement (PMC2634583)
Supplement: M800332-MCP200_2.pdf [file M800332-MCP200_2.pdf]

# xxxxmotif-xxxxx

v1.2 10.05.06

## Supplementary Table 2 Fly Serine and Threonine Phosphorylation Motifs

### Serine Phosphorylation Motifs

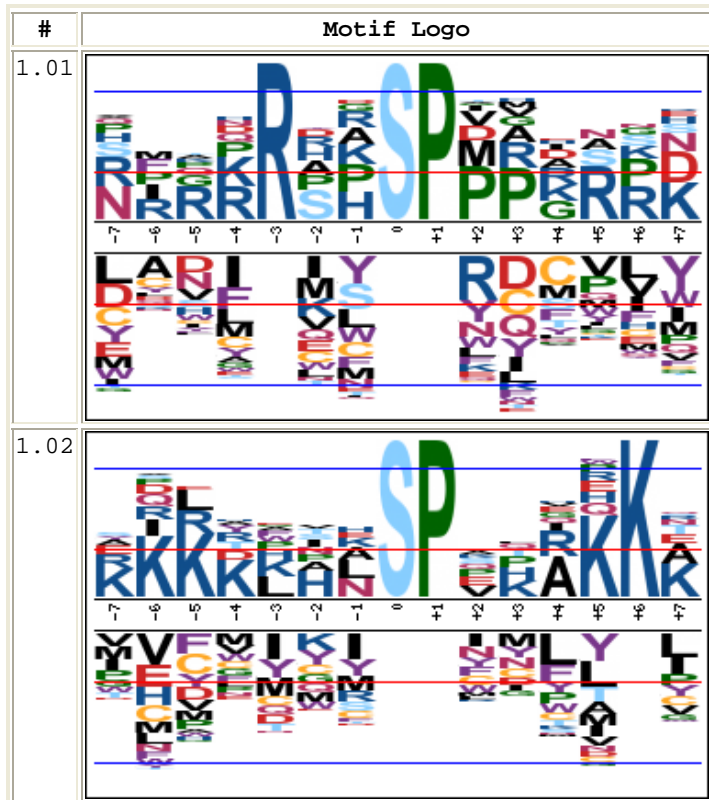

| #    | Motif                          | Motif Score | Foreground Matches | Foreground Size | Background Matches | Background Size | Fold Increase | -Log(P) Value |
|------|--------------------------------|-------------|--------------------|-----------------|--------------------|-----------------|---------------|---------------|
| 1.01 | <a href="#">....R..SP.....</a> | 371.60      | 296                | 8849            | 1870               | 588351          | 10.52         | 189.6028      |
| 1.02 | <a href="#">.....sP....K.</a>  | 347.38      | 182                | 8553            | 1429               | 586481          | 8.73          | 103.4413      |
| 1.03 | <a href="#">...K..sP.....</a>  | 344.48      | 160                | 8371            | 1348               | 585052          | 8.30          | 87.8654       |
| 1.04 | <a href="#">...RR.s.....</a>   | 367.53      | 305                | 8211            | 2775               | 583704          | 7.81          | 160.2839      |
| 1.05 | <a href="#">.....sP.K....</a>  | 342.44      | 144                | 7906            | 1298               | 580929          | 8.15          | 78.2148       |
| 1.06 | <a href="#">.....sP....R.</a>  | 310.78      | 140                | 7762            | 1455               | 579631          | 7.19          | 69.3772       |
| 1.07 | <a href="#">...RK.s.....</a>   | 262.74      | 159                | 7622            | 1820               | 578176          | 6.63          | 73.9068       |
| 1.08 | <a href="#">.....sPK.....</a>  | 262.05      | 101                | 7463            | 1000               | 576356          | 7.80          | 53.4291       |
| 1.09 | <a href="#">...R..sP.....</a>  | 222.00      | 98                 | 7362            | 1053               | 575356          | 7.27          | 49.2825       |
| 1.10 | <a href="#">...KR.s.....</a>   | 227.14      | 165                | 7264            | 1852               | 574303          | 7.04          | 80.4466       |
| 1.11 | <a href="#">.R..R.s.....</a>   | 214.38      | 137                | 7099            | 1947               | 572451          | 5.67          | 56.0459       |
| 1.12 | <a href="#">K.....sP.....</a>  | 194.01      | 80                 | 6962            | 896                | 570504          | 7.32          | 40.5855       |
| 1.13 | <a href="#">...R..s.....</a>   | 161.15      | 847                | 6882            | 24329              | 569608          | 2.88          | 161.1541      |
| 1.14 | <a href="#">...R.s.....</a>    | 177.05      | 841                | 6035            | 24807              | 545279          | 3.06          | 177.0504      |
| 1.15 | <a href="#">.....P.sP.....</a> | 184.35      | 122                | 5194            | 1892               | 520472          | 6.46          | 55.8926       |
| 1.16 | <a href="#">.....sP.....</a>   | 128.66      | 581                | 5072            | 18590              | 518580          | 3.20          | 128.6569      |
| 1.17 | <a href="#">.....sDDE....</a>  | 178.43      | 67                 | 4491            | 312                | 499990          | 23.91         | 65.9732       |
| 1.18 | <a href="#">.....sD.E....</a>  | 112.55      | 159                | 4424            | 2305               | 499678          | 7.79          | 83.9669       |
| 1.19 | <a href="#">...K..s.....</a>   | 54.45       | 476                | 4265            | 25435              | 497373          | 2.18          | 54.4501       |
| 1.20 | <a href="#">.....sDDD....</a>  | 80.04       | 39                 | 3789            | 248                | 471938          | 19.59         | 35.5644       |
| 1.21 | <a href="#">.....s.DE....</a>  | 56.40       | 89                 | 3750            | 1878               | 471690          | 5.96          | 38.4486       |
| 1.22 | <a href="#">.....sD.D....</a>  | 63.96       | 102                | 3661            | 1883               | 469812          | 6.95          | 49.7566       |

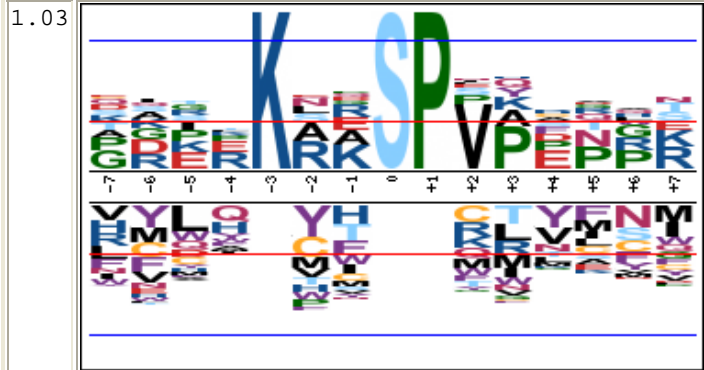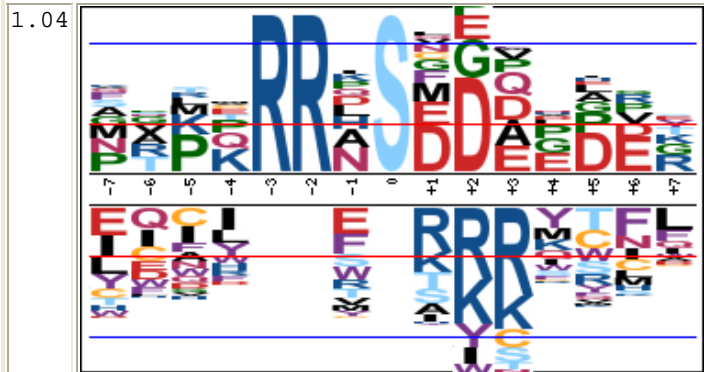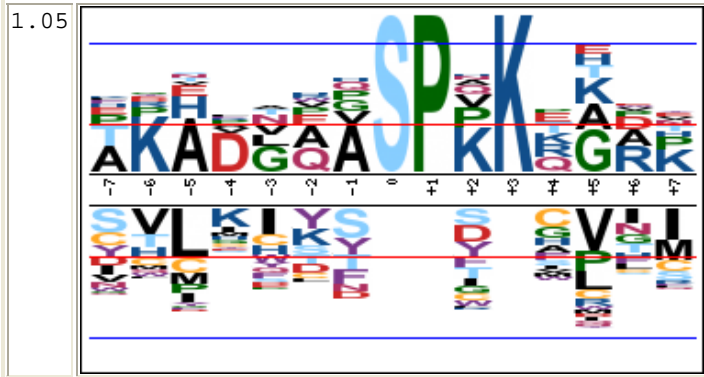

|      |                       |       |      |      |        |        |      |         |
|------|-----------------------|-------|------|------|--------|--------|------|---------|
| 1.23 | <u>.K.....s.....</u>  | 25.80 | 322  | 3559 | 22463  | 467929 | 1.88 | 25.7987 |
| 1.24 | <u>K.....s.....</u>   | 24.43 | 301  | 3237 | 21912  | 445466 | 1.89 | 24.4269 |
| 1.25 | <u>...R...s.....</u>  | 21.90 | 262  | 2936 | 19803  | 423554 | 1.91 | 21.8956 |
| 1.26 | <u>.....Ds.....</u>   | 19.34 | 237  | 2674 | 18955  | 403751 | 1.89 | 19.3367 |
| 1.27 | <u>.....Gs.....</u>   | 18.05 | 322  | 2437 | 30679  | 384796 | 1.66 | 18.0538 |
| 1.28 | <u>.....s.....K..</u> | 12.26 | 180  | 2115 | 17127  | 354117 | 1.76 | 12.2599 |
| 1.29 | <u>.....sL.....</u>   | 11.54 | 266  | 1935 | 30145  | 336990 | 1.54 | 11.5408 |
| 1.30 | <u>.....s.....</u>    | 0.00  | 1669 | 1669 | 306845 | 306845 | 1.00 | 0.0000  |

Motif search time: 1 minute, 55 seconds

1.06

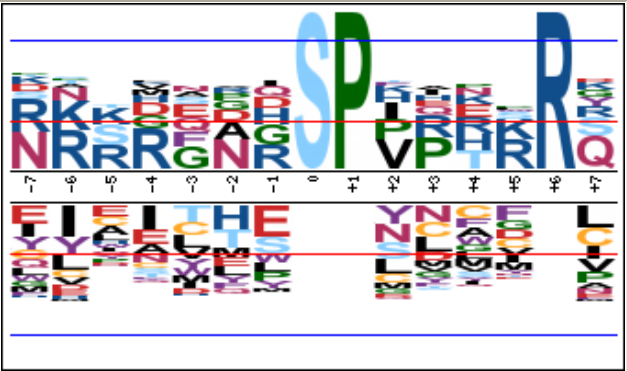

1.07

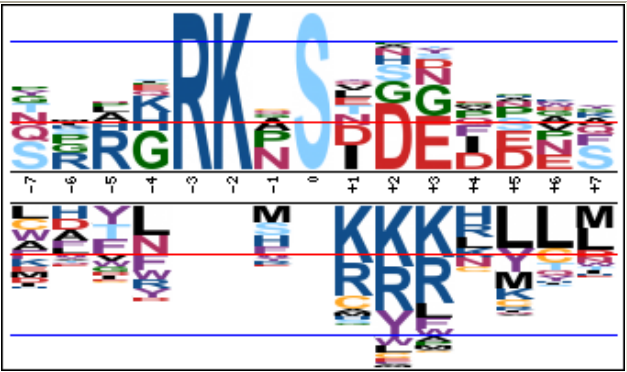

1.08

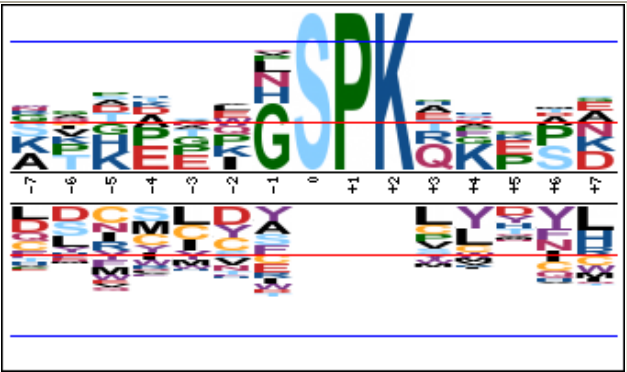



1.12

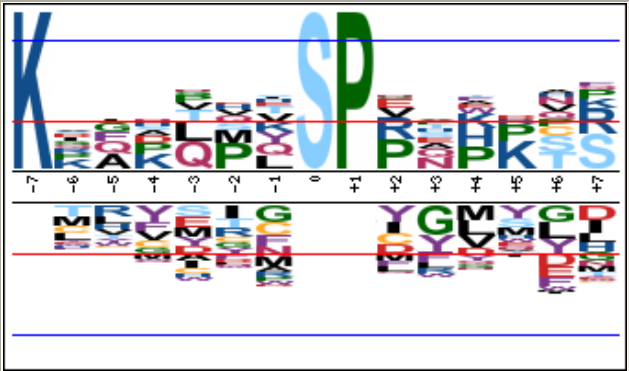

1.13

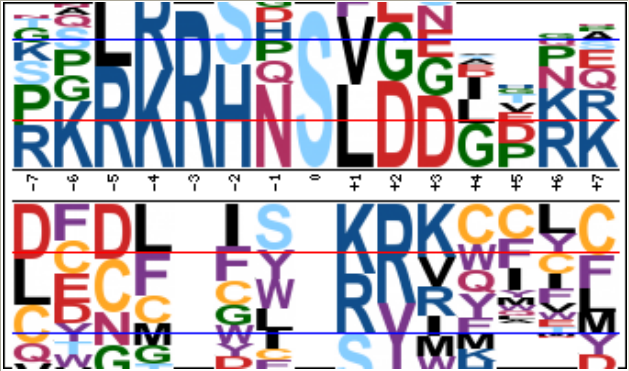

1.14

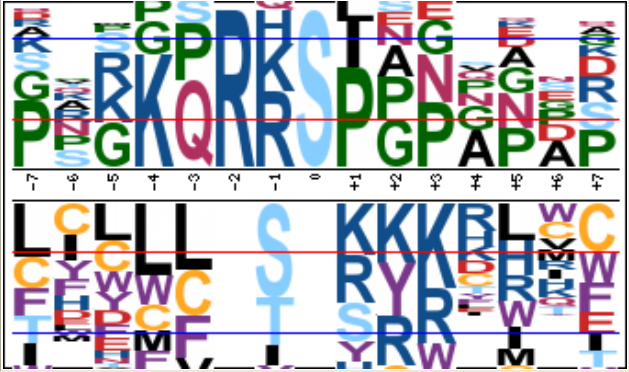

1.15

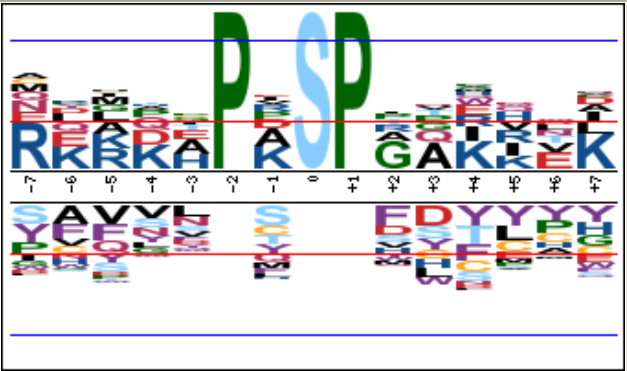

1.16

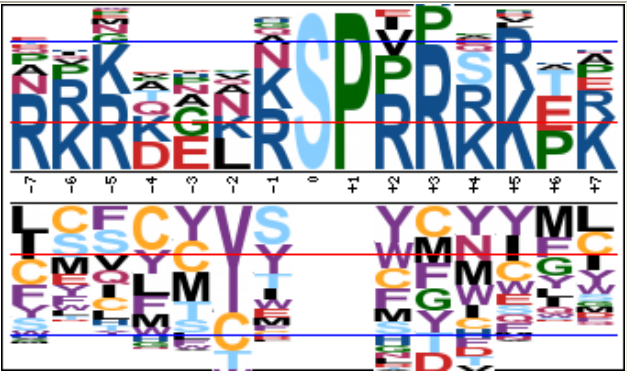

1.17

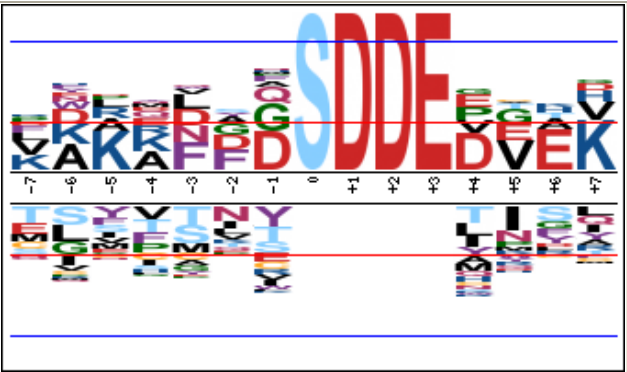

1.18

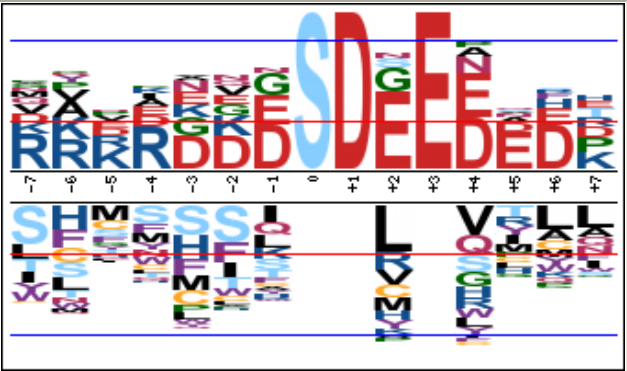

1.19

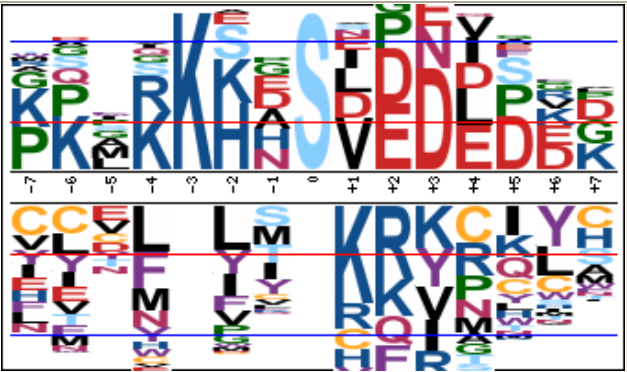

1.20

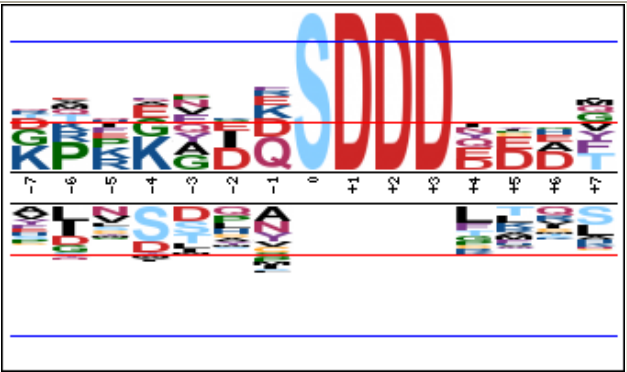

1.21

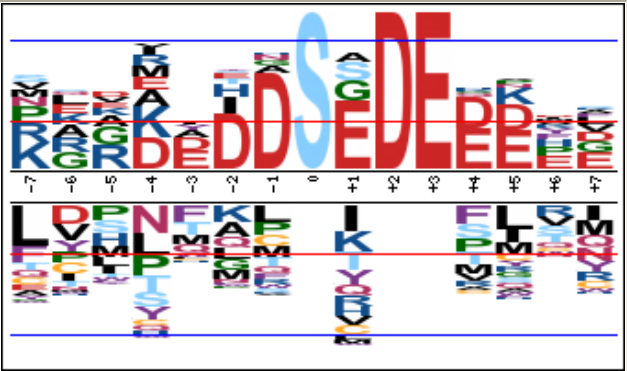

1.22

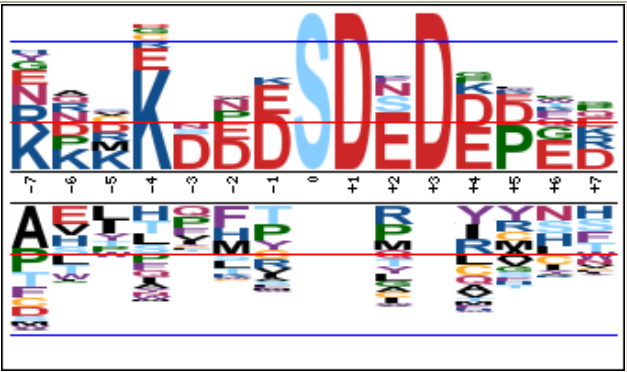

1.23

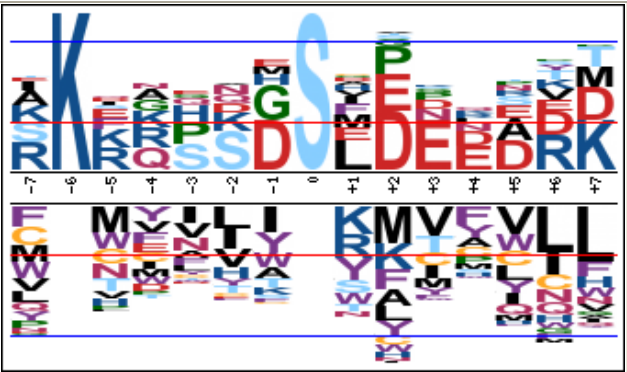



1.24

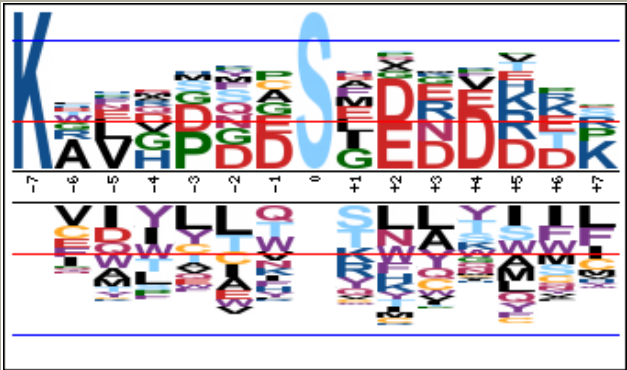

1.25

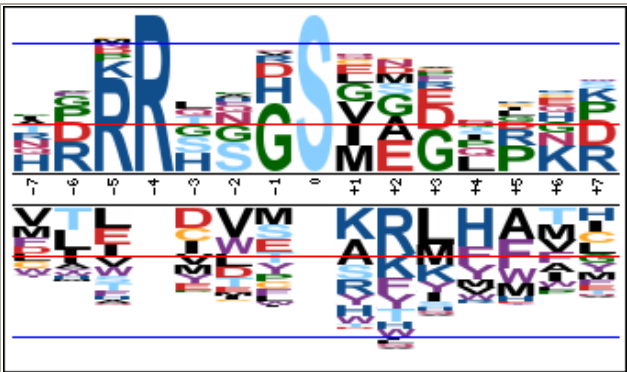

1.26

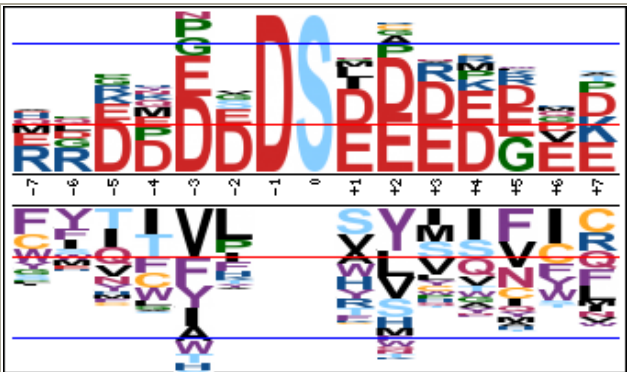

1.27

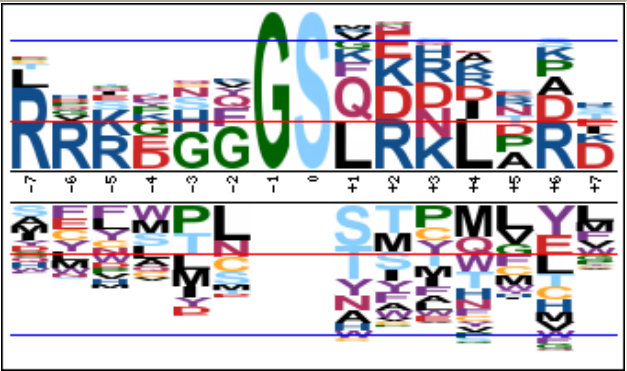

1.28

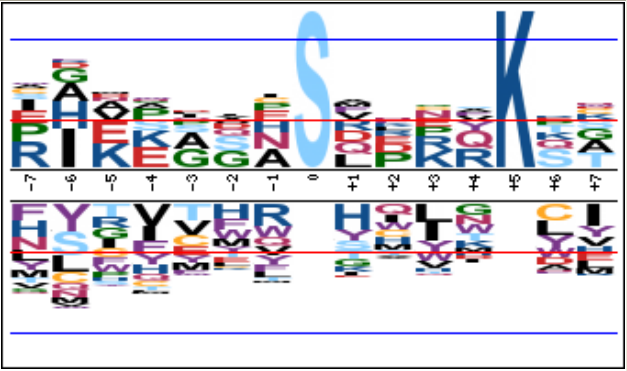

1.29

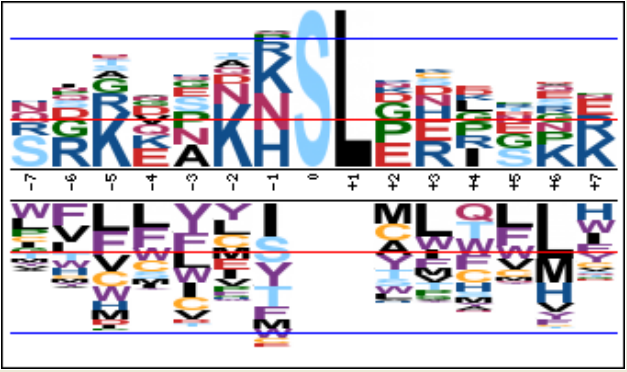

1.30

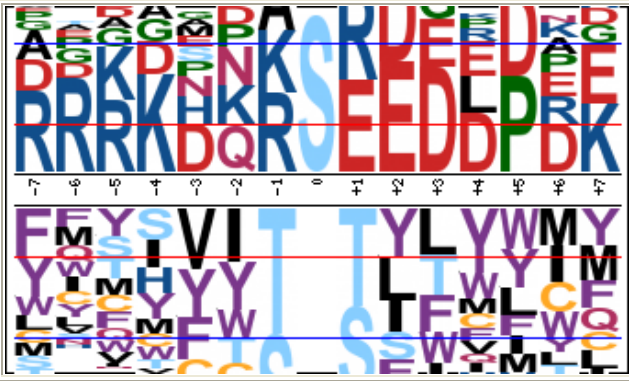

## Threonine Phosphorylation Motifs

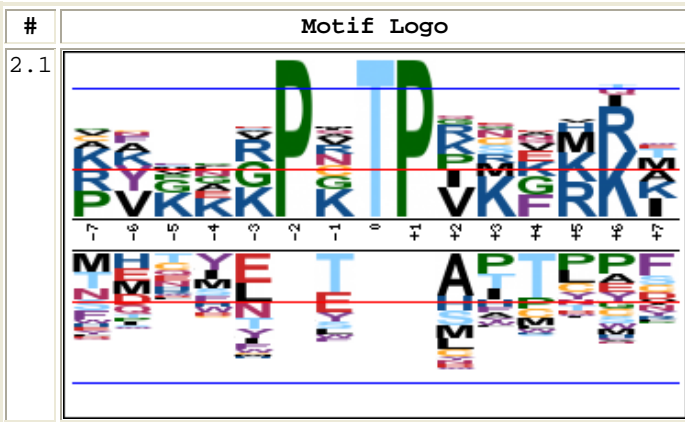

| #   | Motif                 | Motif Score | Foreground Matches | Foreground Size | Background Matches | Background Size | Fold Increase | -Log(P) Value |
|-----|-----------------------|-------------|--------------------|-----------------|--------------------|-----------------|---------------|---------------|
| 2.1 | <u>.....P.tP.....</u> | 244.60      | 146                | 2485            | 2756               | 402847          | 8.59          | 83.2322       |
| 2.2 | <u>.....tPP.....</u>  | 176.50      | 109                | 2339            | 2169               | 400091          | 8.60          | 62.2423       |
| 2.3 | <u>.....tP.....</u>   | 114.40      | 438                | 2230            | 22364              | 397922          | 3.49          | 114.4047      |
| 2.4 | <u>...RR.t.....</u>   | 57.99       | 58                 | 1792            | 1466               | 375558          | 8.29          | 32.6704       |
| 2.5 | <u>...KR.t.....</u>   | 39.28       | 47                 | 1734            | 1203               | 374092          | 8.43          | 26.9158       |
| 2.6 | <u>...R.t.....</u>    | 18.36       | 165                | 1687            | 17164              | 372889          | 2.12          | 18.3572       |
| 2.7 | <u>...R.t.....</u>    | 14.17       | 137                | 1522            | 15618              | 355725          | 2.05          | 14.1667       |
| 2.8 | <u>.....t.....</u>    | 0.00        | 1385               | 1385            | 340107             | 340107          | 1.00          | 0.0000        |

Motif search time: 34 seconds

2.2

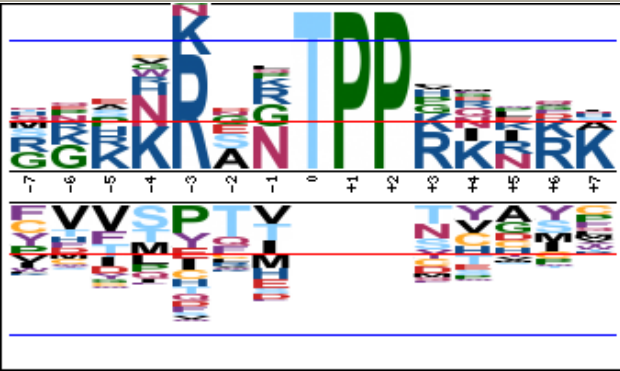

2.3

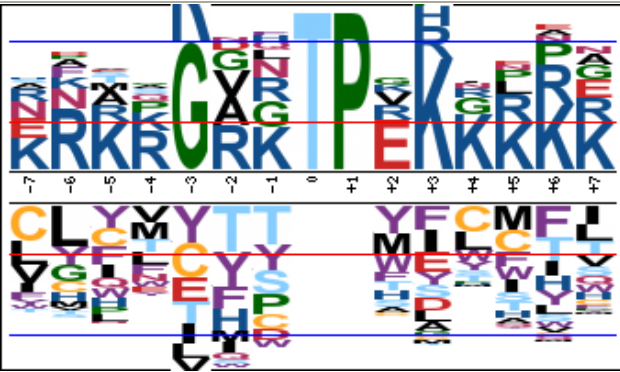

2.4

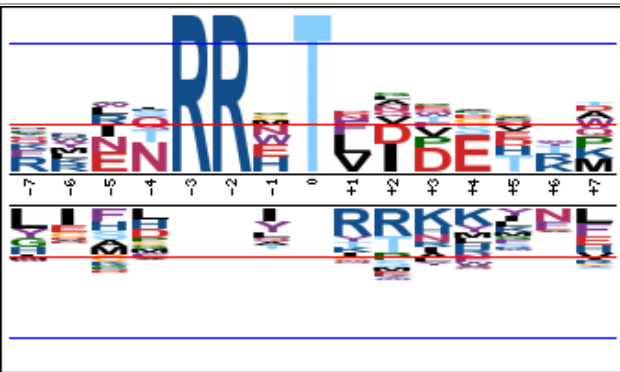

2.5

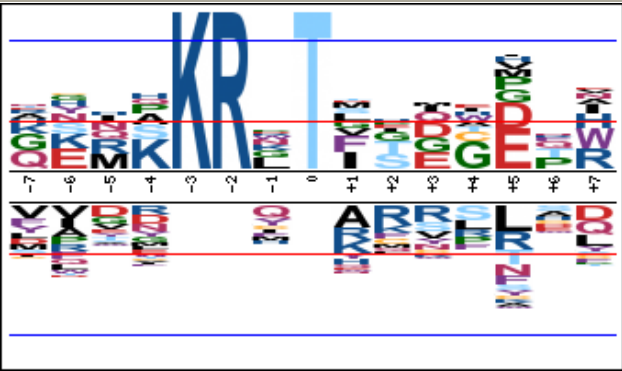

2.6

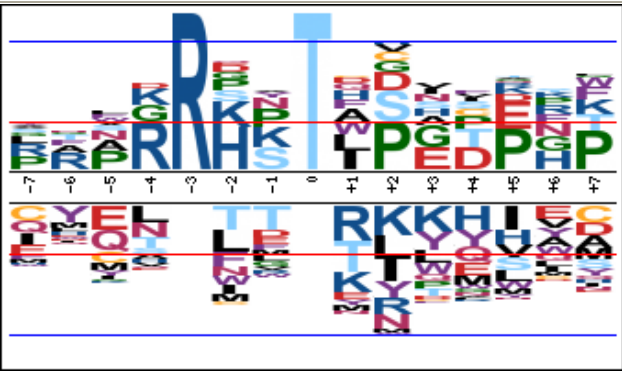

2.7

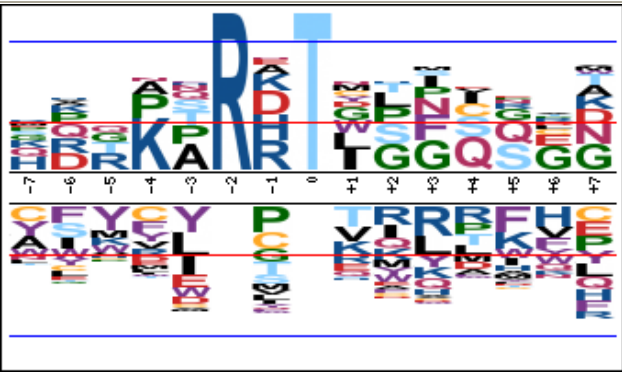

2.8

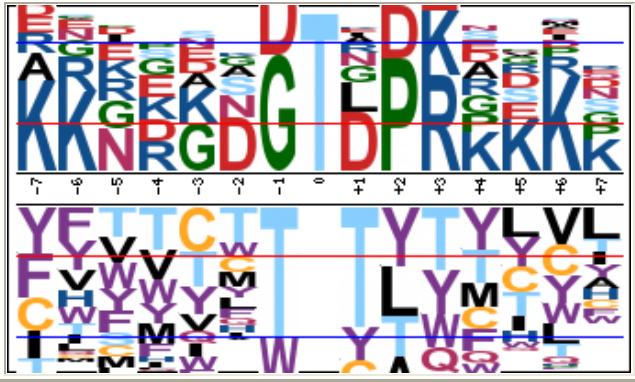

---
